# Supplementary material for: Asymmetric total synthesis of (+)-xestoquinone and (+)-adociaquinones A and B
Source: Royal Society of Chemistry journal article supplement (doi:10.1039/d0sc07089k), 2021-01-01
Supplement: d0sc07089k1.pdf [file d0sc07089k1.pdf]

## *Supporting Information*

### **Asymmetric total synthesis of (+)-xestoquinone and (+)-adociaquinones A and B**

Xiao-Long Lu,<sup>a†</sup> Yuanyou Qiu,<sup>a†</sup> Baochao Yang,<sup>a</sup> Haibin He,<sup>b</sup> Shuanhu Gao<sup>\*a,b</sup>

<sup>a</sup>Shanghai Key Laboratory of Green Chemistry and Chemical Processes, School of Chemistry and Molecular Engineering,  
East China Normal University, 3663N Zhongshan Road, Shanghai 200062, China

<sup>b</sup>Shanghai Engineering Research Center of Molecular Therapeutics and New Drug Development, East  
China Normal University, 3663N Zhongshan Road, Shanghai 200062, China

Email: shgao@chem.ecnu.edu.cn

<sup>†</sup>These authors contributed equally to this work.

### **Index**

|                                                                                                                                                        |     |
|--------------------------------------------------------------------------------------------------------------------------------------------------------|-----|
| General experimental procedures .....                                                                                                                  | S2  |
| Detail of the screening conditions of desymmetric intramolecular Michael addition .....                                                                | S3  |
| Experimental procedures and spectroscopic data .....                                                                                                   | S4  |
| Comparison of NMR spectroscopic data of natural and synthetic (+)-xestoquinone ( <b>2</b> ), (+)-adociaquinones A ( <b>3</b> ) and B ( <b>4</b> )..... | S16 |
| References.....                                                                                                                                        | S22 |
| <sup>1</sup> H and <sup>13</sup> C NMR, HPLC spectra of the synthetic intermediates and products.....                                                  | S23 |

## General experimental procedures

All reactions were carried out under an inert nitrogen atmosphere with dry solvents under anhydrous conditions unless otherwise noted. Anhydrous dichloromethane, tetrahydrofuran and toluene were purified by the PS-MD-5 (Innovative Technology) solvent purification system. Dimethyl sulfoxide used for IBX oxidation was purchased from commercially available anhydrous solvent. Anhydrous diethyl ether was distilled from sodium. The solvents used for condition screening of desymmetric intramolecular Michael addition are all commercially available analytical-grade solvents. TLC analyses were performed on EMD 250  $\mu\text{m}$  Silica Gel HSGF<sub>254</sub> plates and visualized by quenching of UV fluorescence ( $\lambda_{\text{max}} = 254 \text{ nm}$ ), or by staining phosphomolybdic acid, or potassium permanganate. Flash column chromatography was performed as described by Still<sup>[1]</sup>, employing SiliCycle UltraPure Silica Gels: SilicaFlash<sup>®</sup> P60 40 – 63  $\mu\text{m}$  (230 – 400 mesh). <sup>1</sup>H and <sup>13</sup>C NMR spectra were recorded on a Bruker-500, 400 spectrometers. Chemical shifts for <sup>1</sup>H and <sup>13</sup>C NMR spectra are reported in ppm ( $\delta$ ) relative to residue protium in the solvent (CDCl<sub>3</sub>:  $\delta$  7.26, 77.0 ppm; DMSO:  $\delta$  2.50, 40.4 ppm) and the multiplicities are presented as follows: s = singlet, d = doublet, t = triplet, q = quartet, m = multiplet, br = broad. High-resolution mass spectra (HRMS) were acquired on Waters Micromass GCT Premier or Bruker Daltonics, Inc. APEXIII 7.0 TESLA FTMS. Mass spectra were acquired on Agilent 5975C. Infrared (IR) spectra was obtained using a Shimadzu IRTracer-100 fourier transform infrared spectroscopy (FTIR). The  $[\alpha]_{\text{D}}^{20}$  was recorded at 365 nm using Anton Paar MCP 5500.

### General experimental procedure A for desymmetric intramolecular Michael addition without AcOH

A solution of **13**, catalyst in analytical-grade solvent was stirred at room temperature for indicated time without inert nitrogen atmosphere. Then the solution was evacuated and purified by flash chromatography or preparation lamella chromatography (20% ethyl acetate – petroleum ether).

### General experimental procedure B for desymmetric intramolecular Michael addition with AcOH

A solution of **13**, catalyst and additive AcOH in analytical-grade solvent was stirred at room temperature for indicated time without inert nitrogen atmosphere. Then the solution was quenched with saturated NaHCO<sub>3</sub> and extracted with ethyl acetate. The combined organic layers were washed with brine, dried over anhydrous sodium sulfate, concentrated and purified by silica gel flash chromatography or preparation lamella chromatography (20% ethyl acetate – petroleum ether).

## Detail of the screening conditions of desymmetric intramolecular Michael addition

**Table S1.** Screening conditions of desymmetric intramolecular Michael addition to obtain **14'** using *S*-catalysts.

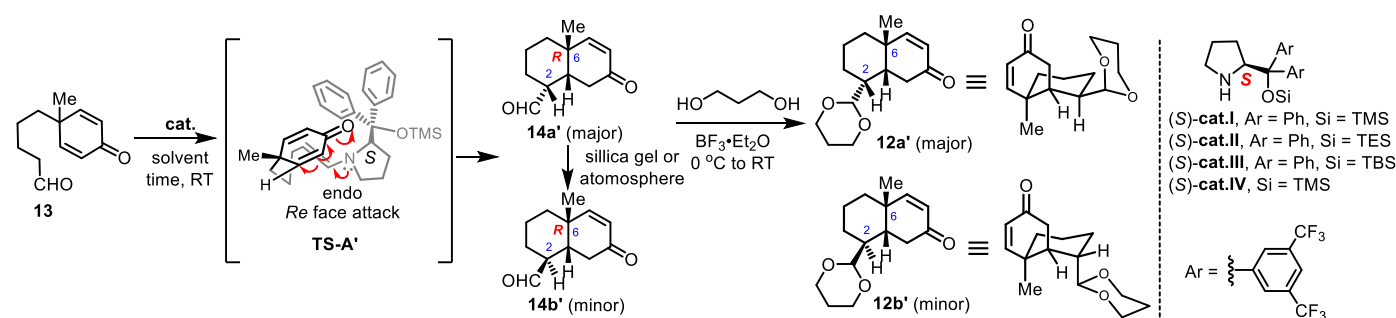

| entry           | cat. (equiv.)              | solvent                      | time   | yield/d.r. at C2 <sup>a</sup>          | e.e. <sup>b</sup>                      |
|-----------------|----------------------------|------------------------------|--------|----------------------------------------|----------------------------------------|
| 1 <sup>c</sup>  | Et <sub>2</sub> NH (10.0)  | MeOH/H <sub>2</sub> O (20:1) | 6.0 h  | 64%                                    | rac.                                   |
| 2               | ( <i>S</i> )-cat.I (0.5)   | MeOH/H <sub>2</sub> O (20:1) | 10.5 h | 48% / 3.0:1                            | <b>14a'</b> : -87%; <b>14b'</b> : -31% |
| 3               | ( <i>S</i> )-cat.II (0.5)  | MeOH/H <sub>2</sub> O (20:1) | 10.5 h | 56% / 2.8:1                            | <b>14a'</b> : -85%; <b>14b'</b> : -5%  |
| 4               | ( <i>S</i> )-cat.III (0.5) | MeOH/H <sub>2</sub> O (20:1) | 48.0 h | trace                                  | <b>14a'</b> : -80%; <b>14b'</b> : -15% |
| 5               | ( <i>S</i> )-cat.IV (0.5)  | MeOH/H <sub>2</sub> O (20:1) | 48.0 h | trace                                  | <b>14a'</b> : -84%; <b>14b'</b> : -6%  |
| 6               | ( <i>S</i> )-cat.I (0.5)   | MeOH                         | 2.0 h  | 63% / 5.0:1                            | <b>14a'</b> : -85%; <b>14b'</b> : -37% |
| 7               | ( <i>S</i> )-cat.I (0.5)   | DCM                          | 24.0 h | 51% / 1.1:1                            | <b>14a'</b> : -93%; <b>14b'</b> : -86% |
| 8               | ( <i>S</i> )-cat.I (0.5)   | Et <sub>2</sub> O            | 24.0 h | 50% / 2.8:1                            | <b>14a'</b> : -96%; <b>14b'</b> : -93% |
| 9               | ( <i>S</i> )-cat.I (0.5)   | MeCN                         | 24.0 h | 47% / 1.0:1                            | <b>14a'</b> : -93%; <b>14b'</b> : -88% |
| 10              | ( <i>S</i> )-cat.I (0.5)   | toluene                      | 5.5 h  | 42% / 22.0:1                           | <b>14a'</b> : -97%; <b>14b'</b> : -89% |
| 11 <sup>c</sup> | ( <i>S</i> )-cat.I (0.5)   | toluene                      | 11.0 h | 52% / 4.5:1                            | <b>14a'</b> : -97%; <b>14b'</b> : -89% |
| 12 <sup>d</sup> | ( <i>S</i> )-cat.I (0.3)   | toluene                      | 16.0 h | 73% <sup>e</sup> / 1.7:1 <sup>f</sup>  | <b>14a'</b> : -97%; <b>14b'</b> : -94% |
| 13 <sup>g</sup> | ( <i>S</i> )-cat.I (0.2)   | toluene                      | 16.0 h | 86% <sup>g</sup> / 2.0:1 <sup>f</sup>  | <b>14a'</b> : -96%; <b>14b'</b> : -89% |
| 14 <sup>h</sup> | ( <i>S</i> )-cat.I (0.4)   | toluene                      | 12.0 h | 62% <sup>i</sup> / 14.0:1 <sup>j</sup> | <b>14a'</b> : -96%; <b>14b'</b> : -89% |

All reactions were performed using **13** (5.8 mg, 0.03 mmol, 1.0 equiv., 0.05 M) and catalyst at room temperature in analytical-grade solvents, unless otherwise noted. <sup>a</sup>The yields and diastereoisomeric ratios (d.r.) were determined from the crude <sup>1</sup>H NMR spectrum of **14'** using CH<sub>2</sub>Br<sub>2</sub> as an internal standard, unless otherwise noted. <sup>b</sup>The enantiomeric excess (e.e.) values were determined by chiral high-performance liquid chromatography (Chiralpak IG-H). <sup>c</sup>Compound **13**: 9.6 mg, 0.05 mmol, 0.1 M. <sup>d</sup>Compound **13**: 96 mg, 0.5 mmol, 0.1 M. <sup>e</sup>Isolated yield of **14a'+14b'**. <sup>f</sup>The d.r. values were determined from the <sup>1</sup>H NMR spectrum of purified **14'** after purification by silica gel column chromatography. <sup>g</sup>Compound **13**: 1.0 g, 5.2 mmol, 0.1 M. <sup>h</sup>Compound **13**: 288 mg, 1.5 mmol, 0.1 M. <sup>i</sup>Isolated yield of **12a'+12b'**. <sup>j</sup>The d.r. values were determined from the crude <sup>1</sup>H NMR spectrum of **12'** obtained from the one-pot process.

**Table S2.** Supplementary experiments as reviewer's suggestions.

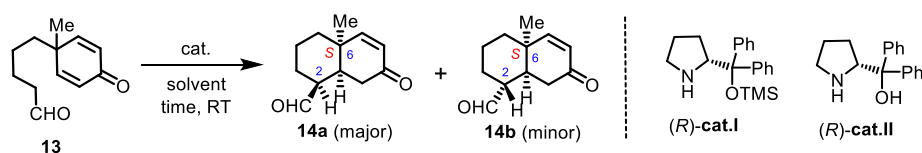

| entry | condition                                                                                                                                                                 | result                                                    |
|-------|---------------------------------------------------------------------------------------------------------------------------------------------------------------------------|-----------------------------------------------------------|
| 1     | without <b>13</b><br>( <i>R</i> )-cat.I (0.05 mmol, 16.3 mg, 1.0 equiv.)<br>AcOH (0.25 mmol, 15.0 mg, 5.0 equiv.)<br>toluene (0.5 mL), RT, 9.0 h                          | ( <i>R</i> )-cat.I : stable<br>TMS group: not deprotected |
| 2     | <b>13</b> (0.05 mmol, 9.6 mg, 1.0 equiv.)<br>( <i>R</i> )-cat.II (0.05 mmol, 16.3 mg, 1.0 equiv.)<br>toluene (0.5 mL), RT, 9.0 h                                          | N.R.                                                      |
| 3     | <b>13</b> (0.05 mmol, 9.6 mg, 1.0 equiv.)<br>( <i>R</i> )-cat.II (0.05 mmol, 16.3 mg, 1.0 equiv.)<br>AcOH (0.25 mmol, 15.0 mg, 5.0 equiv.)<br>toluene (0.5 mL), RT, 9.0 h | N.R.                                                      |

The entry 1 in **Table S2** indicate that the Hayashi–Jørgensen catalyst (*R*)-cat.I was stable under the stirred solution of 0.5 N AcOH/toluene for more than 9 hours. Besides, we conclude that (*R*)-cat.I was the effective catalyst in this desymmetrization reaction based on entries 2, 3 in **Table S2**.

## Experimental procedures and spectroscopic data

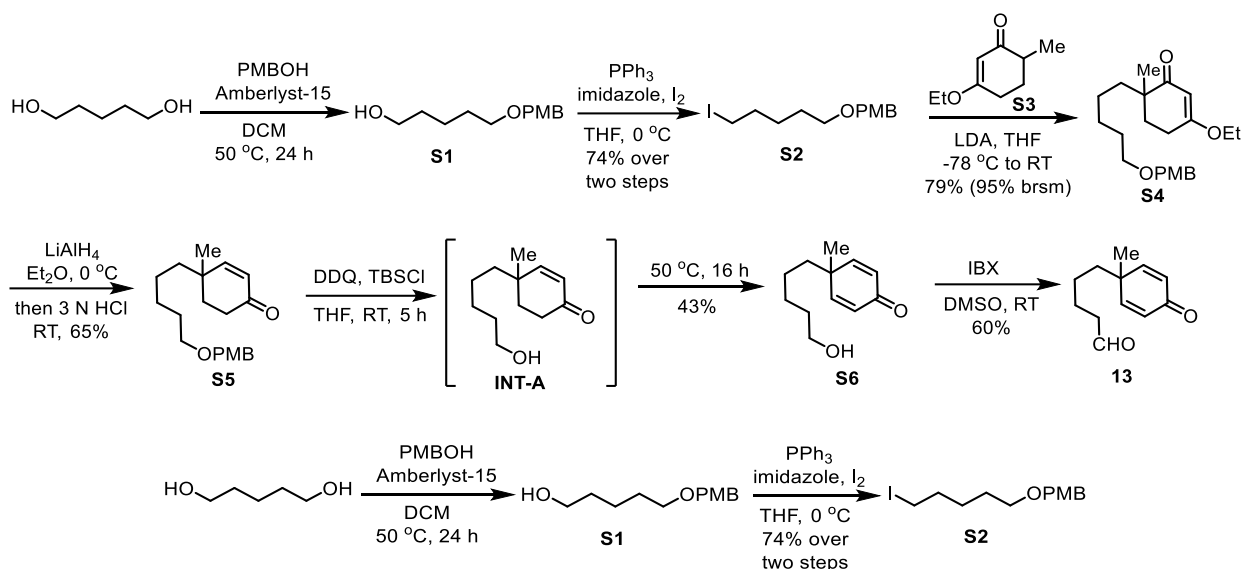

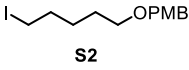
**S2** To a stirred solution of 4-methoxybenzyl alcohol (55.26 g, 49.6 mL, 0.40 mol, 1.0 equiv.) and 1,5-pentanediol (62.5 g, 62.9 mL, 0.60 mol, 1.5 equiv.) in anhydrous DCM (500 mL) at room temperature was added Amberlyst-15 resin (8.29 g, 15% w/w). The mixture was refluxed at 50 °C for 24 hours then filtered through silica gel and washed with DCM (6×50 mL). The filtrate was concentrated and the obtained crude compound **S1** was dissolved in anhydrous THF (800 mL). Then imidazole (81.7 g, 1.20 mol, 3.0 equiv.), PPh<sub>3</sub> (157.37 g, 0.60 mol, 1.5 equiv.), I<sub>2</sub> (152.29 g, 0.6 mol, 1.5 equiv.) was successively added to the solution at 0 °C. After stirred at 0 °C for 1 hour, the solution was quenched with saturated Na<sub>2</sub>S<sub>2</sub>O<sub>3</sub> (100 mL) then THF was evacuated. The mixture was extracted with ethyl acetate (3×200 mL). The combined organic layers were washed with water, brine, dried over anhydrous sodium sulfate, concentrated, and added 200 mL Et<sub>2</sub>O. Then the undissolved triphenylphosphine oxide was filtered and washed with Et<sub>2</sub>O (3×50 mL). The filtrate was concentrated and purified by silica gel flash chromatography (5% to 10% ethyl acetate – petroleum ether) to obtain **S2** as a light yellow viscous oil (98.87 g, 74% over two steps). R<sub>f</sub> = 0.42 (10% ethyl acetate – petroleum ether). The NMR spectra of **S2** were consistent with the previous report [2].

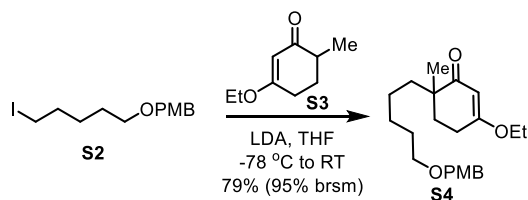

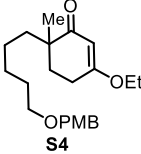
**S4** To a stirred solution of diisopropylamine (28 mL, 200 mmol, 2.0 equiv.) in anhydrous THF (300 mL) at 0 °C under nitrogen atmosphere was slowly added *n*-BuLi (80 mL, 200 mmol, 2.0 equiv., 2.5 M in hexane). After stirring at 0 °C for 30 minutes, the compound **S3** (15.4 g, 100 mmol, 1.0 equiv.) in anhydrous THF (50 mL) was slowly added at -78 °C. Then the mixture was stirred for 30 minutes at -78 °C and stirred for 30 minutes at room temperature. After that, compound **S2** (66.8 g, 200 mmol, 2.0

equiv.) in anhydrous THF (50 mL) was slowly added to the mixture at  $-78\text{ }^{\circ}\text{C}$  and slowly warmed to room temperature. After stirring at room temperature overnight, the mixture was quenched with water (100 mL) and extracted with ethyl acetate ( $3\times 100\text{ mL}$ ). The combined organic layers were washed with brine, dried over anhydrous sodium sulfate, concentrated, and purified by silica gel flash chromatography (10% to 20% ethyl acetate – petroleum ether) to obtain **S4** as a light yellow viscous oil (27.35 g, 79%) and 2.46 g recycling starting material **S3**.  $R_f = 0.24$  (10% ethyl acetate – petroleum ether); Light yellow viscous oil;  $^1\text{H NMR}$  (400 MHz, Chloroform-*d*)  $\delta$  7.24 (d,  $J = 8.6\text{ Hz}$ , 2H), 6.86 (d,  $J = 8.6\text{ Hz}$ , 2H), 5.22 (s, 1H), 4.41 (s, 2H), 3.87 (q,  $J = 7.0\text{ Hz}$ , 2H), 3.79 (s, 3H), 3.41 (t,  $J = 6.6\text{ Hz}$ , 2H), 2.48 – 2.31 (m, 2H), 1.94 – 1.82 (m, 1H), 1.70 (ddd,  $J = 13.4, 7.5, 5.7\text{ Hz}$ , 1H), 1.64 – 1.54 (m, 2H), 1.54 – 1.46 (m, 1H), 1.46 – 1.36 (m, 1H), 1.34 (t,  $J = 7.1\text{ Hz}$ , 3H), 1.32 – 1.27 (m, 2H), 1.27 – 1.17 (m, 2H), 1.05 (s, 3H) ppm;  $^{13}\text{C NMR}$  (100 MHz, Chloroform-*d*)  $\delta$  204.2, 175.6, 159.1, 130.8, 129.2 (2C), 113.7 (2C), 101.3, 72.5, 70.1, 64.1, 55.2, 43.2, 36.9, 32.2, 29.7, 26.9, 26.1, 23.8, 22.3, 14.2 ppm; IR  $\nu_{\text{max}}$  2935, 2858, 1653, 1608, 1512, 1458, 1375, 1359, 1246, 1190, 1099, 1035, 896, 846, 821  $\text{cm}^{-1}$ ; HRMS–EI ( $m/z$ ):  $[\text{M}]^+$  calculated for  $\text{C}_{22}\text{H}_{32}\text{O}_4$ , 360.2301, found, .360.2299.

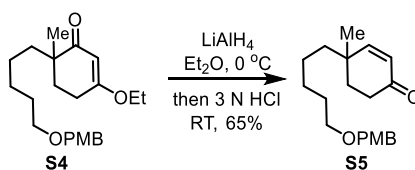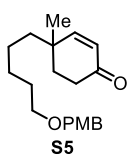

To a stirred mixture of  $\text{LiAlH}_4$  (5.73 g, 151.2 mmol, 1.2 equiv.) in anhydrous  $\text{Et}_2\text{O}$  (400 mL) at  $0\text{ }^{\circ}\text{C}$  under nitrogen atmosphere was slowly added compound **S4** (43.62 g, 126 mmol, 1.0 equiv.) in anhydrous  $\text{Et}_2\text{O}$  (100 mL). After stirred at  $0\text{ }^{\circ}\text{C}$  for 30 minutes, 300 mL saturated  $\text{NH}_4\text{Cl}$  was slowly added to the mixture and then added 300 mL 3 N  $\text{HCl}$  at  $0\text{ }^{\circ}\text{C}$ . The mixture was slowly warmed to room temperature and stirred for another 1 hour. Separated the  $\text{Et}_2\text{O}$  layer and washed with water, saturated  $\text{NaHCO}_3$ , brine. Then the separated total aqueous layer was extracted with ethyl acetate ( $3\times 100\text{ mL}$ ) and the separated ethyl acetate layer was washed with water, saturated  $\text{NaHCO}_3$ , brine. The combined organic layers were dried over anhydrous sodium sulfate, concentrated, and purified by silica gel flash chromatography (10% to 20% ethyl acetate – petroleum ether) to obtain **S5** as a light yellow viscous oil (26.0 g, 65%).  $R_f = 0.30$  (10% ethyl acetate – petroleum ether); Light yellow viscous oil;  $^1\text{H NMR}$  (400 MHz, Chloroform-*d*)  $\delta$  7.25 (d,  $J = 8.4\text{ Hz}$ , 2H), 6.87 (d,  $J = 8.6\text{ Hz}$ , 2H), 6.65 (d,  $J = 10.2\text{ Hz}$ , 1H), 5.86 (d,  $J = 10.2\text{ Hz}$ , 1H), 4.43 (s, 2H), 3.80 (s, 3H), 3.43 (t,  $J = 6.5\text{ Hz}$ , 2H), 2.47 – 2.38 (m, 2H), 1.94 (ddd,  $J = 14.5, 8.9, 5.9\text{ Hz}$ , 1H), 1.74 (dt,  $J = 12.8, 6.0\text{ Hz}$ , 1H), 1.66 – 1.58 (m, 2H), 1.50 – 1.22 (m, 6H), 1.11 (s, 3H) ppm;  $^{13}\text{C NMR}$  (100 MHz, Chloroform-*d*)  $\delta$  199.7, 159.4, 159.1, 130.7, 129.2 (2C), 127.3, 113.8 (2C), 72.6, 69.9, 55.3, 41.0, 35.6, 34.2, 33.5, 29.7, 26.9, 24.9, 24.0 ppm; IR  $\nu_{\text{max}}$  2933, 2859, 1682, 1612, 1512, 1463, 1301, 1265, 1246, 1097, 1035, 804  $\text{cm}^{-1}$ ; HRMS–EI

(*m/z*): [*M*]<sup>+</sup> calculated for C<sub>20</sub>H<sub>28</sub>O<sub>3</sub>, 316.2038, found, 316.2034.

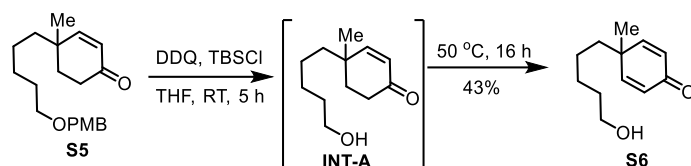

To a stirred solution of **S5** (13.0 g, 41.08 mmol, 1.0 equiv.) in anhydrous THF (400 mL) at room temperature was successively added DDQ (28.0 g, 123.24 mmol, 3.0 equiv.), TBSCl (6.81 g, 45.19 mmol, 1.1 equiv.) portion-wisely. After stirring at room temperature for 5 hours, the brown mixture was stirred at 50 °C for further 16 hours. The mixture was concentrated and diluted with ethyl acetate (150 mL) then quenched with saturated Na<sub>2</sub>S<sub>2</sub>O<sub>3</sub>/NaHCO<sub>3</sub> (150 mL, v/v = 1:1). Separated the ethyl acetate layer and washed with water, brine. Then the separated total aqueous layer was extracted with ethyl acetate (3×100 mL). The combined organic layers were dried over anhydrous sodium sulfate, concentrated, and purified by silica gel flash chromatography (30% to 60% ethyl acetate – petroleum ether) to obtain **S6** as a brown viscous oil (3.43 g, 43%). *R<sub>f</sub>* = 0.20 (30% ethyl acetate – petroleum ether); Brown viscous oil; <sup>1</sup>H NMR (500 MHz, Chloroform-*d*) δ 6.76 (d, *J* = 10.1 Hz, 2H), 6.26 (d, *J* = 10.1 Hz, 2H), 3.60 (t, *J* = 6.5 Hz, 2H), 1.66 – 1.59 (m, 2H), 1.55 – 1.47 (m, 2H), 1.47 (br s, 1H), 1.36 – 1.26 (m, 2H), 1.24 (s, 3H), 1.19 – 1.09 (m, 2H) ppm; <sup>13</sup>C NMR (125 MHz, Chloroform-*d*) δ 186.4, 155.9 (2C), 128.8 (2C), 62.7, 42.0, 40.5, 32.4, 26.1, 26.0, 24.8 ppm; IR *v*<sub>max</sub> 3051, 2934, 2863, 1741, 1662, 1616, 1459, 1267, 1246, 1037, 862, 704 cm<sup>-1</sup>; HRMS–EI (*m/z*): [*M*]<sup>+</sup> calculated for C<sub>12</sub>H<sub>18</sub>O<sub>2</sub>, 194.1307, found, 194.1305.

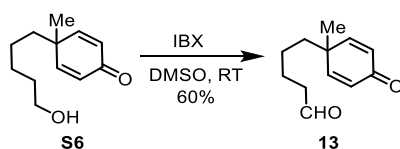

To a stirred solution of **S6** (3.30 g, 17.00 mmol, 1.0 equiv.) in anhydrous DMSO (50 mL) at room temperature was added IBX (9.52 g, 34.00 mmol, 2.0 equiv.) portion-wisely. After stirring at room temperature for 2 hours, the mixture was quenched with saturated Na<sub>2</sub>S<sub>2</sub>O<sub>3</sub>/NaHCO<sub>3</sub> (50 mL, v/v = 1:1) and extracted with ethyl acetate (3×50 mL). The combined organic layers were washed with water, brine, then dried over anhydrous sodium sulfate, concentrated, and purified by silica gel flash chromatography (30% to 40% ethyl acetate – petroleum ether) to obtain **13** as a light brown oil (1.96 g, 60%). *R<sub>f</sub>* = 0.20 (20% ethyl acetate – petroleum ether); Light brown oil; <sup>1</sup>H NMR (500 MHz, Chloroform-*d*) δ 9.69 (s, 1H), 6.72 (d, *J* = 10.0 Hz, 2H), 6.22 (d, *J* = 10.0 Hz, 2H), 2.36 (td, *J* = 7.3, 1.5 Hz, 2H), 1.63 – 1.57 (m, 2H), 1.57 – 1.49 (m, 2H), 1.21 (s, 3H), 1.16 – 1.06 (m, 2H) ppm; <sup>13</sup>C NMR (125 MHz, Chloroform-*d*) δ 202.0, 186.1, 155.5 (2C), 128.8 (2C), 43.5, 41.8, 40.2, 26.0, 24.5, 22.0 ppm; IR *v*<sub>max</sub> 3053, 2937, 2862, 1718, 1664, 1624, 1458,

1404, 1267, 1242, 1105, 864  $\text{cm}^{-1}$ ; HRMS–EI ( $m/z$ ):  $[\text{M}]^+$  calculated for  $\text{C}_{12}\text{H}_{16}\text{O}_2$ , 192.1150, found, 192.1151.

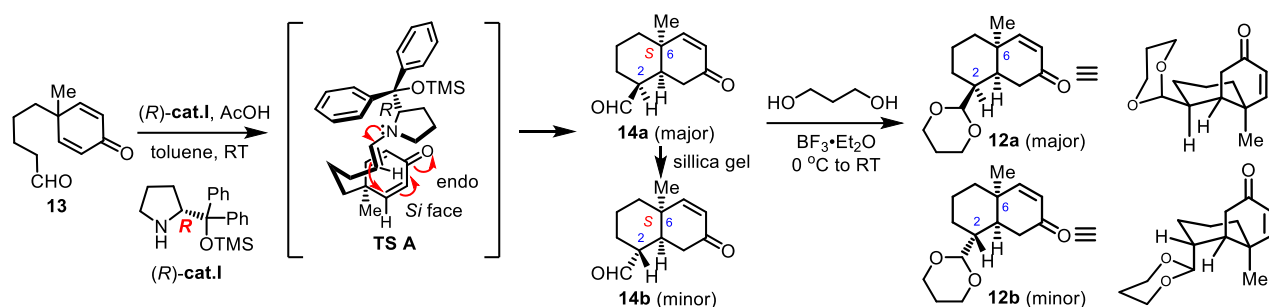

A solution of **13** (1.54 g, 8.00 mmol, 1.0 equiv.), (*R*)-**cat.I** (520 mg, 1.60 mmol, 0.2 equiv.) and AcOH (96 mg, 1.60 mmol, 0.2 equiv.) in analytical-grade toluene (80 mL) was stirred at room temperature for 9.5 hours with inert nitrogen atmosphere. Then 1,3-propanediol (2.44 g, 2.31 mL, 32.00 mol, 4.0 equiv.), 46.5%  $\text{BF}_3 \cdot \text{Et}_2\text{O}$  (1.14 g, 0.99 mL, 8.0 mmol, 1.0 equiv.) was added to the solution at 0 °C and stirred at room temperature for further 2 hours. The solution was quenched with saturated  $\text{NaHCO}_3$  (50 mL) and extracted with ethyl acetate (3×50 mL). The combined organic layers were washed with brine, then dried over anhydrous sodium sulfate, concentrated and purified by flash chromatography (20% ethyl acetate – petroleum ether) to obtain pure **12a** (1.05 g), pure **12b** (0.15 g) and the mixture of **12a+12b** (0.40 g) all as light yellow viscous oil (total 1.6 g, total 80% for one pot synthesis, d.r. = 5.5:1).

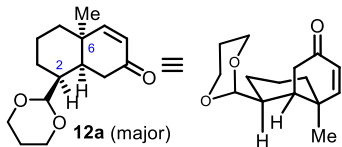 **12a** (major)  $R_f = 0.30$  (20% ethyl acetate – petroleum ether); Light yellow viscous oil;  $[\alpha]_{\text{D}}^{20} = -10.5$  ( $c = 1.00$  in DCM);  $^1\text{H NMR}$  (500 MHz, Chloroform-*d*)  $\delta$  6.62 (d,  $J = 10.1$  Hz, 1H), 5.84 (d,  $J = 10.1$  Hz, 1H), 4.24 (d,  $J = 7.4$  Hz, 1H), 4.12 – 4.02 (m, 2H), 3.76 – 3.63 (m, 2H), 2.46 – 2.35 (m, 1H), 2.30 – 2.20 (m, 2H), 2.10 – 2.02 (m, 1H), 2.01 – 1.94 (m, 1H), 1.81 – 1.69 (m, 1H), 1.67 – 1.60 (m, 1H), 1.54 – 1.44 (m, 3H), 1.33 (d,  $J = 13.5$  Hz, 1H), 1.16 (s, 3H), 1.14 – 1.10 (m, 1H) ppm;  $^{13}\text{C NMR}$  (125 MHz, Chloroform-*d*)  $\delta$  200.6, 161.5, 126.0, 103.1, 67.00, 66.97, 40.1, 38.3, 36.1, 34.7, 31.3, 25.9, 24.3, 21.3, 20.3 ppm; IR  $\nu_{\text{max}}$  2937, 2860, 1676, 1614, 1375, 1267, 1240, 1143, 1114, 1086, 1014, 935, 852  $\text{cm}^{-1}$ ; HRMS–EI ( $m/z$ ):  $[\text{M}]^+$  calculated for  $\text{C}_{15}\text{H}_{22}\text{O}_3$ , 250.1569, found, 250.1571.

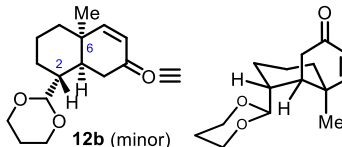 **12b** (minor)  $R_f = 0.34$  (20% ethyl acetate – petroleum ether); Light yellow viscous oil;  $[\alpha]_{\text{D}}^{20} = -64.9$  ( $c = 0.60$  in DCM);  $^1\text{H NMR}$  (500 MHz, Chloroform-*d*)  $\delta$  6.53 (dd,  $J = 10.1, 2.1$  Hz, 1H), 5.88 (d,  $J = 10.1$  Hz, 1H), 4.57 (d,  $J = 2.4$  Hz, 1H), 4.09 – 4.01 (m, 2H), 3.77 – 3.62 (m, 2H), 2.77 – 2.60 (m, 2H), 2.06 – 1.92 (m, 2H), 1.89 – 1.79 (m, 1H), 1.69 – 1.58 (m, 3H), 1.35 – 1.25 (m, 2H), 1.22 (s, 3H), 1.21 – 1.11 (m, 2H) ppm;  $^{13}\text{C NMR}$  (125 MHz, Chloroform-*d*)  $\delta$  199.4, 159.1, 128.3, 102.2, 67.1, 67.0, 42.0, 40.9, 40.2, 37.53, 37.52, 27.8, 25.8, 25.3, 22.6 ppm; IR  $\nu_{\text{max}}$  2936, 2858, 1676, 1610, 1377, 1238, 1151, 1122, 1101, 1016, 997, 941, 893  $\text{cm}^{-1}$ ; HRMS–EI ( $m/z$ ):  $[\text{M}]^+$  calculated for  $\text{C}_{15}\text{H}_{22}\text{O}_3$ , 250.1569, found, 250.1567.

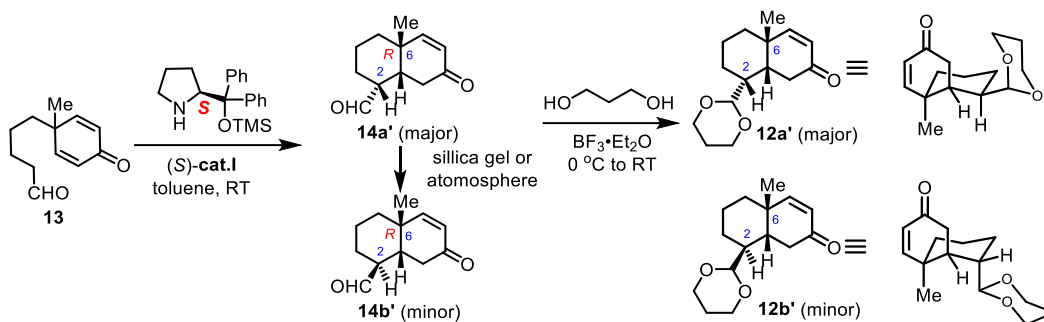

A solution of **13** (288 mg, 1.50 mmol, 1.0 equiv.), (*S*)-**cat.I** (195 mg, 0.60 mmol, 0.4 equiv.) in analytical-grade toluene (15 mL) was stirred at room temperature for 12 hours with inert nitrogen atmosphere. Then 1,3-propanediol (457 mg, 0.43 mL, 6.00 mol, 4.0 equiv.), 46.5%  $\text{BF}_3 \cdot \text{Et}_2\text{O}$  (213 mg, 0.185 mL, 1.5 mmol, 1.0 equiv.) was added to the solution at 0 °C and stirred at room temperature for further 2 hours. The solution was quenched with saturated  $\text{NaHCO}_3$  (10 mL) and extracted with ethyl acetate (3×10 mL). The combined organic layers were washed with brine, then dried over anhydrous sodium sulfate, concentrated and purified by flash chromatography (20% ethyl acetate – petroleum ether) to obtain pure **12a'** as a light yellow viscous oil (233 mg, 62% for one pot synthesis, d.r. = 14.0:1).

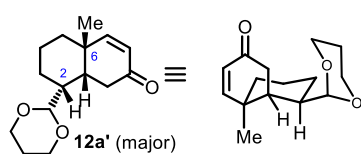

$R_f = 0.30$  (20% ethyl acetate – petroleum ether); Light yellow viscous oil;  $[\alpha]_D^{20} = +9.4$  (c = 0.60 in DCM);  $^1\text{H NMR}$ : the same to compound **12a**;  $^{13}\text{C NMR}$ : the same to compound **12a**; IR  $\nu_{\text{max}}$  2928, 2863, 1684, 1676, 1376, 1275, 1240, 1145, 1116, 1015, 934, 852, 764  $\text{cm}^{-1}$ ; HRMS–EI ( $m/z$ ):  $[\text{M}]^+$  calculated for  $\text{C}_{15}\text{H}_{22}\text{O}_3$ , 250.1569, found, 250.1571.

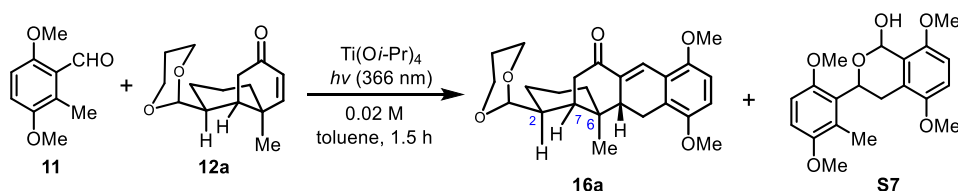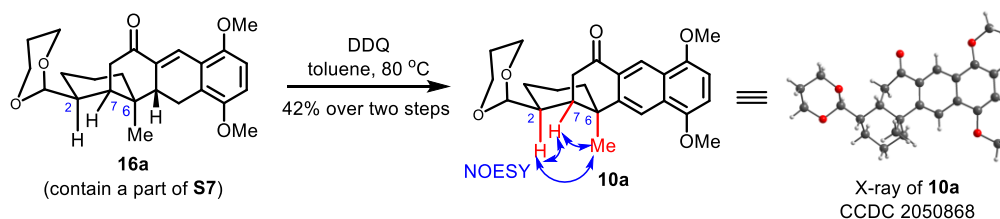

To a solution of dienophile **12a** (2.00 g, 8.00 mmol, 1.0 equiv.), aromatic aldehyde **11** (2.16 g, 12.0 mmol, 1.5 equiv.) in anhydrous and degassed toluene (400 mL) (concentration for dienophile **12a** is 0.02 M) was added titanium(IV) isopropoxide (6.82 g, 7.10 mL, 24.0 mmol, 3.0 equiv.) under  $\text{N}_2$ . After homogeneous mixing, the solution was divided into 10 parallel reactions in 10 quartz tubes (10×40 mL). 5 parallel reactions were conducted with 5 quartz tubes once. The solution was photolyzed at room temperature in a Rayonet chamber reactor (16 lamps) at  $\lambda_{\text{max}} = 366 \text{ nm}$  for 1.5 hours (**Note**: the atmosphere temperature among quartz tubes was 35 to 40 °C). After the above 5 parallel reactions were over, the reaction mixture was quenched with



saturated NaHCO<sub>3</sub> (50 mL). Then another 5 parallel reactions were conducted for another 1.5 hours, the reaction mixture was also quenched with saturated NaHCO<sub>3</sub> (50 mL). The total mixture was filtered through silica gel and washed with ethyl acetate (6×50 mL). The combined organic layers were washed with brine, then dried over anhydrous sodium sulfate, concentrated and purified by flash chromatography (10% to 30% ethyl acetate – petroleum ether) to obtain 1.80 g **16a** (contain ~ 9% **S7**) as a yellow viscous oil.

To a solution of above obtained 1.80 g **16a** (contain ~ 9% **S7**) in anhydrous toluene (40 mL) was added DDQ (1.97 g, 8.69 mmol, 2.0 equiv.) at room temperature. After stirred at 80 °C for 3 hours, the mixture was quenched with saturated Na<sub>2</sub>S<sub>2</sub>O<sub>3</sub>/NaHCO<sub>3</sub> (40 mL, v/v = 1:1) and extracted with ethyl acetate (3×50 mL). The combined organic layers were washed with water, brine, then dried over anhydrous sodium sulfate, concentrated, and purified by silica gel flash chromatography (20% ethyl acetate – petroleum ether) to obtain pure **10a** as a yellow foam solid (1.38 g, 42% over two steps).

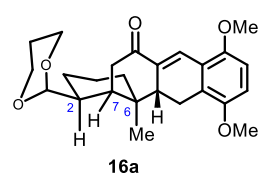

**16a**  $R_f = 0.36$  (30% ethyl acetate – petroleum ether); Yellow viscous oil;  $[\alpha]_D^{20} = +179.0$  ( $c = 1.10$  in DCM); <sup>1</sup>H NMR (400 MHz, Chloroform-*d*)  $\delta$  7.81 (d,  $J = 2.4$  Hz, 1H), 6.79 (d,  $J = 8.9$  Hz, 1H), 6.65 (d,  $J = 8.9$  Hz, 1H), 4.41 (d,  $J = 7.6$  Hz, 1H), 4.02 (dd,  $J = 11.4, 5.0$  Hz, 1H), 3.92 (dd,  $J = 11.5, 5.0$  Hz, 1H), 3.80 (s, 3H), 3.78 (s, 3H), 3.64 (td,  $J = 12.3, 2.6$  Hz, 1H), 3.41 (td,  $J = 12.0, 2.6$  Hz, 1H), 2.99 (dd,  $J = 15.7, 6.9$  Hz, 1H), 2.72 (ddd,  $J = 11.5, 6.9, 2.5$  Hz, 1H), 2.66 – 2.60 (m, 1H), 2.57 (d,  $J = 7.1$  Hz, 1H), 2.49 (dd,  $J = 17.6, 5.7$  Hz, 1H), 2.04 – 1.88 (m, 3H), 1.76 (ddd,  $J = 13.8, 7.0, 3.0$  Hz, 1H), 1.57 – 1.50 (m, 3H), 1.47 – 1.35 (m, 2H), 1.28 – 1.21 (m, 1H), 0.96 (s, 3H) ppm; <sup>13</sup>C NMR (100 MHz, Chloroform-*d*)  $\delta$  200.5, 151.7, 150.0, 134.5, 127.0, 126.4, 122.4, 112.5, 108.6, 103.6, 66.9, 66.0, 55.93, 55.91, 41.7, 40.6, 39.1, 38.3, 35.8, 35.5, 25.6, 24.8, 24.0, 21.8, 19.4 ppm; IR  $\nu_{\max}$  2957, 2925, 2863, 1675, 1599, 1576, 1484, 1465, 1275, 1267, 1110, 1098, 1003, 763, 759 cm<sup>-1</sup>; HRMS–EI ( $m/z$ ):  $[M]^+$  calculated for C<sub>25</sub>H<sub>32</sub>O<sub>5</sub>, 412.2250, found, 412.2255.

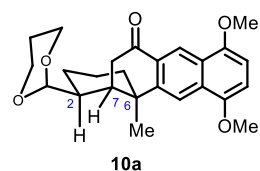

**10a**  $R_f = 0.42$  (30% ethyl acetate – petroleum ether); Yellow foam solid, m.p. 110-112 °C; Compound **10a** was recrystallized from dichloromethane at room temperature to obtain yellow crystals, CCDC 2050868;  $[\alpha]_D^{20} = +1.5$  ( $c = 1.00$  in DCM); <sup>1</sup>H NMR (400 MHz, Chloroform-*d*)  $\delta$  8.93 (s, 1H), 8.23 (s, 1H), 6.69 (d,  $J = 8.3$  Hz, 1H), 6.57 (d,  $J = 8.3$  Hz, 1H), 4.30 (d,  $J = 7.3$  Hz, 1H), 4.14 – 4.04 (m, 2H), 3.912 (s, 3H), 3.908 (s, 3H), 3.77 – 3.64 (m, 2H), 2.78 (dd,  $J = 16.6, 13.9$  Hz, 1H), 2.62 (dd,  $J = 16.7, 4.2$  Hz, 1H), 2.49 (dt,  $J = 13.9, 4.2$  Hz, 1H), 2.29 – 2.19 (m, 1H), 2.11 – 1.98 (m, 1H), 1.80 – 1.69 (m, 2H), 1.69 – 1.61 (m, 3H), 1.60 (s, 3H), 1.36 – 1.20 (m, 2H) ppm; <sup>13</sup>C NMR (100 MHz, Chloroform-*d*)  $\delta$  198.9, 150.8, 148.9, 148.6, 129.1, 128.6, 124.2, 122.5, 119.4, 105.6, 103.4, 102.7, 66.93, 66.91, 55.6, 55.5, 40.0, 38.2, 37.7, 35.9, 35.8, 25.9, 25.2, 21.4, 21.2 ppm; IR  $\nu_{\max}$  3055, 2937, 2862, 2837,

1684, 1626, 1589, 1458, 1267, 1240, 1143, 1103, 1091, 1008, 985  $\text{cm}^{-1}$ ; HRMS–EI ( $m/z$ ):  $[\text{M}]^+$  calculated for  $\text{C}_{25}\text{H}_{30}\text{O}_5$ , 410.2093, found, 410.2089.

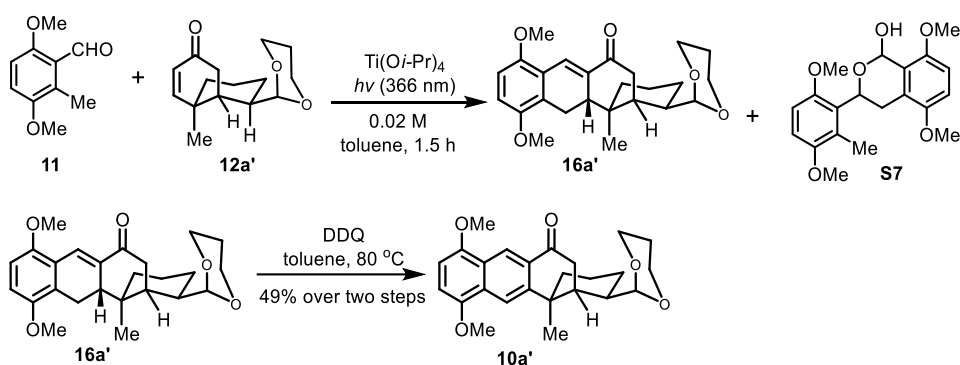

To a solution of dienophile **12a'** (200 mg, 0.80 mmol, 1.0 equiv.), aromatic aldehyde **11** (216 mg, 1.20 mmol, 1.5 equiv.) in anhydrous and degassed toluene (40 mL) (concentration for dienophile **12a'** is 0.02 M) was added titanium(IV) isopropoxide (682 mg, 0.71 mL, 2.40 mmol, 3.0 equiv.) under  $\text{N}_2$ . After homogeneous mixing, the solution was photolyzed at room temperature in a Rayonet chamber reactor (16 lamps) at  $\lambda_{\text{max}} = 366 \text{ nm}$  for 1.5 hours (**Note**: the atmosphere temperature among quartz tubes was 35 to 40  $^\circ\text{C}$ ). After that, the mixture was quenched with saturated  $\text{NaHCO}_3$  (10 mL) and filtered through silica gel and washed with ethyl acetate (6 $\times$ 10 mL). The combined organic layers were washed with brine, then dried over anhydrous sodium sulfate, concentrated and purified by flash chromatography (10% to 30% ethyl acetate – petroleum ether) to obtain 190 mg **16a'** as a yellow viscous oil.

To a solution of above obtained **16a'** (190 mg, 0.46 mmol, 1.0 equiv.) in anhydrous toluene (10 mL) was added DDQ (218 mg, 0.96 mmol, 2.0 equiv.) at room temperature. After stirred at 80  $^\circ\text{C}$  for 3 hours, the mixture was quenched with saturated  $\text{Na}_2\text{S}_2\text{O}_3/\text{NaHCO}_3$  (10 mL, v/v = 1:1) and extracted with ethyl acetate (3 $\times$ 10 mL). The combined organic layers were washed with water, brine, then dried over anhydrous sodium sulfate, concentrated, and purified by silica gel flash chromatography (20% ethyl acetate – petroleum ether) to obtain **10a'** as a yellow foam solid (161 mg, 49 % over two steps).

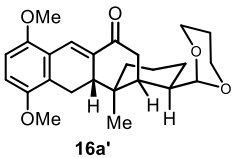 **16a'**  $R_f = 0.36$  (30% ethyl acetate – petroleum ether); Yellow viscous oil;  $[\alpha]_{\text{D}}^{20} = -144.9$  ( $c = 0.40$  in DCM);  $^1\text{H NMR}$ : the same to **16a**;  $^{13}\text{C NMR}$ : the same to **16a**; IR  $\nu_{\text{max}}$  2960, 2925, 2857, 1691, 1675, 1598, 1570, 1483, 1464, 1275, 1260, 1144, 1096, 1016, 802, 799  $\text{cm}^{-1}$ ; HRMS–EI ( $m/z$ ):  $[\text{M}]^+$  calculated for  $\text{C}_{25}\text{H}_{32}\text{O}_5$ , 412.2250, found, 412.2248.

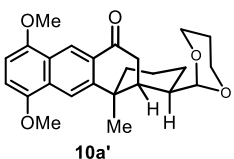 **10a'**  $R_f = 0.42$  (30% ethyl acetate – petroleum ether); Yellow foam solid, m.p. 57-59  $^\circ\text{C}$ ;  $[\alpha]_{\text{D}}^{20} = -4.4$  ( $c = 0.60$  in DCM);  $^1\text{H NMR}$ : the same to **10a**;  $^{13}\text{C NMR}$ : the same to **10a**; IR  $\nu_{\text{max}}$  2954, 2930, 2927, 2857, 1683, 1627, 1590, 1458, 1435, 1343, 1333, 1268, 1239, 1142, 1119, 1104, 1092, 1009, 934  $\text{cm}^{-1}$ ; HRMS–EI ( $m/z$ ):  $[\text{M}]^+$  calculated for  $\text{C}_{25}\text{H}_{30}\text{O}_5$ , 410.2093, found, 410.2097.

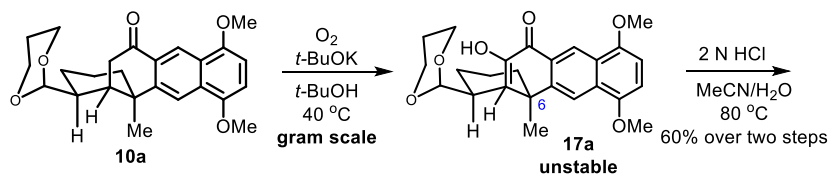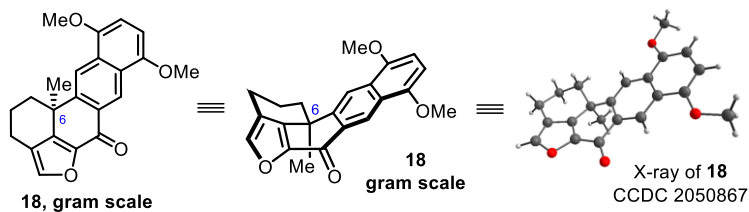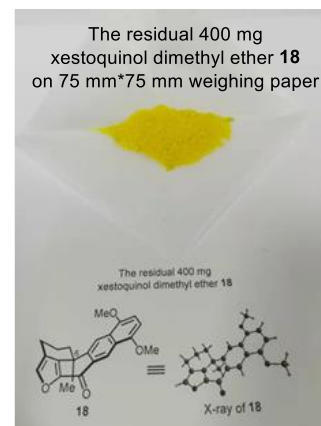

To a solution of  $\text{10a}$  (1.31 g, 3.2 mmol, 1.0 equiv.) in analytical-grade *t*-BuOH (60 mL) was added *t*-BuOK (3.60 g, 32.0 mmol, 10.0 equiv.). Then the mixture was stirred with bubbling  $\text{O}_2$  into the mixture at 40 °C for 3 hours. After that, *t*-BuOH was evacuated and the mixture was diluted with ethyl acetate (50 mL) and water (30 mL). Separated the organic layer and the aqueous layer was washed with ethyl acetate (3×50 mL). The combined organic layers were washed with water, brine, dried over anhydrous sodium sulfate, then concentrated to obtain 1.12 g crude  $\text{17a}$  as a yellow foam solid for the next step without further purification.

To a solution of above obtained crude  $\text{17a}$  in analytical-grade MeCN (60 mL) was added 2 N HCl (10 mL) at room temperature. Then the solution was stirred at 80 °C for 5 hours and quenched with saturated  $\text{NaHCO}_3$  (50 mL). The mixture was extracted with DCM (3×60 mL) and washed with brine. The combined organic layers were dried over anhydrous sodium sulfate, concentrated, and purified by silica gel flash chromatography (20% to 30% ethyl acetate – petroleum ether) to obtain  $\text{18}$  as a yellow solid (668 mg, 60% over two steps). **Note:** The xestoquinol dimethyl ether  $\text{18}$  was easier to dissolve in DCM than ethyl acetate.

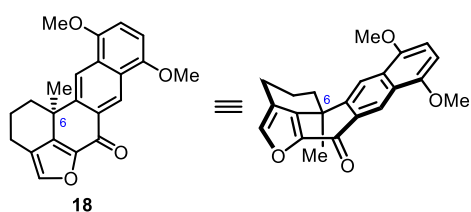

$R_f = 0.38$  (30% ethyl acetate – petroleum ether); Yellow solid, m.p. 243–245 °C; Compound  $\text{18}$  was recrystallized from THF/hexane (*v/v* = 1/2) at room temperature to obtain yellow crystals, CCDC 2050867;  $[\alpha]_D^{20} = +99.6$  (*c* = 1.00 in DCM);  $^1\text{H NMR}$  (400 MHz, Chloroform-*d*)  $\delta$  9.23 (s, 1H), 8.23 (s, 1H), 7.42 (t, *J* = 1.4 Hz, 1H), 6.73 (d, *J* = 8.3 Hz, 1H), 6.63 (d, *J* = 8.4 Hz, 1H), 3.93 (s, 3H), 3.92 (s, 3H), 2.81 (ddt, *J* = 16.9, 7.8, 1.7 Hz, 1H), 2.61 – 2.50 (m, 2H), 2.29 – 2.14 (m, 1H), 2.13 – 2.02 (m, 1H), 1.76 (td, *J* = 13.2, 4.3 Hz, 1H), 1.49 (s, 3H) ppm;  $^{13}\text{C NMR}$  (100 MHz, Chloroform-*d*)  $\delta$  172.7, 150.6, 148.6, 146.7, 146.6, 144.6, 143.6, 131.2, 127.2, 124.5, 123.9, 121.2, 117.4, 105.9, 103.2, 55.6, 55.5, 36.2, 33.6, 31.9, 18.6, 17.1 ppm; IR  $\nu_{\text{max}}$  2938, 2835, 1670, 1614, 1541, 1471, 1465, 1423, 1356, 1267, 1244, 1192, 1144, 1091, 1043, 904, 862, 806  $\text{cm}^{-1}$ ; HRMS–EI (*m/z*):  $[\text{M}]^+$  calculated for  $\text{C}_{22}\text{H}_{20}\text{O}_4$ , 348.1362, found, 348.1360.

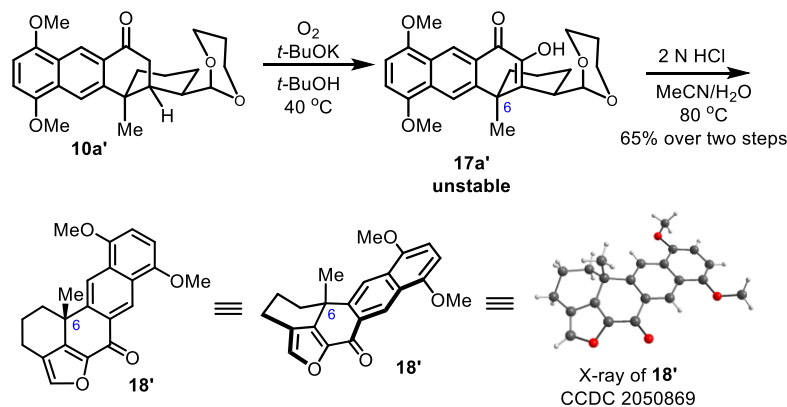

The enantiomer compound **18'** (136 mg, 65% over two steps) was synthesized according to the above similar procedures using **10a'** (246 mg, 0.60 mmol, 1.0 equiv.) as starting material. **Note:** The xestoquinol dimethyl ether **18'** was easier to dissolve in DCM than ethyl acetate.

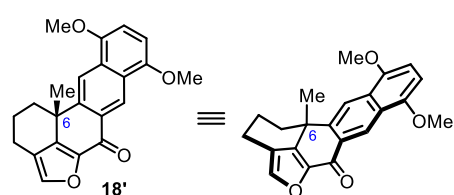

$R_f = 0.38$  (30% ethyl acetate – petroleum ether); Yellow solid, m.p. 248–250  $^\circ\text{C}$ ; Compound **18'** was recrystallized from THF/hexane ( $v/v = 1/2$ ) at room temperature to obtain yellow crystals, CCDC 2050869;  $[\alpha]_D^{20} = -95.4$  ( $c = 1.00$  in DCM);  $^1\text{H NMR}$ : the same to **18**;  $^{13}\text{C NMR}$ : the same to **18**; IR  $\nu_{\text{max}}$  3102, 2944, 2836, 1666, 1628, 1613, 1533, 1464, 1423, 1357, 1267, 1245, 1190, 1145, 1089, 1044, 905, 865, 802  $\text{cm}^{-1}$ ; HRMS–EI ( $m/z$ ):  $[\text{M}]^+$  calculated for  $\text{C}_{22}\text{H}_{20}\text{O}_4$ , 348.1362, found, 348.1360.

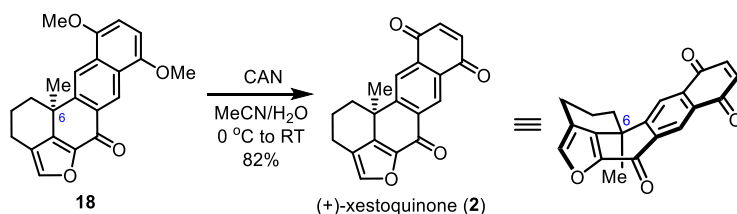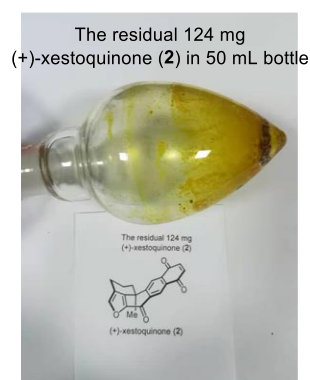

To stirred solution of **18** (208 mg, 0.6 mmol, 1.0 equiv.) in  $\text{MeCN}/\text{H}_2\text{O}$  (50 mL,  $v/v = 4:1$ ) was added CAN (987 mg, 1.8 mmol, 3.0 equiv.) at  $0\text{ }^\circ\text{C}$ . Then the solution was stirred at room temperature for 1 hours. After that, the mixture was extracted with ethyl acetate ( $3 \times 30\text{ mL}$ ). The combined organic layers were washed with water, brine, dried over anhydrous sodium sulfate, concentrated, and purified by silica gel flash chromatography (30% ethyl acetate – petroleum ether) to obtain (+)-xestoquinone (**2**) as a yellow-brown solid (156 mg, 82%).

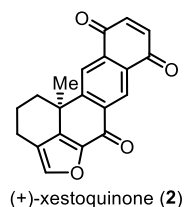

$R_f = 0.26$  (30% ethyl acetate – petroleum ether); Yellow-brown solid, m.p. 213-216 °C;  $[\alpha]_D^{20} = +11.2$  ( $c = 1.00$  in DCM);  $^1\text{H NMR}$  (500 MHz, Chloroform- $d$ )  $\delta$  8.98 (s, 1H), 8.22 (s, 1H), 7.54 (br t,  $J = 1.5$  Hz, 1H), 7.05 (d,  $J = 10.0$  Hz, 1H), 7.02 (d,  $J = 10.0$  Hz, 1H), 2.89 (ddt,  $J = 17.1$ , 8.0, 1.8 Hz, 1H), 2.66 (dddd,  $J = 17.0$ , 10.0, 8.5, 1.5 Hz, 1H), 2.58 (dt,  $J = 12.9$ , 3.6 Hz, 1H), 2.35 – 2.24 (m, 1H), 2.23 – 2.15 (m, 1H), 1.76 (td,  $J = 13.1$ , 4.4 Hz, 1H), 1.53 (s, 3H) ppm;  $^{13}\text{C NMR}$  (125 MHz, Chloroform- $d$ )  $\delta$  184.6, 183.8, 170.1, 156.2, 147.3, 145.0, 144.0, 139.3, 138.7, 137.9, 133.2, 130.3, 126.9, 123.2, 121.6, 37.4, 32.6, 31.2, 18.4, 16.9 ppm; IR  $\nu_{\text{max}}$  3105, 2862, 1670, 1614, 1456, 1444, 1319, 1267, 1238, 1134, 1095, 898, 846, 796  $\text{cm}^{-1}$ ; HRMS–EI ( $m/z$ ):  $[\text{M}]^+$  calculated for  $\text{C}_{20}\text{H}_{14}\text{O}_4$ , 318.0892, found, 318.0889.

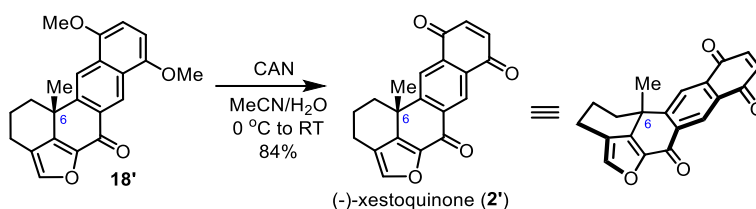

The (-)-xestoquinone (**2'**) (40 mg, 84%) was synthesized according to the above similar procedures using **18'** (52 mg, 0.15 mmol, 1.0 equiv.) as starting material.

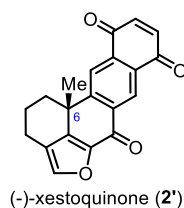

$R_f = 0.26$  (30% ethyl acetate – petroleum ether); Yellow-brown solid, m.p. 96 - 98 °C;  $[\alpha]_D^{20} = -8.2$  ( $c = 1.00$  in DCM);  $^1\text{H NMR}$ : the same to **2**;  $^{13}\text{C NMR}$ : the same to **2**; IR  $\nu_{\text{max}}$  2953, 2926, 2856, 1669, 1602, 1539, 1444, 1430, 1318, 1274, 1236, 1134, 1092, 1058, 986, 845, 764  $\text{cm}^{-1}$ ; HRMS–EI ( $m/z$ ):  $[\text{M}]^+$  calculated for  $\text{C}_{20}\text{H}_{14}\text{O}_4$ , 318.0892, found, 318.0894.

**Table S3.** Screening conditions of the late-stage cyclization.

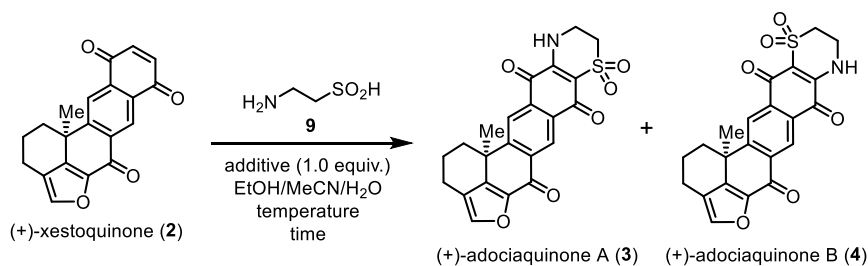

| entry          | additive                             | temperature/time | ratio of <b>3</b> : <b>4</b> <sup>a</sup> | combined yield <sup>a</sup> |
|----------------|--------------------------------------|------------------|-------------------------------------------|-----------------------------|
| 1              | --                                   | -20 °C / 6 h     | 1:2.5                                     | 28%                         |
| 2              | --                                   | 0 °C / 3 h       | 1:2.2                                     | 28%                         |
| 3              | --                                   | 20 °C / 1 h      | 1:2.3                                     | 33%                         |
| 4 <sup>b</sup> | --                                   | 50 °C / 3 h      | 1:3.0                                     | 84% <sup>c</sup>            |
| 5              | CeCl <sub>3</sub> ·7H <sub>2</sub> O | 50 °C / 1 h      | 1:2.2                                     | 52%                         |
| 6              | TFA                                  | 50 °C / 1 h      | 1:1.1                                     | 13%                         |
| 7              | Cs <sub>2</sub> CO <sub>3</sub>      | 50 °C / 1 h      | --                                        | messy, N.D.                 |
| 8              | NEt <sub>3</sub>                     | 50 °C / 1 h      | 1:2.5                                     | 18%                         |

All reactions were performed using (+)-xestoquinone (**2**) (3.2 mg, 0.01 mmol, 1.0 equiv.) and hypotauroine **9** (1.7 mg, 0.015 mmol, 1.5 equiv.) as starting materials in EtOH/MeCN/H<sub>2</sub>O (0.5 mL, v/v/v = 2:2:1), unless otherwise noted. <sup>a</sup>The ratios of **3**:**4** and combined yields were determined from crude  $^1\text{H NMR}$  spectrum of **3**+**4** using CH<sub>2</sub>Br<sub>2</sub> as an internal standard, <sup>b</sup>(+)-xestoquinone (**2**) (32 mg, 0.1 mmol, 1.0 equiv.) and hypotauroine **9** (17 mg, 0.15 mmol, 1.5 equiv.) in EtOH/MeCN/H<sub>2</sub>O (5 mL, v/v/v = 2:2:1); <sup>c</sup> isolated combined yield of **3**+**4**.

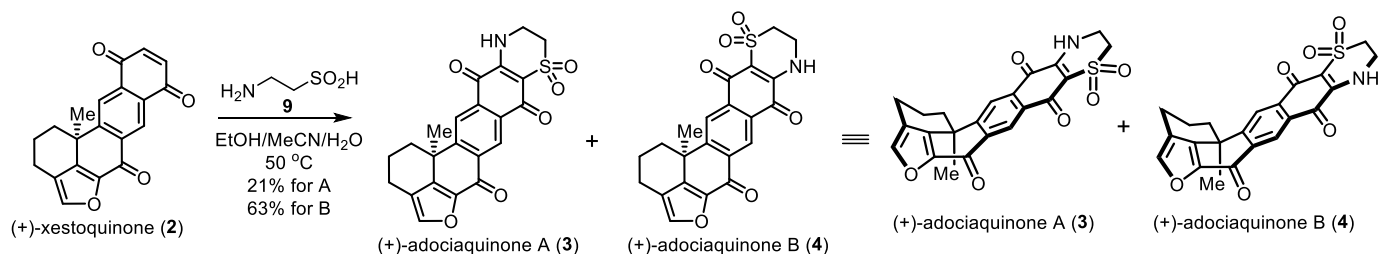

The obtained 9 mg  
(+)-adociaquinone A (3) in 25 mL bottle

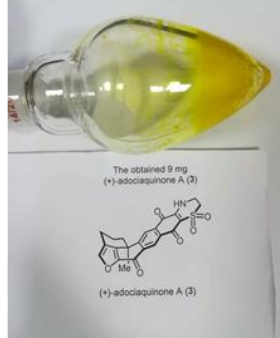

The obtained 27 mg  
(+)-adociaquinone B (4) in 50 mL bottle

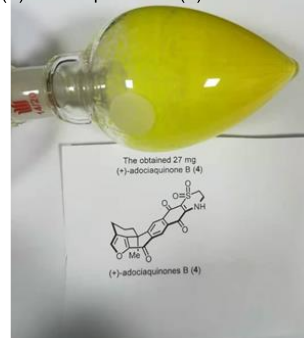

To a stirred solution of (+)-xestoquinone (2) (32 mg, 0.1 mmol, 1.0 equiv.) in EtOH/MeCN/H<sub>2</sub>O (5 mL, v/v/v = 2:2:1) was added hypotaurine 9 (17 mg, 0.15 mmol, 1.5 equiv.) at room temperature. Then the solution was stirred at 50 °C for 3 hours. TLC analysis showed all (+)-xestoquinone (2) was consumed. The solvent was evacuated under vacuum, and the residue was purified by preparation lamella chromatography (7% MeOH-DCM, washed with 10% MeOH-DCM) directly to afford yellow solid (+)-adociaquinone A (3) (9.0 mg, 21%), (+)-adociaquinone B (4) (27.0 mg, 63%).

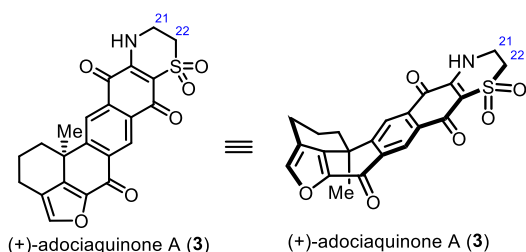

$R_f = 0.52$  (10% methanol-dichloromethane); Yellow solid, m.p. >320 °C (decomposed);  $[\alpha]_D^{20} = +65.2$  (c = 0.1 in chloroform-methanol (v/v = 2:1)); <sup>1</sup>H NMR (500 MHz, DMSO-*d*<sub>6</sub>) δ 9.35 (br s, 1H, NH), 8.68 (s, 1H), 8.26 (s, 1H), 8.00 (s, 1H), 3.88 (t, *J* = 6.0 Hz, 2H), 3.40 (t, *J* = 6.0 Hz, 2H), 2.84 (dd, *J* = 17.0, 8.0 Hz, 1H), 2.64 – 2.60 (m, 1H), 2.60 – 2.57 (m, 1H), 2.30 – 2.16 (m, 1H), 2.13 – 2.03 (m, 1H), 1.65 (td, *J* = 13.0, 4.4 Hz, 1H), 1.50 (s, 3H) ppm; <sup>13</sup>C NMR (125 MHz, DMSO-*d*<sub>6</sub>) δ 177.9, 173.8, 169.4, 157.4, 147.8, 147.2, 146.2, 143.0, 136.0, 134.4, 128.6, 125.4, 123.0, 121.7, 111.7, 48.2, 39.4 (C21, buried in the peak of DMSO-*d*<sub>6</sub>), 37.2, 31.8, 30.3, 17.9, 16.3 ppm; IR  $\nu_{\text{max}}$  3270, 2928, 2858, 1668, 1655, 1589, 1508, 1458, 1344, 1282, 1238, 1116, 1028, 864 cm<sup>-1</sup>; HRMS–ESI (*m/z*): [M+Na]<sup>+</sup> calculated for C<sub>22</sub>H<sub>17</sub>NO<sub>6</sub>SN<sup>+</sup>, 446.0669, found, 446.0663.

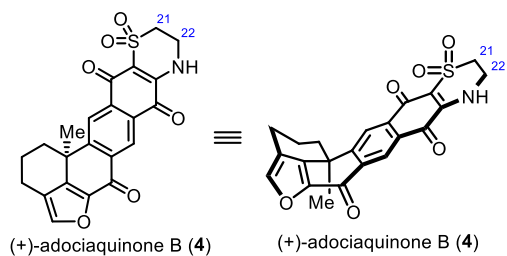

$R_f = 0.48$  (10% methanol-dichloromethane); Yellow solid, m.p.  $>320$  °C (decomposed);  $[\alpha]_D^{20} = +100.4$  ( $c = 0.05$  in chloroform-methanol (v/v = 2:1));  $^1\text{H NMR}$  (500 MHz,  $\text{DMSO-}d_6$ )  $\delta$  9.24 (br s, 1H, NH), 8.72 (s, 1H), 8.28 (s, 1H), 8.00 (s, 1H), 3.88 (t,  $J = 5.9$  Hz, 2H), 3.40 (t,  $J = 5.9$  Hz, 2H), 2.84 (dd,  $J = 17.1, 7.9$  Hz, 1H), 2.65 (dd,  $J = 13.2, 4.1$  Hz, 1H), 2.59 (dd,  $J = 17.4, 8.9$  Hz, 1H), 2.28 – 2.15 (m, 1H), 2.12 – 2.01 (m, 1H), 1.63 (td,  $J = 12.9, 4.3$  Hz, 1H), 1.50 (s, 3H) ppm;  $^{13}\text{C NMR}$  (125 MHz,  $\text{DMSO-}d_6$ )  $\delta$  178.3, 173.7, 169.4, 154.6, 147.9, 147.1, 146.2, 143.0, 137.9, 131.8, 130.8, 124.7, 123.4, 121.6, 111.3, 48.2, 39.3 (C22, buried in the peak of  $\text{DMSO-}d_6$ ), 36.8, 31.6, 30.3, 17.8, 16.2 ppm; IR  $\nu_{\text{max}}$  3274, 2935, 2862, 1716, 1664, 1616, 1541, 1508, 1458, 1267, 1240, 1143, 935, 864, 806  $\text{cm}^{-1}$ ; HRMS–ESI ( $m/z$ ):  $[\text{M}+\text{Na}]^+$  calculated for  $\text{C}_{22}\text{H}_{17}\text{NO}_6\text{SNa}^+$ , 446.0669, found, 446.0662.

**Note:** The (+)-adociaquinones A (3) and B (4) were uneasy to dissolve in organic solution, especially for the major product (+)-adociaquinone B (4), which was uneasy to dissolve in  $\text{DMSO-}d_6$ .

**Comparison of NMR spectroscopic data of natural and synthetic (+)-xestoquinone (2), (+)-adociaquinones A (3) and B (4)**

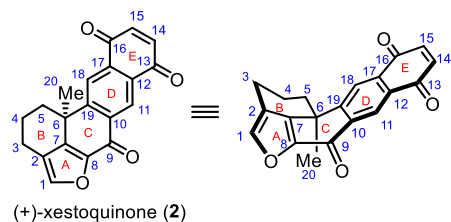

Natural product (+)-xestoquinone:  $[\alpha]_D^{25} = +17.2$  ( $c = 1.16$  in DCM) <sup>[3]</sup>

Our Synthetic (+)-xestoquinone:  $[\alpha]_D^{20} = +11.2$  ( $c = 1.00$  in DCM)

**Table S4.** Comparison of <sup>1</sup>H NMR spectroscopic data of natural <sup>[4]</sup> and synthetic <sup>[5]</sup> (+)-xestoquinone with this synthetic work.

| position | natural (a)<br>(Laurent's work)<br>$\delta$ <sup>1</sup> H [ppm; mult;<br><i>J</i> (Hz)], 300 MHz,<br>Chloroform- <i>d</i> | synthetic (b)<br>(Harada's work)<br>$\delta$ <sup>1</sup> H [ppm; mult;<br><i>J</i> (Hz)], 400 MHz,<br>Chloroform- <i>d</i> | synthetic (c)<br>(this work)<br>$\delta$ <sup>1</sup> H [ppm; mult;<br><i>J</i> (Hz)], 500 MHz,<br>Chloroform- <i>d</i> | deviation<br>(a-c; b-c)<br>$\Delta\delta$ (ppm) |
|----------|----------------------------------------------------------------------------------------------------------------------------|-----------------------------------------------------------------------------------------------------------------------------|-------------------------------------------------------------------------------------------------------------------------|-------------------------------------------------|
| 1        | 7.54; t; 1.5                                                                                                               | 7.54; br t; 1.5                                                                                                             | 7.54; br t; 1.5                                                                                                         | 0.00; 0.00                                      |
| 3a       | 2.64; dddd; 17.1, 9.8,<br>8.4, 1.5                                                                                         | 2.64; dddd; 17.0, 9.9,<br>8.4, 1.5                                                                                          | 2.66; dddd; 17.0,<br>10.0, 8.5, 1.5                                                                                     | -0.02; -0.02                                    |
| 3b       | 2.88; dddd; 17.1, 8.0,<br>2.5, 1.5                                                                                         | 2.88; dddd; 17.0, 8.0,<br>2.2, 1.5                                                                                          | 2.89; ddt; 17.1, 8.0,<br>1.8                                                                                            | -0.01; -0.01                                    |
| 4        | 2.22; m, 2H                                                                                                                | 2.28; m, 1H<br>2.19; m, 1H                                                                                                  | 2.29; m, 1H<br>2.19; m, 1H                                                                                              | -0.07, 0.03;<br>-0.01, 0.00                     |
| 5a       | 1.75; ddd; 13.0, 13.0,<br>4.7                                                                                              | 1.76; ddd; 13.0, 13.0,<br>4.5                                                                                               | 1.76; td; 13.1, 4.4                                                                                                     | -0.01; 0.00                                     |
| 5b       | 2.57; ddd; 12.8, 3.6,<br>3.6                                                                                               | 2.58; ddd; 13.0, 4.1,<br>3.0                                                                                                | 2.58; dt; 12.9, 3.6                                                                                                     | -0.01; 0.00                                     |
| 11       | 9.03; s                                                                                                                    | 9.05; s                                                                                                                     | 8.98; s                                                                                                                 | 0.05; 0.07                                      |
| 14       | 7.02; s, 2H                                                                                                                | 7.06; d; 10.4                                                                                                               | 7.05; d; 10.0                                                                                                           | -0.03, 0.00;                                    |
| 15       |                                                                                                                            | 7.03; d; 10.4                                                                                                               | 7.02; d; 10.0                                                                                                           | 0.01, 0.01                                      |
| 18       | 8.23; s                                                                                                                    | 8.25; s                                                                                                                     | 8.22; s                                                                                                                 | 0.01; 0.03                                      |
| 20       | 1.53; s                                                                                                                    | 1.54; s                                                                                                                     | 1.53; s                                                                                                                 | 0.00; 0.01                                      |



**Table S5.** Comparison of  $^{13}\text{C}$  NMR spectroscopic data of natural  $^{[4]}$  (+)-xestoquinone with this synthetic work.

| <b>position</b> | <b>natural (a)</b><br><b>(Laurent's work)</b><br>$\delta^{13}\text{C}$ [ppm], 75 MHz,<br>Chloroform- <i>d</i> | <b>synthetic (b)</b><br><b>(this work)</b><br>$\delta^{13}\text{C}$ [ppm], 125 MHz,<br>Chloroform- <i>d</i> | <b>deviation</b><br><b>(a-b)</b><br>$\Delta\delta$ (ppm) |
|-----------------|---------------------------------------------------------------------------------------------------------------|-------------------------------------------------------------------------------------------------------------|----------------------------------------------------------|
| 1               | 145.0                                                                                                         | 145.0                                                                                                       | 0.0                                                      |
| 2               | 121.5                                                                                                         | 121.6                                                                                                       | -0.1                                                     |
| 3               | 16.9                                                                                                          | 16.9                                                                                                        | 0.0                                                      |
| 4               | 18.4                                                                                                          | 18.4                                                                                                        | 0.0                                                      |
| 5               | 31.2                                                                                                          | 31.2                                                                                                        | 0.0                                                      |
| 6               | 37.4                                                                                                          | 37.4                                                                                                        | 0.0                                                      |
| 7               | 147.3                                                                                                         | 147.3                                                                                                       | 0.0                                                      |
| 8               | 144.0                                                                                                         | 144.0                                                                                                       | 0.0                                                      |
| 9               | 170.3                                                                                                         | 170.1                                                                                                       | 0.2                                                      |
| 10              | 137.9                                                                                                         | 137.9                                                                                                       | 0.0                                                      |
| 11              | 127.0                                                                                                         | 126.9                                                                                                       | 0.1                                                      |
| 12              | 130.3                                                                                                         | 130.3                                                                                                       | 0.0                                                      |
| 13              | 183.9                                                                                                         | 183.8                                                                                                       | 0.1                                                      |
| 14              | 139.4                                                                                                         | 139.3                                                                                                       | 0.1                                                      |
| 15              | 138.7                                                                                                         | 138.7                                                                                                       | 0.0                                                      |
| 16              | 184.7                                                                                                         | 184.6                                                                                                       | 0.1                                                      |
| 17              | 133.2                                                                                                         | 133.2                                                                                                       | 0.0                                                      |
| 18              | 123.2                                                                                                         | 123.2                                                                                                       | 0.0                                                      |
| 19              | 156.2                                                                                                         | 156.2                                                                                                       | 0.0                                                      |
| 20              | 32.6                                                                                                          | 32.6                                                                                                        | 0.0                                                      |

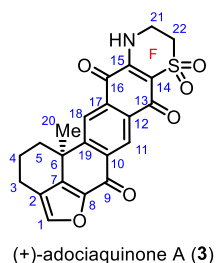

Natural product (+)-adociaquinone A:  $[\alpha]_{\text{D}} = +31.7$  ( $c = 4.66$  in MeCN) <sup>[6]</sup>

Harada's Synthetic (+)-adociaquinone A:  $[\alpha]_{\text{D}}^{20} = +70$  ( $c = 0.107$  in chloroform -methanol  
(v/v = 2:1)) <sup>[7]</sup>

Our Synthetic (+)-adociaquinone A:  $[\alpha]_{\text{D}}^{20} = +65.2$  ( $c = 0.1$  in chloroform -methanol (v/v =  
2:1))

**Table S6.** Comparison of <sup>1</sup>H NMR spectroscopic data of natural <sup>[6]</sup> and synthetic <sup>[7]</sup> (+)-adociaquinone A with this synthetic work.

| position | natural (a)<br>(Ireland's work)<br>$\delta^1\text{H}$ [ppm; mult;<br>$J$ (Hz)], 500 MHz,<br>DMSO- <i>d</i> <sub>6</sub> | synthetic (b)<br>(Harada's work)<br>$\delta^1\text{H}$ [ppm; mult;<br>$J$ (Hz)], 500 MHz,<br>DMSO- <i>d</i> <sub>6</sub> | synthetic (c)<br>(this work)<br>$\delta^1\text{H}$ [ppm; mult;<br>$J$ (Hz)], 500 MHz,<br>DMSO- <i>d</i> <sub>6</sub> | deviation<br>(a-c; b-c)<br>$\Delta\delta$ (ppm) |
|----------|-------------------------------------------------------------------------------------------------------------------------|--------------------------------------------------------------------------------------------------------------------------|----------------------------------------------------------------------------------------------------------------------|-------------------------------------------------|
| 1        | 7.97; s                                                                                                                 | 8.00; s                                                                                                                  | 8.00; s                                                                                                              | -0.03; 0.00                                     |
| 3a       | 2.56; dd; 17.0, 9.0                                                                                                     | 2.60; m                                                                                                                  | 2.59; m                                                                                                              | -0.03; 0.01                                     |
| 3b       | 2.82; dd; 17.0, 8.5                                                                                                     | 2.84; dd; 17.4, 8.2,                                                                                                     | 2.84; dd; 17.0, 8.0                                                                                                  | -0.02; 0.00                                     |
| 4a       | 2.06; m                                                                                                                 | 2.08; m                                                                                                                  | 2.08; m                                                                                                              | -0.02; 0.00                                     |
| 4b       | 2.21; m                                                                                                                 | 2.23; m                                                                                                                  | 2.22; m                                                                                                              | -0.01; 0.01                                     |
| 5a       | 1.63; dt; 13.0, 4.5                                                                                                     | 1.66; ddd; 12.9, 12.9,<br>4.2                                                                                            | 1.65; td; 13.0, 4.4                                                                                                  | -0.02; 0.01                                     |
| 5b       | 2.60; m                                                                                                                 | 2.60; m                                                                                                                  | 2.61; m                                                                                                              | -0.01; -0.01                                    |
| 11       | 8.65; s                                                                                                                 | 8.69; s                                                                                                                  | 8.68; s                                                                                                              | -0.03; 0.01                                     |
| 18       | 8.24; s                                                                                                                 | 8.26; s                                                                                                                  | 8.26; s                                                                                                              | -0.02; 0.00                                     |
| 20       | 1.48; s                                                                                                                 | 1.50; s                                                                                                                  | 1.50; s                                                                                                              | -0.02; 0.00                                     |
| 21       | 3.87; m                                                                                                                 | 3.88; br s                                                                                                               | 3.88; t; 6.0                                                                                                         | -0.01; 0.00                                     |
| 22       | 3.39; t; 6.0                                                                                                            | 3.40; t; 6.0                                                                                                             | 3.40; t; 6.0                                                                                                         | -0.01; 0.00                                     |
| NH       | 9.33; br s                                                                                                              | 9.34; br s                                                                                                               | 9.35; br s                                                                                                           | -0.02; -0.01                                    |

**Table S7.** Comparison of  $^{13}\text{C}$  NMR spectroscopic data of natural <sup>[6]</sup> and synthetic <sup>[7]</sup> (+)-adociaquinone A with this synthetic work.

| <b>position</b> | <b>natural (a)</b><br><b>(Ireland's work)</b><br>$\delta^{13}\text{C}$ [ppm], 125<br>MHz, DMSO- $d_6$ | <b>synthetic (b)</b><br><b>(Harada's work)</b><br>$\delta^{13}\text{C}$ [ppm], 125<br>MHz, DMSO- $d_6$ | <b>synthetic (c)</b><br><b>(this work)</b><br>$\delta^{13}\text{C}$ [ppm], 125<br>MHz, DMSO- $d_6$ | <b>deviation</b><br><b>(a-c)</b><br>$\Delta\delta$ (ppm) |
|-----------------|-------------------------------------------------------------------------------------------------------|--------------------------------------------------------------------------------------------------------|----------------------------------------------------------------------------------------------------|----------------------------------------------------------|
| 1               | 146.2                                                                                                 | --                                                                                                     | 146.2                                                                                              | 0.0                                                      |
| 2               | 121.6                                                                                                 | --                                                                                                     | 121.7                                                                                              | -0.1                                                     |
| 3               | 16.3                                                                                                  | --                                                                                                     | 16.3                                                                                               | 0.0                                                      |
| 4               | 17.8                                                                                                  | --                                                                                                     | 17.9                                                                                               | -0.1                                                     |
| 5               | 30.3                                                                                                  | --                                                                                                     | 30.3                                                                                               | 0.0                                                      |
| 6               | 37.2                                                                                                  | --                                                                                                     | 37.2                                                                                               | 0.0                                                      |
| 7               | 147.7                                                                                                 | --                                                                                                     | 147.8                                                                                              | -0.1                                                     |
| 8               | 143.0                                                                                                 | --                                                                                                     | 143.0                                                                                              | 0.0                                                      |
| 9               | 169.3                                                                                                 | --                                                                                                     | 169.4                                                                                              | -0.1                                                     |
| 10              | 135.9                                                                                                 | --                                                                                                     | 136.0                                                                                              | -0.1                                                     |
| 11              | 125.4                                                                                                 | --                                                                                                     | 125.4                                                                                              | 0.0                                                      |
| 12              | 128.6                                                                                                 | --                                                                                                     | 128.6                                                                                              | 0.0                                                      |
| 13              | 173.7                                                                                                 | --                                                                                                     | 173.8                                                                                              | -0.1                                                     |
| 14              | 111.7                                                                                                 | --                                                                                                     | 111.7                                                                                              | 0.0                                                      |
| 15              | 147.2                                                                                                 | --                                                                                                     | 147.2                                                                                              | 0.0                                                      |
| 16              | 177.9                                                                                                 | --                                                                                                     | 177.9                                                                                              | 0.0                                                      |
| 17              | 134.4                                                                                                 | --                                                                                                     | 134.4                                                                                              | 0.0                                                      |
| 18              | 122.9                                                                                                 | --                                                                                                     | 123.0                                                                                              | -0.1                                                     |
| 19              | 157.3                                                                                                 | --                                                                                                     | 157.4                                                                                              | -0.1                                                     |
| 20              | 31.8                                                                                                  | --                                                                                                     | 31.8                                                                                               | 0.0                                                      |
| 21              | 39.4                                                                                                  | --                                                                                                     | 39.4, buried in the<br>peak of DMSO- $d_6$                                                         | 0.0                                                      |
| 22              | 48.2                                                                                                  | --                                                                                                     | 48.2                                                                                               | 0.0                                                      |

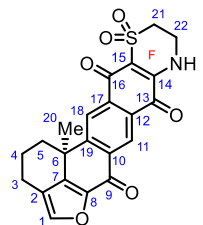

(+)-adociaquinone B (4)

Natural product (+)-adociaquinone B:  $[\alpha]_D = +21.5$  ( $c = 1.86$  in MeCN) <sup>[6]</sup>

Harada's Synthetic (+)-adociaquinone B:  $[\alpha]_D^{20} = +74$  ( $c = 0.0668$  in chloroform -methanol  
( $v/v = 2:1$ )) <sup>[7]</sup>

Our Synthetic (+)-adociaquinone B:  $[\alpha]_D^{20} = +100.4$  ( $c = 0.05$  in chloroform -methanol ( $v/v$   
 $= 2:1$ ))

**Table S8.** Comparison of <sup>1</sup>H NMR spectroscopic data of natural <sup>[6]</sup> and synthetic <sup>[7]</sup> (+)-adociaquinone B with this synthetic work.

| position | natural (a)<br>(Ireland's work)<br>$\delta$ <sup>1</sup> H [ppm; mult;<br><i>J</i> (Hz)], 500 MHz,<br>DMSO- <i>d</i> <sub>6</sub> | synthetic (b)<br>(Harada's work)<br>$\delta$ <sup>1</sup> H [ppm; mult;<br><i>J</i> (Hz)], 500 MHz,<br>DMSO- <i>d</i> <sub>6</sub> | synthetic (c)<br>(this work)<br>$\delta$ <sup>1</sup> H [ppm; mult;<br><i>J</i> (Hz)], 500 MHz,<br>DMSO- <i>d</i> <sub>6</sub> | deviation<br>(a-c; b-c)<br>$\Delta\delta$ (ppm) |
|----------|-----------------------------------------------------------------------------------------------------------------------------------|------------------------------------------------------------------------------------------------------------------------------------|--------------------------------------------------------------------------------------------------------------------------------|-------------------------------------------------|
| 1        | 7.99; s                                                                                                                           | 8.00; s                                                                                                                            | 8.00; s                                                                                                                        | -0.01; 0.00                                     |
| 3a       | 2.58; dd; 16.5, 8.5                                                                                                               | 2.59; dd; 16.9, 9.0                                                                                                                | 2.59; dd; 17.4, 8.9                                                                                                            | -0.01; 0.00                                     |
| 3b       | 2.83; dd; 16.5, 7.5                                                                                                               | 2.84; dd; 16.9, 7.7                                                                                                                | 2.84; dd; 17.1, 7.9                                                                                                            | -0.01; 0.00                                     |
| 4a       | 2.05; m                                                                                                                           | 2.07; m                                                                                                                            | 2.07; m                                                                                                                        | -0.02; 0.00                                     |
| 4b       | 2.20; m                                                                                                                           | 2.21; m                                                                                                                            | 2.21; m                                                                                                                        | -0.01; 0.00                                     |
| 5a       | 1.62; dt; 13.0, 4.0                                                                                                               | 1.63; ddd; 12.8, 12.8,<br>4.2                                                                                                      | 1.63; td; 12.9, 4.3                                                                                                            | -0.01; 0.00                                     |
| 5b       | 2.64; m                                                                                                                           | 2.65; ddd; 12.8, 3.0,<br>3.0                                                                                                       | 2.65; dd; 13.2, 4.1                                                                                                            | -0.01; 0.00                                     |
| 11       | 8.70; s                                                                                                                           | 8.72; s                                                                                                                            | 8.72; s                                                                                                                        | -0.02; 0.00                                     |
| 18       | 8.26; s                                                                                                                           | 8.28; s                                                                                                                            | 8.28; s                                                                                                                        | -0.02; 0.00                                     |
| 20       | 1.49; s                                                                                                                           | 1.50; s                                                                                                                            | 1.50; s                                                                                                                        | -0.01; 0.00                                     |
| 21       | 3.38; t; 6.0                                                                                                                      | 3.40; buried in the<br>peak of water                                                                                               | 3.40; t; 5.9                                                                                                                   | -0.02; 0.00                                     |
| 22       | 3.86; m                                                                                                                           | 3.88; t; 5.9                                                                                                                       | 3.88; t; 5.9                                                                                                                   | -0.02; 0.00                                     |
| NH       | 9.23; br s                                                                                                                        | 8.90; br s                                                                                                                         | 9.24; br s                                                                                                                     | -0.01; -0.34                                    |

**Table S9.** Comparison of  $^{13}\text{C}$  NMR spectroscopic data of natural <sup>[6]</sup> and synthetic <sup>[7]</sup> (+)-adociaquinone B with this synthetic work.

| <b>position</b> | <b>natural (a)</b><br><b>(Ireland's work)</b><br>$\delta^{13}\text{C}$ [ppm], 125<br>MHz, DMSO- <i>d</i> <sub>6</sub> | <b>synthetic (b)</b><br><b>(Harada's work)</b><br>$\delta^{13}\text{C}$ [ppm], 125<br>MHz, DMSO- <i>d</i> <sub>6</sub> | <b>synthetic (c)</b><br><b>(this work)</b><br>$\delta^{13}\text{C}$ [ppm], 125<br>MHz, DMSO- <i>d</i> <sub>6</sub> | <b>deviation</b><br><b>(a-c; b-c)</b><br>$\Delta\delta$ (ppm) |
|-----------------|-----------------------------------------------------------------------------------------------------------------------|------------------------------------------------------------------------------------------------------------------------|--------------------------------------------------------------------------------------------------------------------|---------------------------------------------------------------|
| 1               | 146.2                                                                                                                 | 146.1                                                                                                                  | 146.2                                                                                                              | 0.0; -0.1                                                     |
| 2               | 121.6                                                                                                                 | 121.6                                                                                                                  | 121.6                                                                                                              | 0.0; 0.0                                                      |
| 3               | 16.2                                                                                                                  | 16.2                                                                                                                   | 16.2                                                                                                               | 0.0; 0.0                                                      |
| 4               | 17.8                                                                                                                  | 17.8                                                                                                                   | 17.8                                                                                                               | 0.0; 0.0                                                      |
| 5               | 30.3                                                                                                                  | 30.3                                                                                                                   | 30.3                                                                                                               | 0.0; 0.0                                                      |
| 6               | 36.8                                                                                                                  | 36.8                                                                                                                   | 36.8                                                                                                               | 0.0; 0.0                                                      |
| 7               | 147.9                                                                                                                 | 147.9                                                                                                                  | 147.9                                                                                                              | 0.0; 0.0                                                      |
| 8               | 143.1                                                                                                                 | 143.1                                                                                                                  | 143.0                                                                                                              | 0.1; 0.1                                                      |
| 9               | 169.4                                                                                                                 | 169.4                                                                                                                  | 169.4                                                                                                              | 0.0; 0.0                                                      |
| 10              | 137.9                                                                                                                 | 137.9                                                                                                                  | 137.9                                                                                                              | 0.0; 0.0                                                      |
| 11              | 124.7                                                                                                                 | 124.8                                                                                                                  | 124.7                                                                                                              | 0.0; 0.1                                                      |
| 12              | 130.9                                                                                                                 | 130.9                                                                                                                  | 130.8                                                                                                              | 0.1; 0.1                                                      |
| 13              | 173.7                                                                                                                 | 173.7                                                                                                                  | 173.7                                                                                                              | 0.0; 0.0                                                      |
| 14              | 147.1                                                                                                                 | 147.1                                                                                                                  | 147.1                                                                                                              | 0.0; 0.0                                                      |
| 15              | 111.3                                                                                                                 | 111.4                                                                                                                  | 111.3                                                                                                              | 0.0; 0.1                                                      |
| 16              | 178.3                                                                                                                 | 178.3                                                                                                                  | 178.3                                                                                                              | 0.0; 0.0                                                      |
| 17              | 131.8                                                                                                                 | 131.8                                                                                                                  | 131.8                                                                                                              | 0.0; 0.0                                                      |
| 18              | 123.4                                                                                                                 | 123.4                                                                                                                  | 123.4                                                                                                              | 0.0; 0.0                                                      |
| 19              | 154.6                                                                                                                 | 154.6                                                                                                                  | 154.6                                                                                                              | 0.0; 0.0                                                      |
| 20              | 31.6                                                                                                                  | 31.6                                                                                                                   | 31.6                                                                                                               | 0.0; 0.0                                                      |
| 21              | 48.2                                                                                                                  | 48.3                                                                                                                   | 48.2                                                                                                               | 0.0; 0.1                                                      |
| 22              | 39.3                                                                                                                  | around 40, buried in<br>the peak of DMSO- <i>d</i> <sub>6</sub>                                                        | 39.3, buried in the<br>peak of DMSO- <i>d</i> <sub>6</sub>                                                         | 0.0; 0.7                                                      |

## References

- [1]. W. C. Still, M. Kahn and A. Mitra, *J. Org. Chem.*, 1978, **43**, 2923-2925.
- [2]. A. B. Smith, R. J. Fox and J. A. Vanecko, *Org. Lett.*, 2005, **7**, 3099-3102.
- [3]. H. Nakamura, J. i. Kobayashi, M. Kobayashi, Y. Ohizumi and Y. Hirata, *Chem. Lett.*, 1985, 713-716.
- [4]. D. Laurent, V. Jullian, A. Parenty, M. Knibiehler, D. Dorin, S. Schmitt, O. Lozach, N. Lebouvier, M. Frostin, F. Alby, S. Maurel, C. Doerig, L. Meijer and M. Sauvain, *Bioorg. Med. Chem.*, 2006, **14**, 4477-4482.
- [5]. N. Harada, T. Sugioka, H. Uda and T. Kuriki, *J. Org. Chem.*, 1990, **55**, 3158-3163.
- [6]. G. P. Concepcion, T. A. Foderaro, G. S. Eldredge, E. Lobkovsky, J. Clardy, L. R. Barrows and C. M. Ireland, *J. Med. Chem.*, 1995, **38**, 4503-4507.
- [7]. N. Harada, T. Sugioka, T. Soutome, N. Hiyoshi, H. Uda and T. Kuriki, *Tetrahedron: Asymmetry*, 1995, **6**, 375-376.

# <sup>1</sup>H and <sup>13</sup>C NMR, HPLC spectra of the synthetic intermediates and products

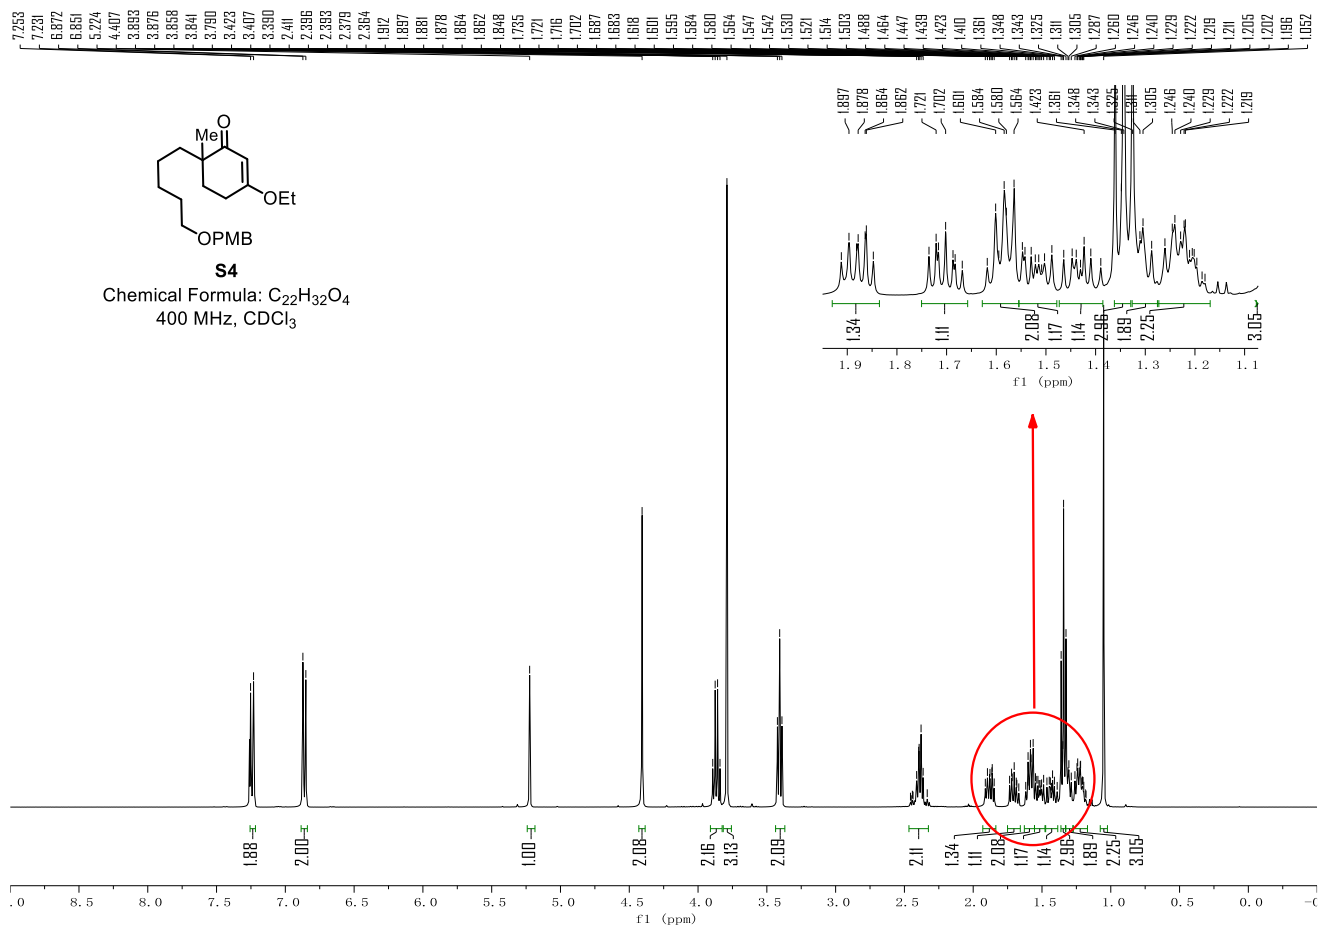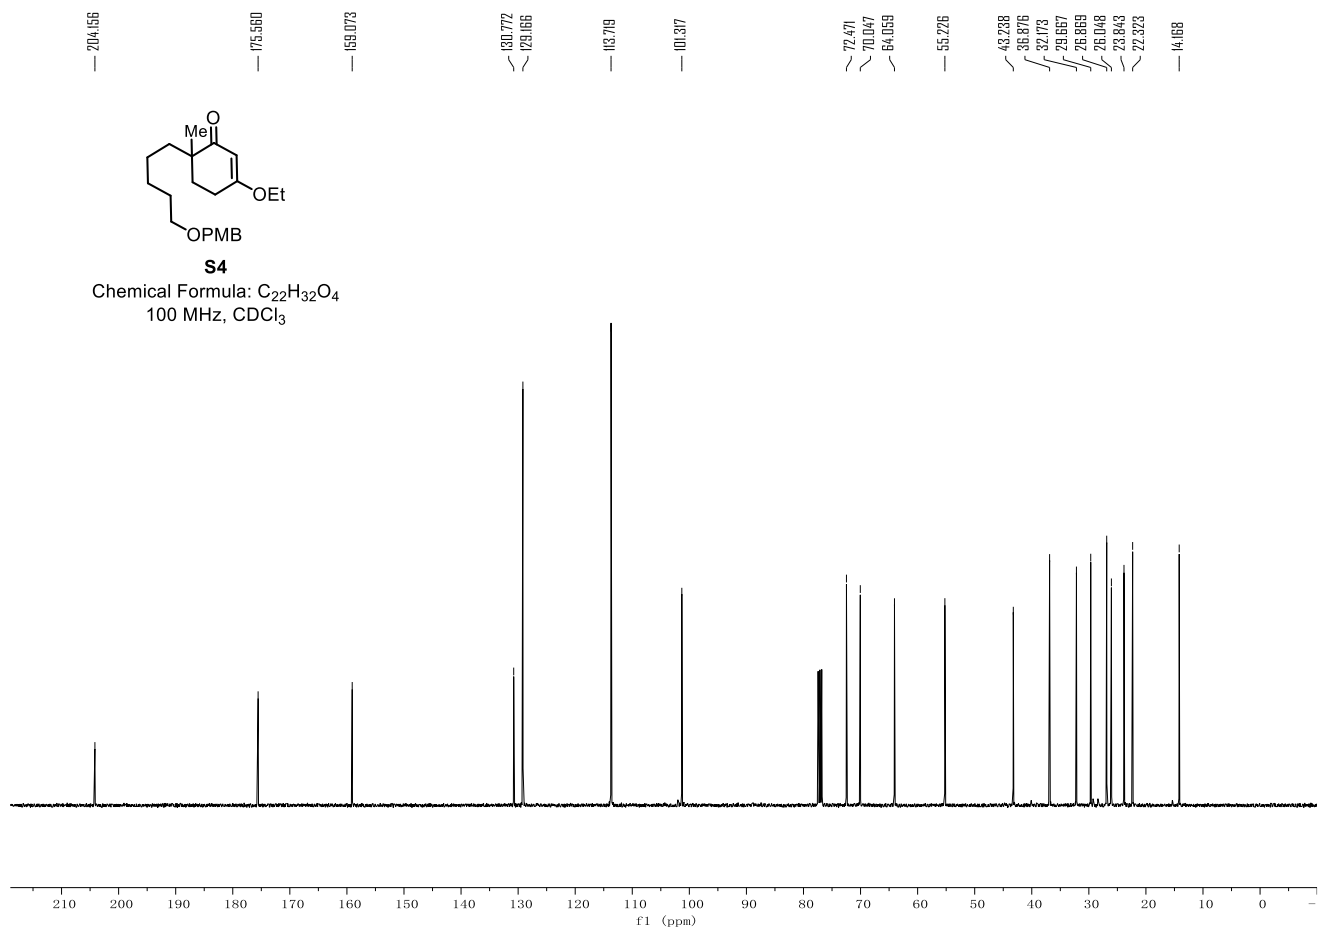

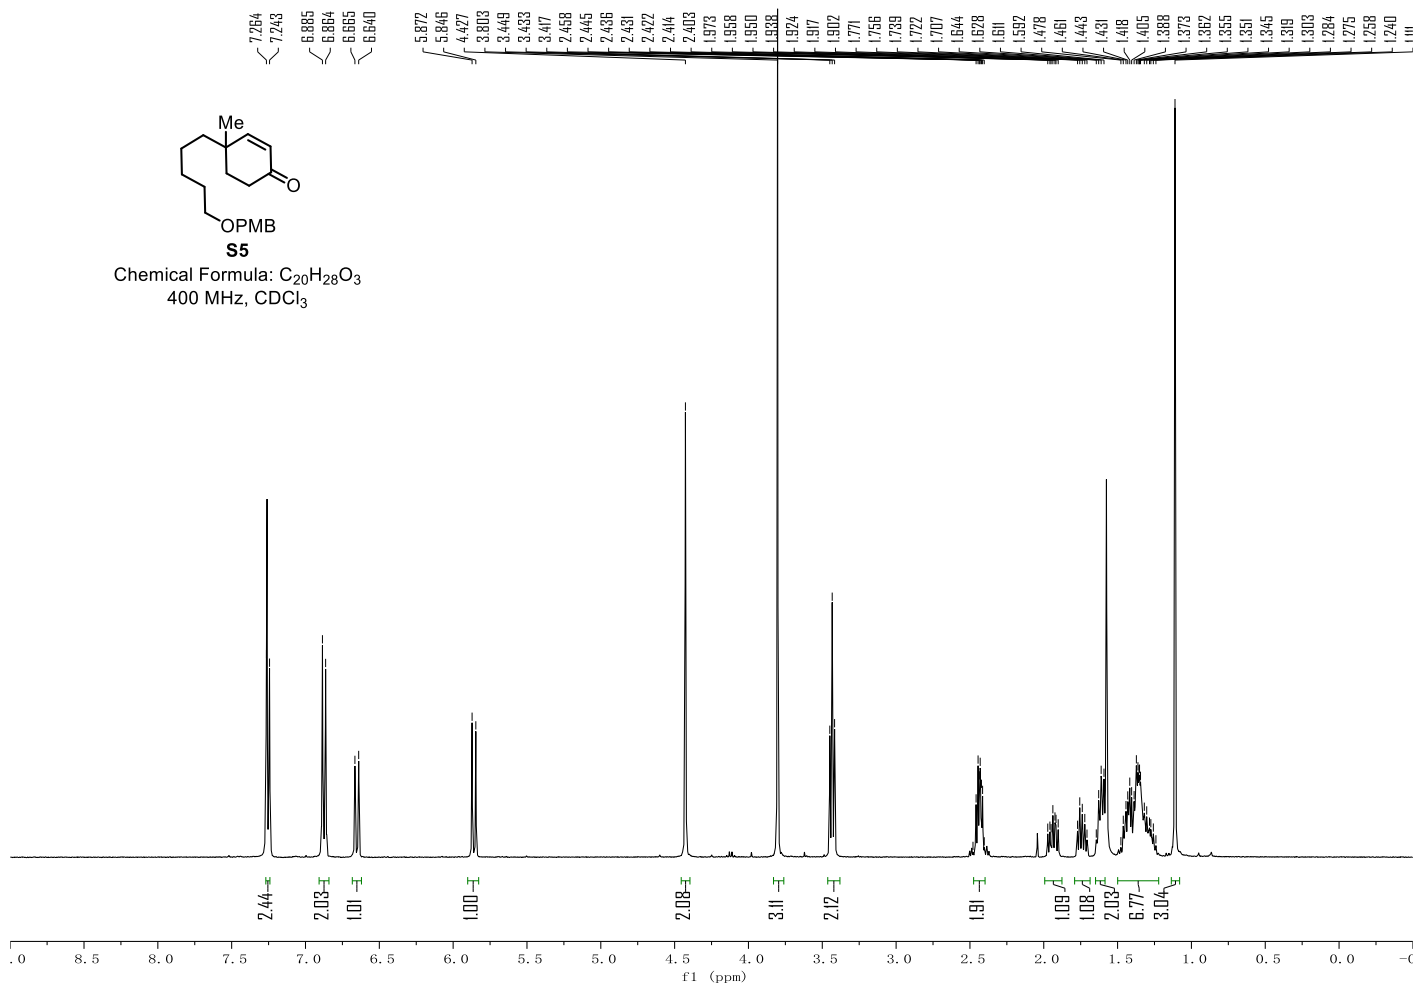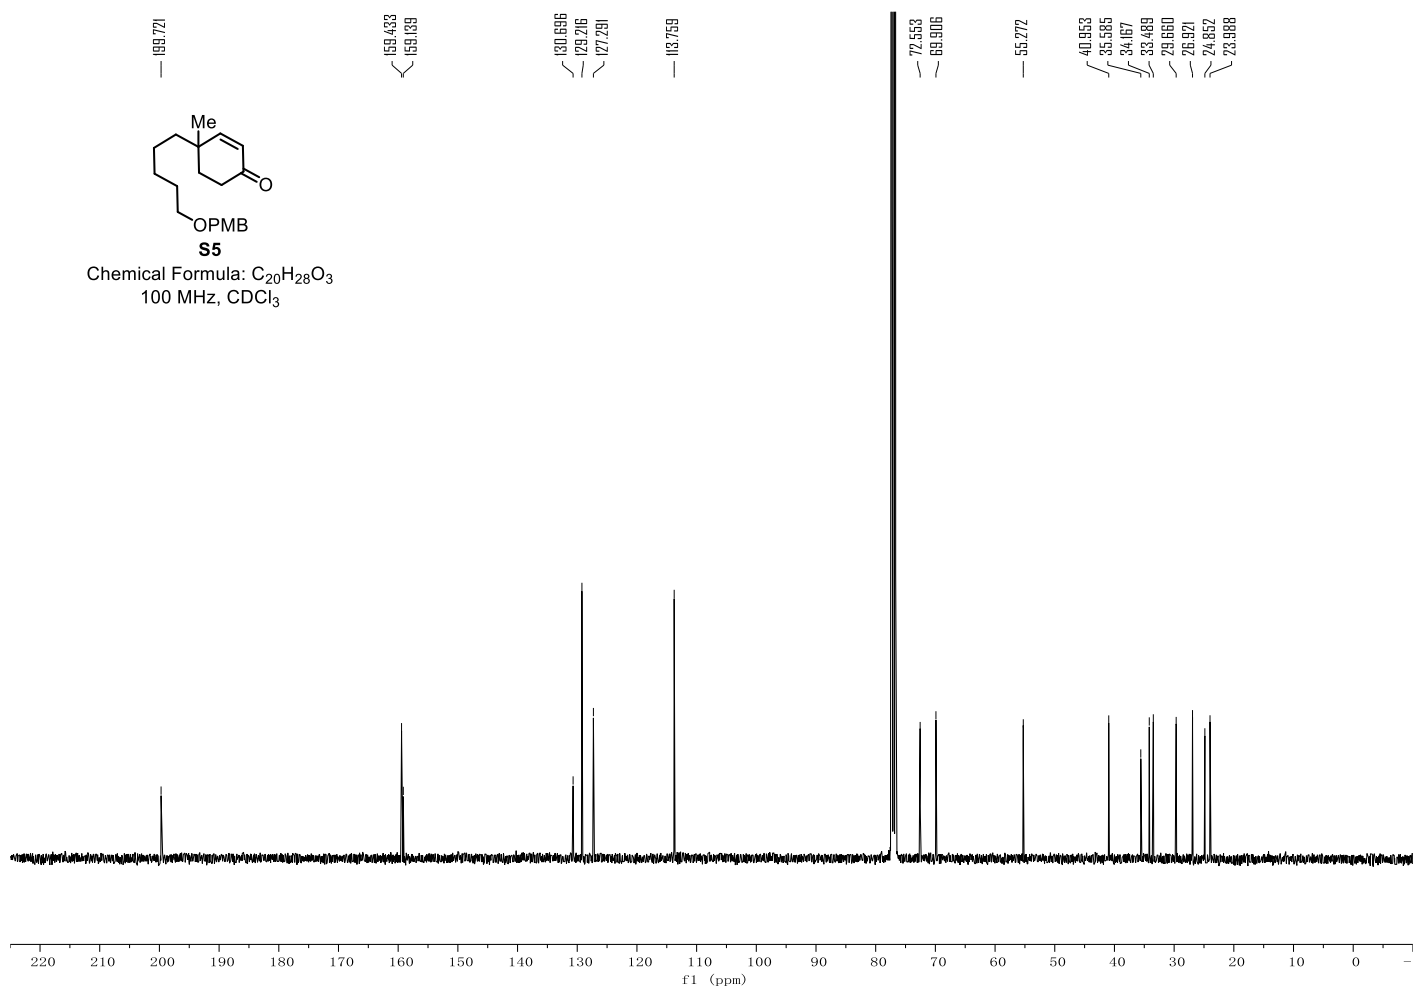



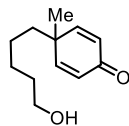

**S6**  
 Chemical Formula: C<sub>12</sub>H<sub>18</sub>O<sub>2</sub>  
 500 MHz, CDCl<sub>3</sub>

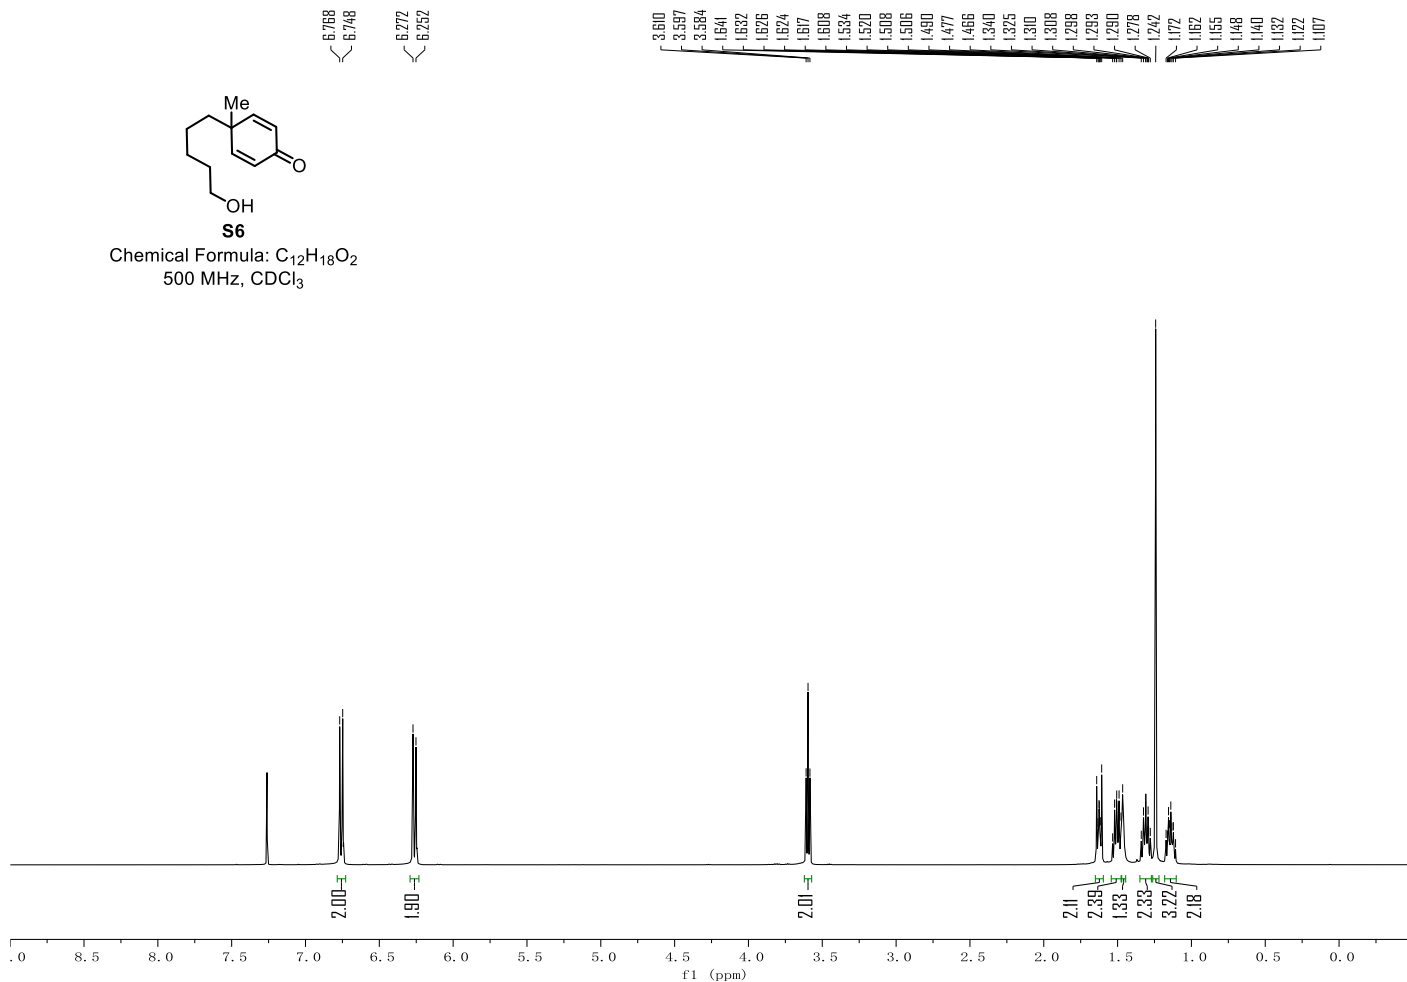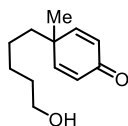

**S6**  
 Chemical Formula: C<sub>12</sub>H<sub>18</sub>O<sub>2</sub>  
 125 MHz, CDCl<sub>3</sub>

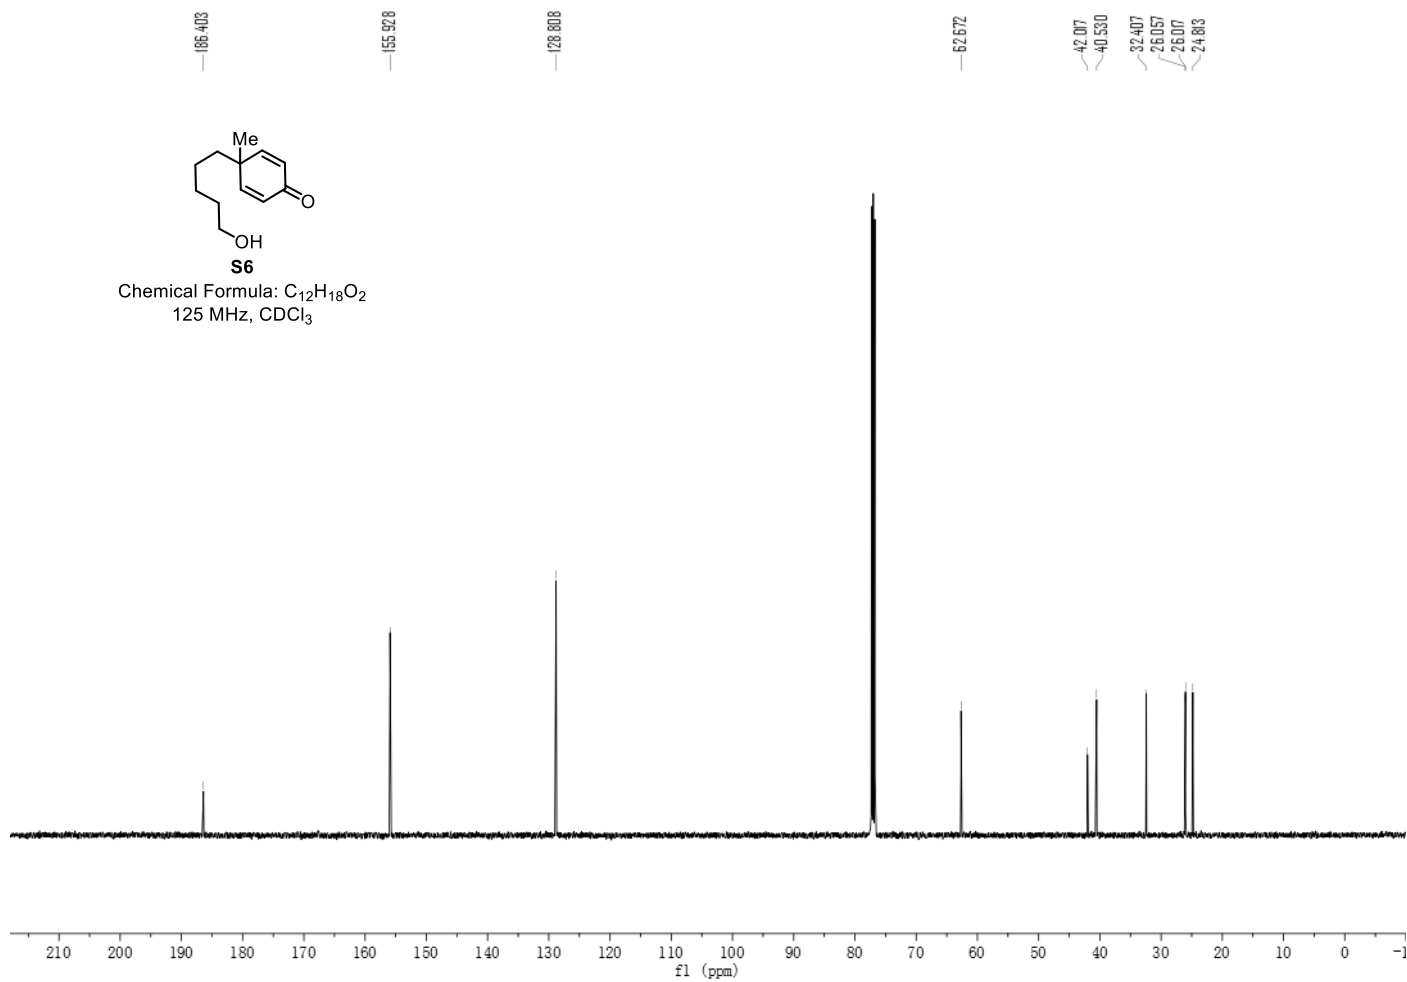

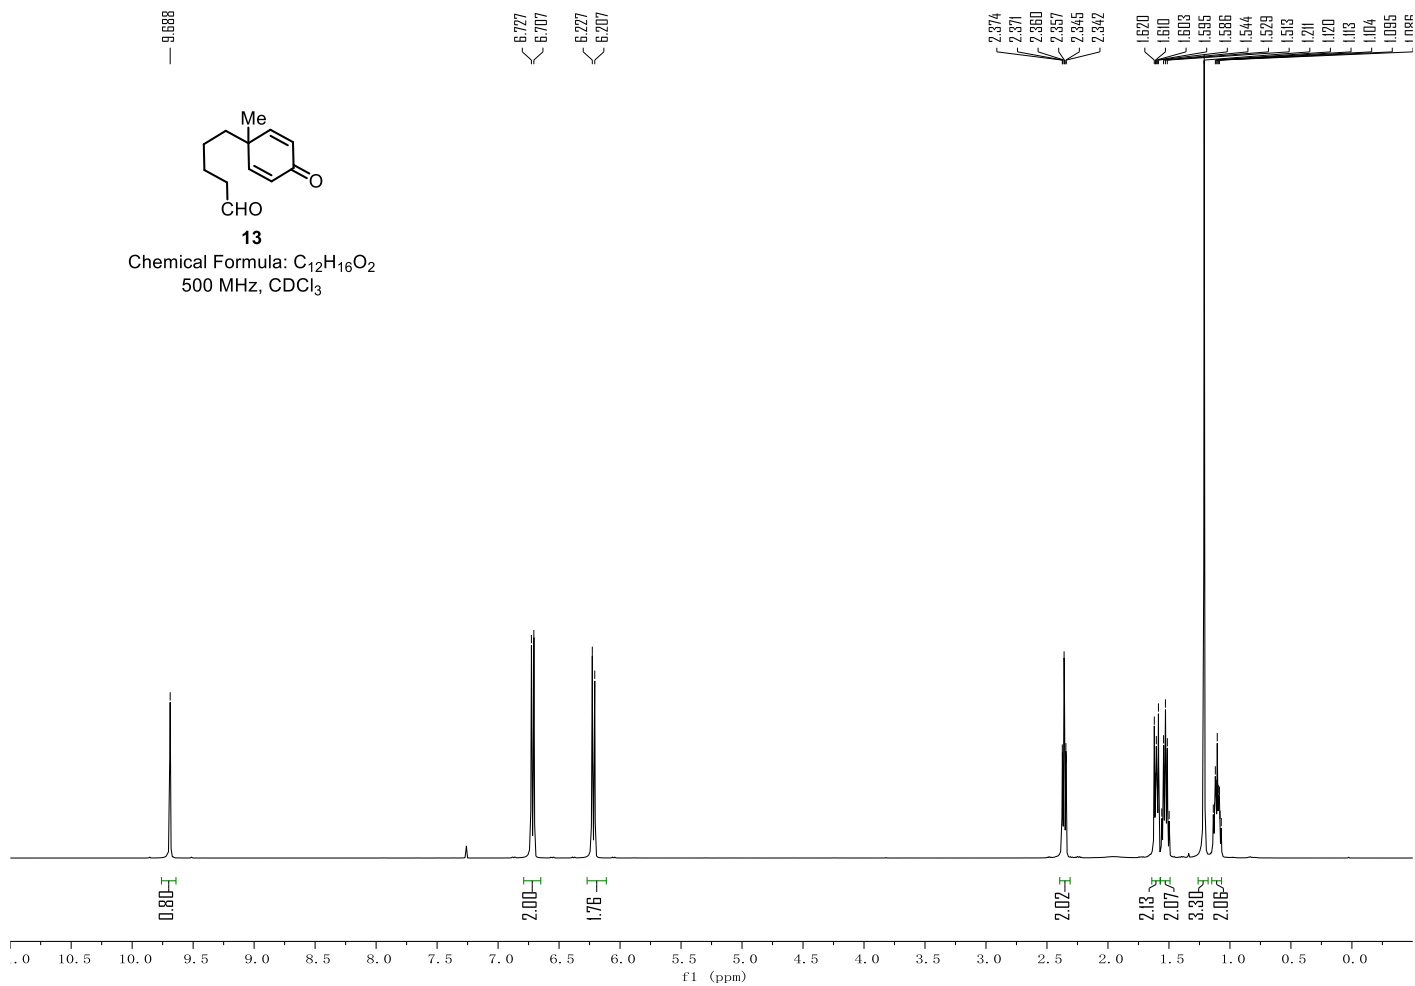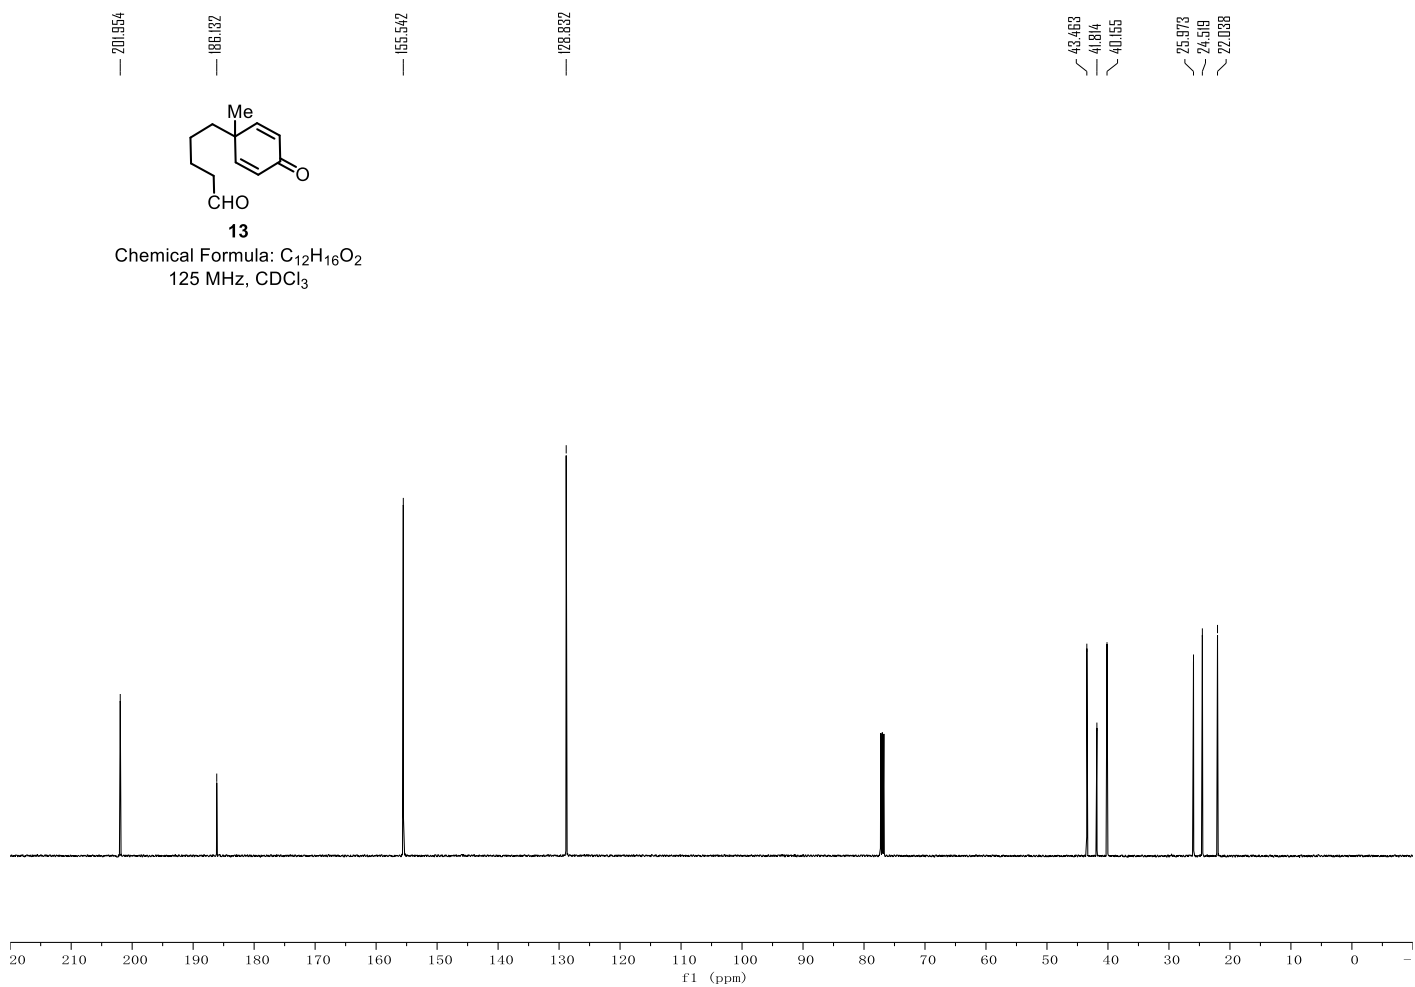

6.633  
6.618  
5.850  
5.830  
4.250  
4.235  
4.096  
4.093  
4.086  
4.083  
4.076  
4.073  
4.066  
4.063  
4.057  
4.054  
4.044  
3.732  
3.718  
3.708  
3.706  
3.700  
3.689  
3.683  
3.681  
3.675  
3.657  
2.409  
2.404  
2.378  
2.373  
2.285  
2.276  
2.249  
2.246  
2.053  
2.051  
1.925  
1.988  
1.981  
1.969  
1.962  
1.733  
1.728  
1.708  
1.701  
1.637  
1.631  
1.501  
1.476  
1.470  
1.462  
1.453  
1.449  
1.443  
1.425  
1.418  
1.405  
1.402  
1.399  
1.396  
1.394  
1.340  
1.313  
1.156  
1.151  
1.140  
1.131

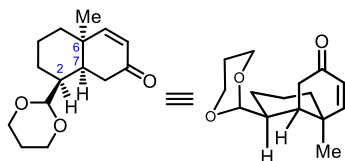

**12a (major)**  
Chemical Formula: C<sub>15</sub>H<sub>22</sub>O<sub>3</sub>  
500 MHz, CDCl<sub>3</sub>

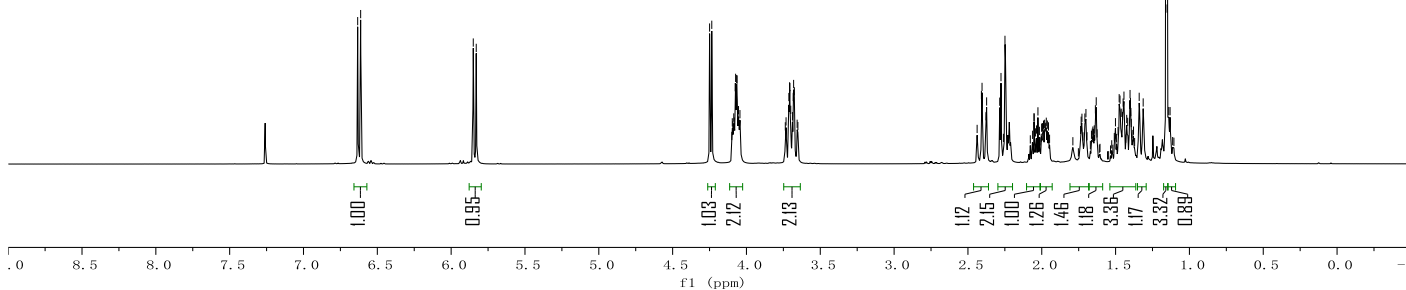

200.587  
161.466  
126.007  
103.092  
67.005  
66.988  
40.058  
38.374  
36.098  
34.697  
31.923  
25.869  
24.338  
21.836  
20.272

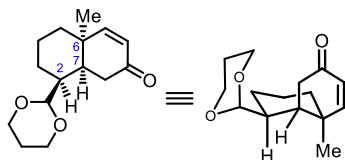

**12a (major)**  
Chemical Formula: C<sub>15</sub>H<sub>22</sub>O<sub>3</sub>  
125 MHz, CDCl<sub>3</sub>

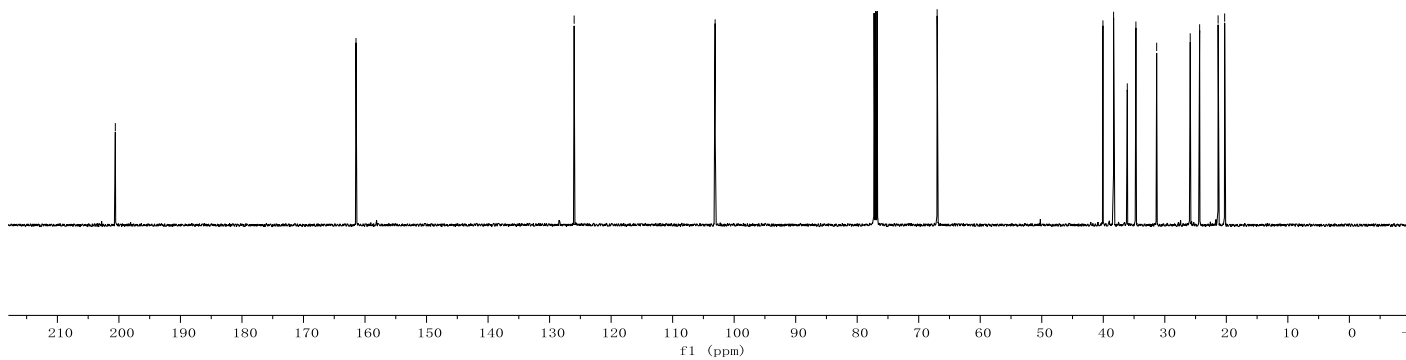

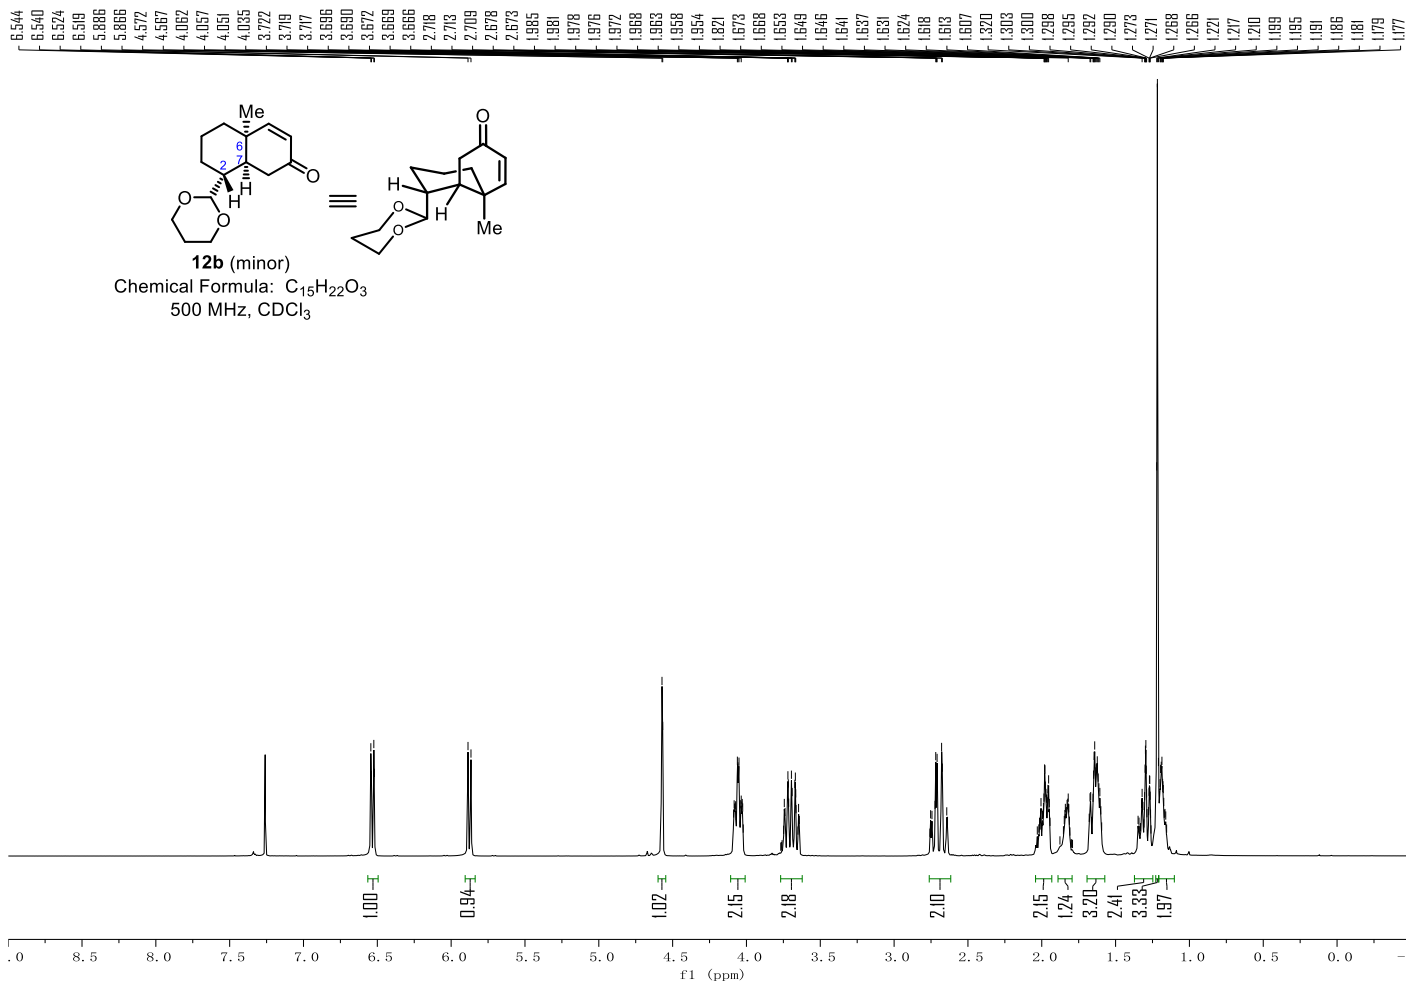

159.413

158.047

128.316

102.225

67.074

66.981

42.028

40.849

40.194

37.534

37.520

27.766

25.839

25.290

22.596

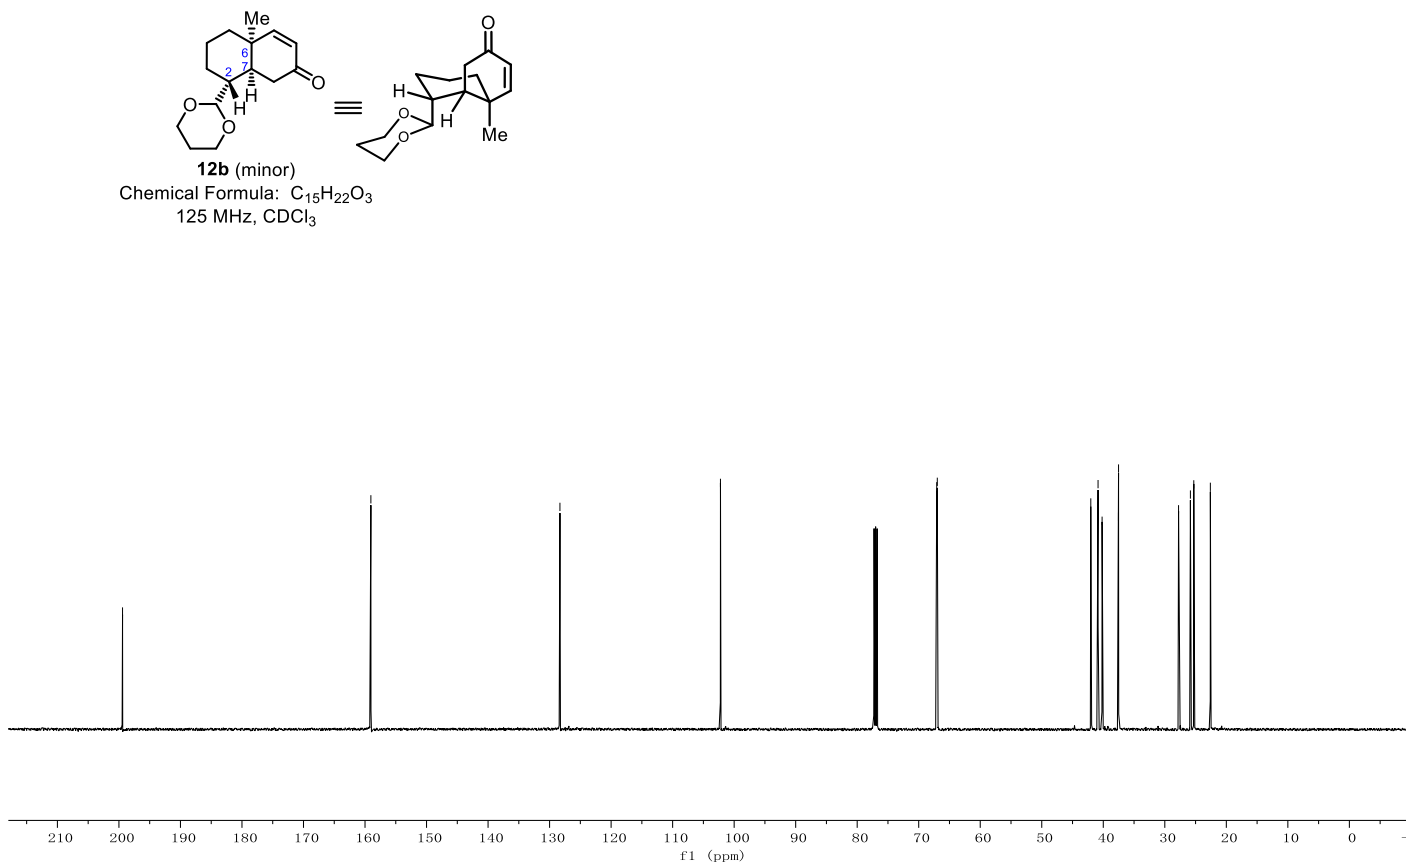

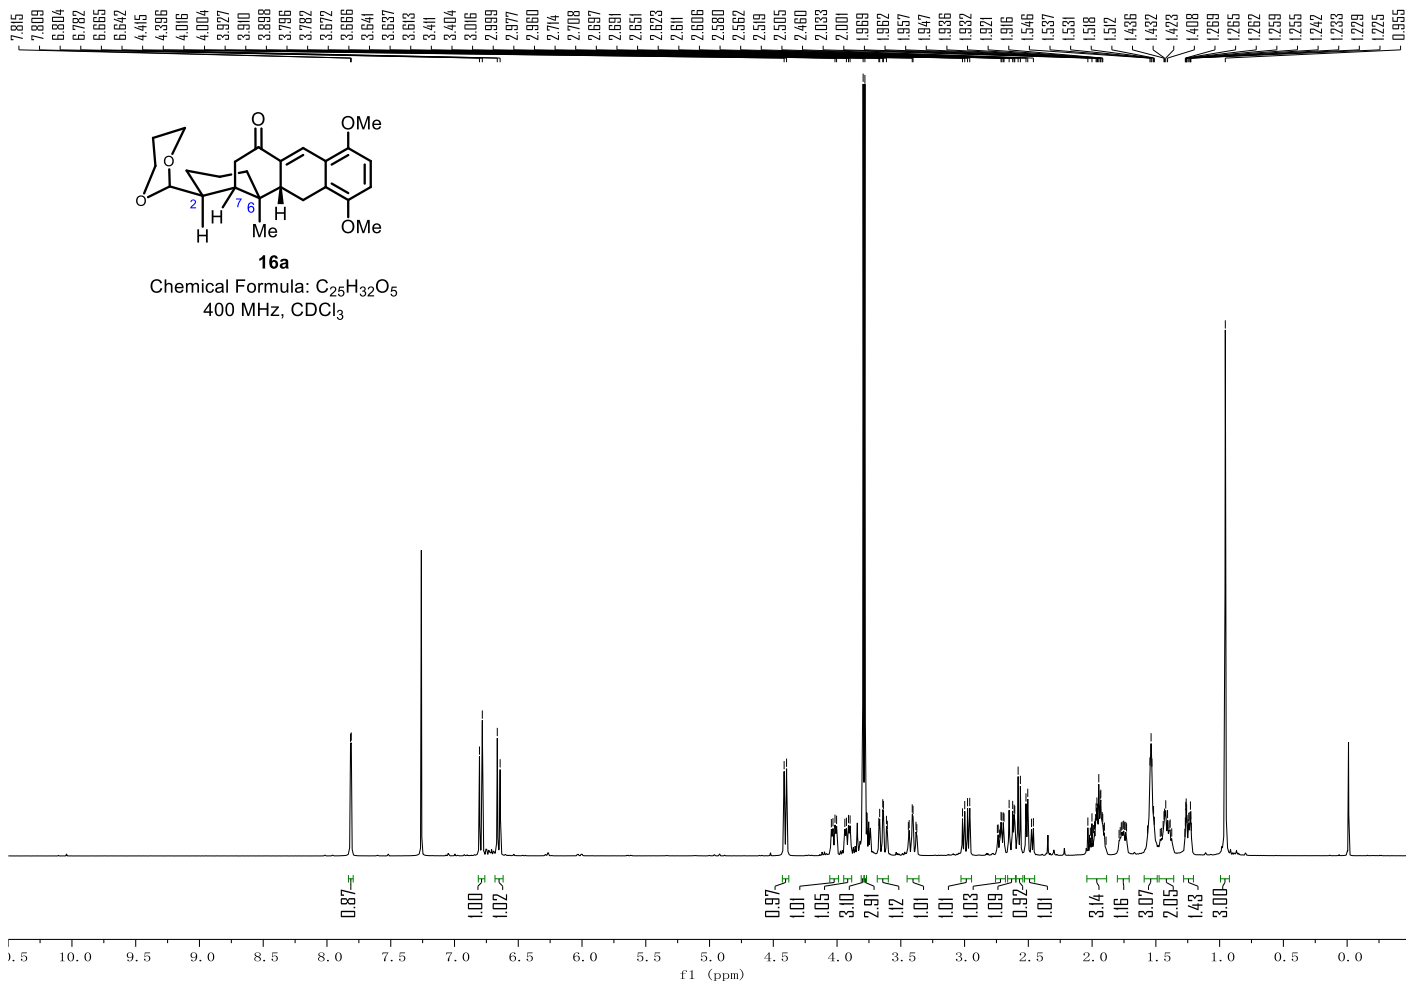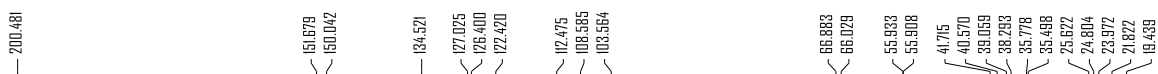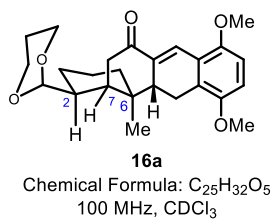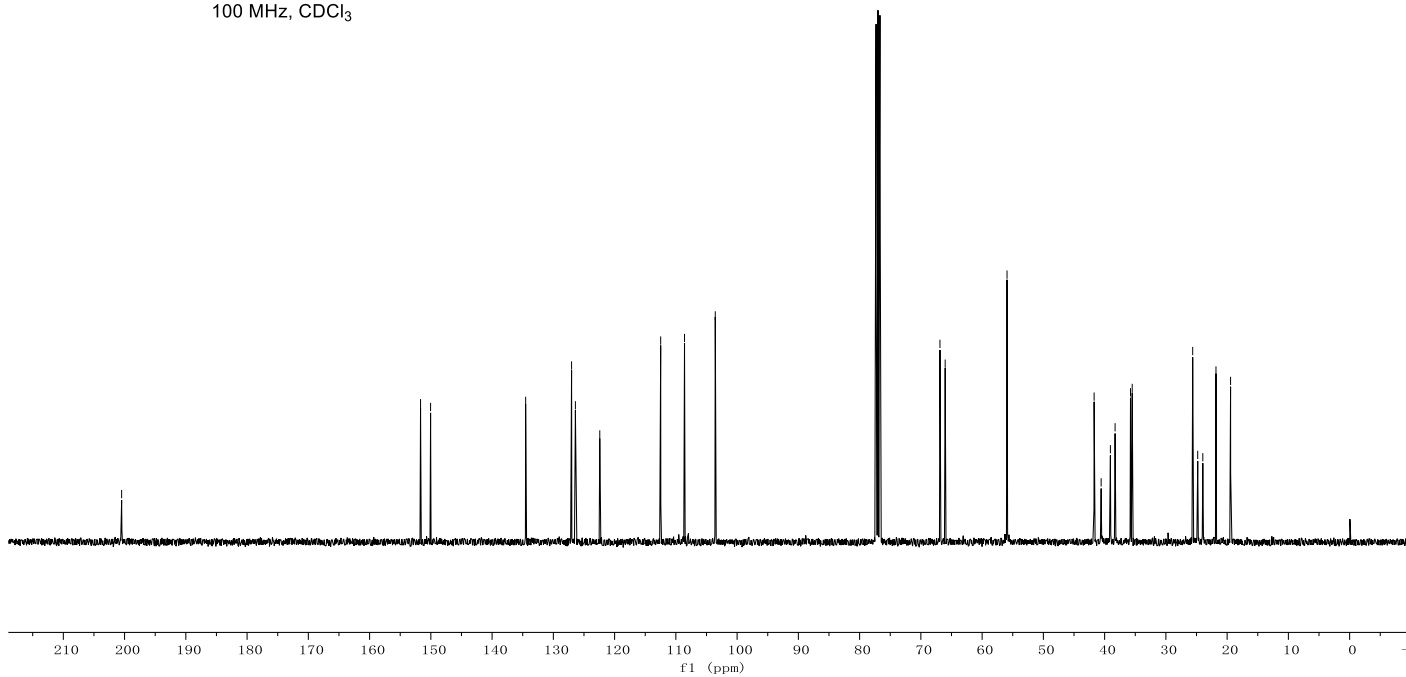

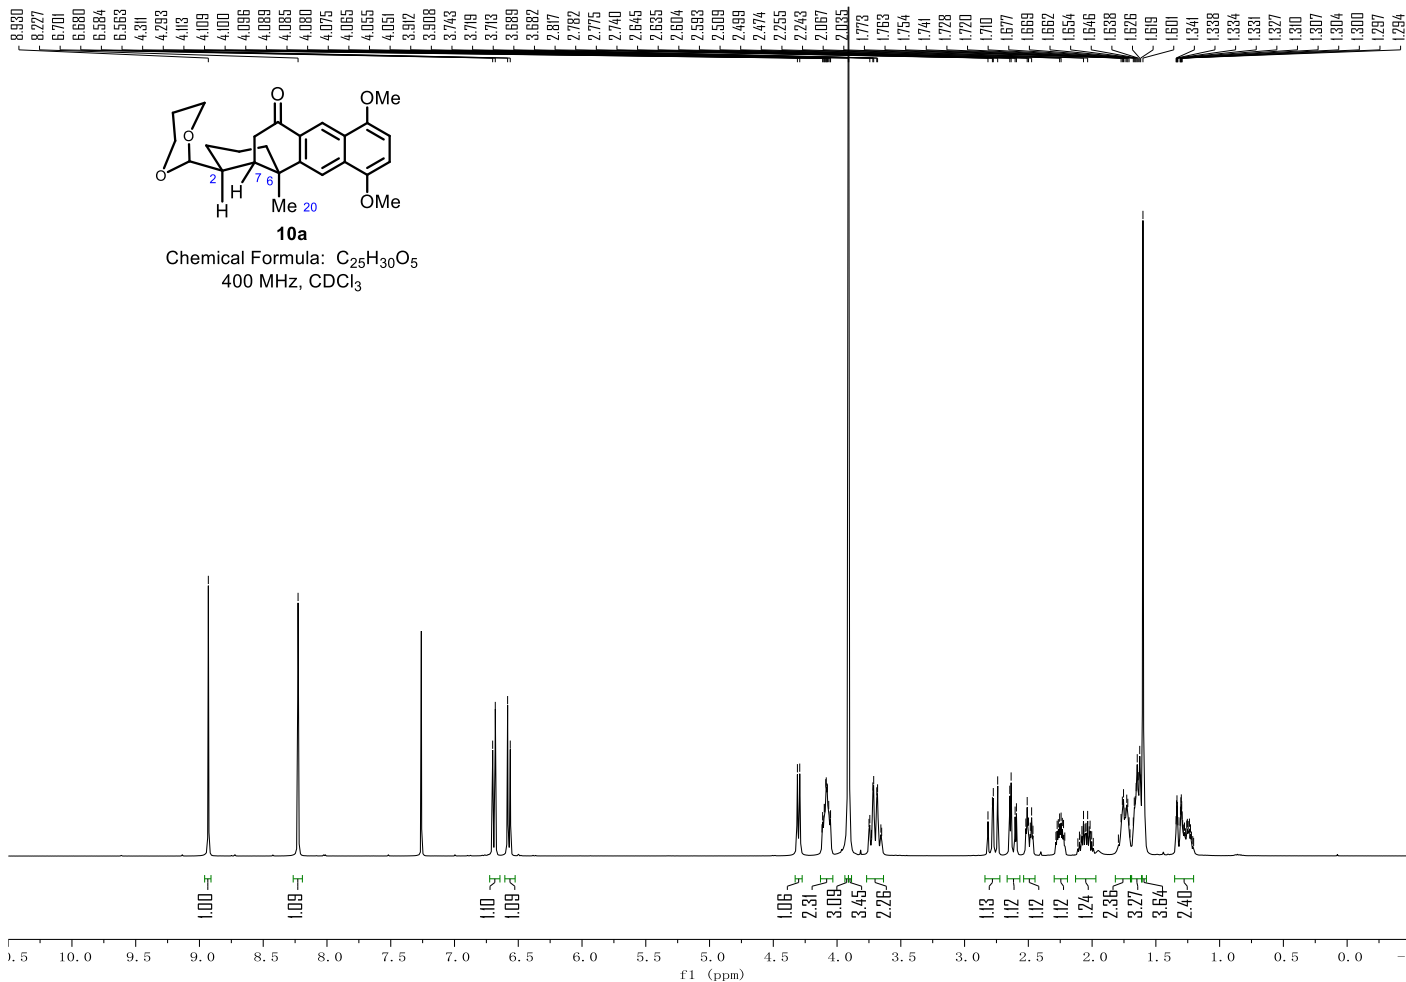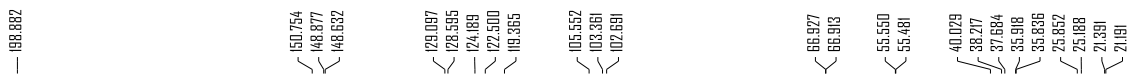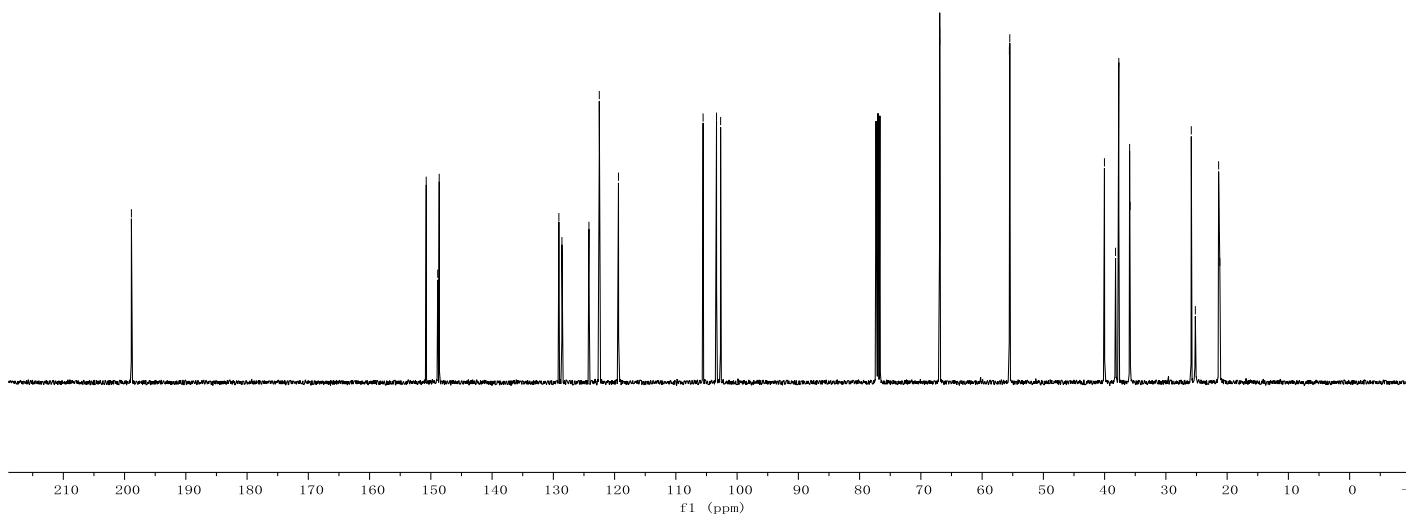

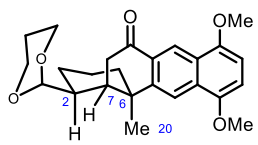

**10a**

Chemical Formula:  $C_{25}H_{30}O_5$   
DEPT135,  $CDCl_3$

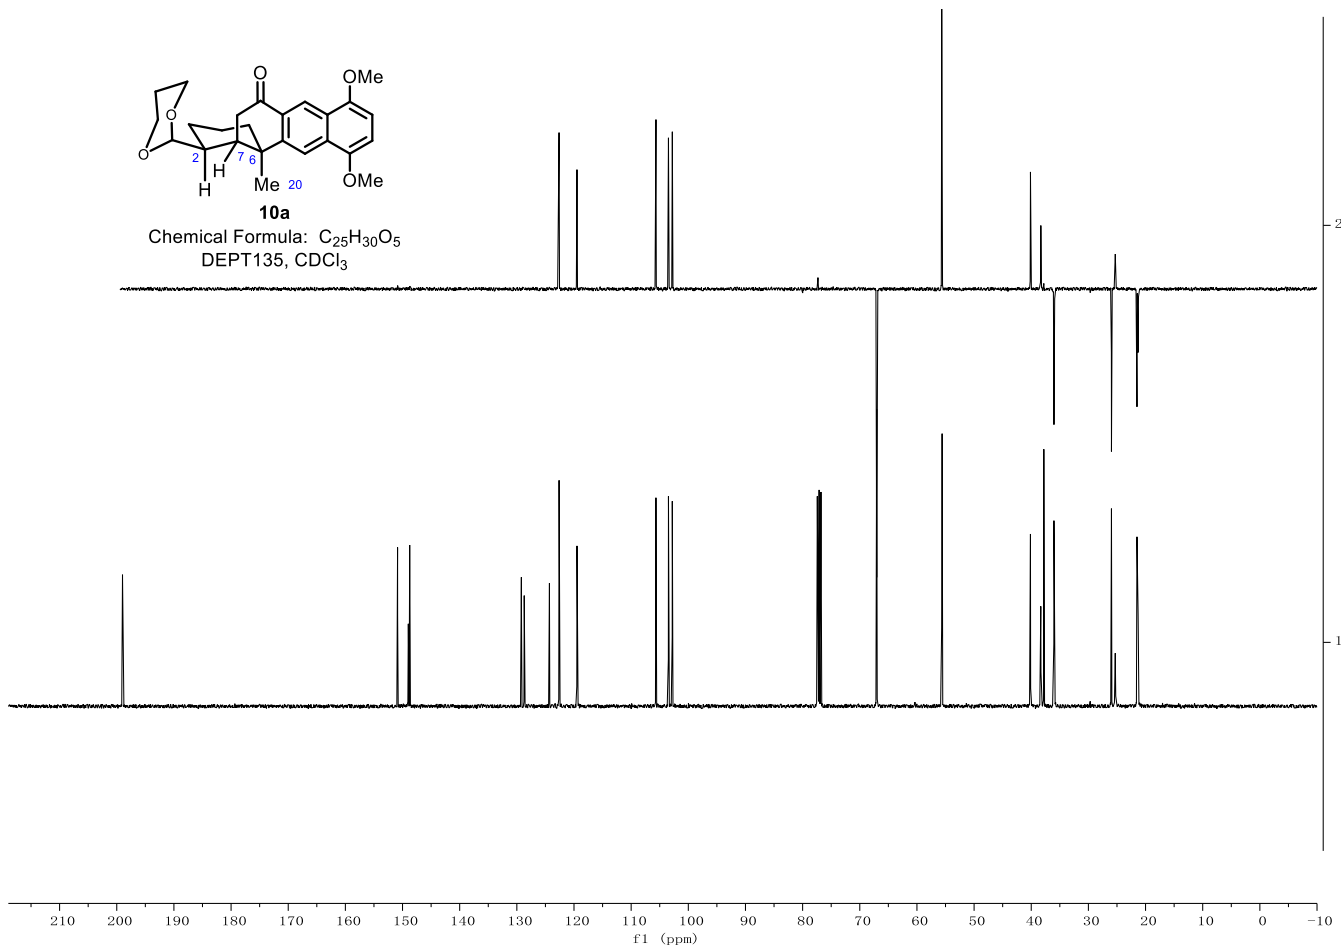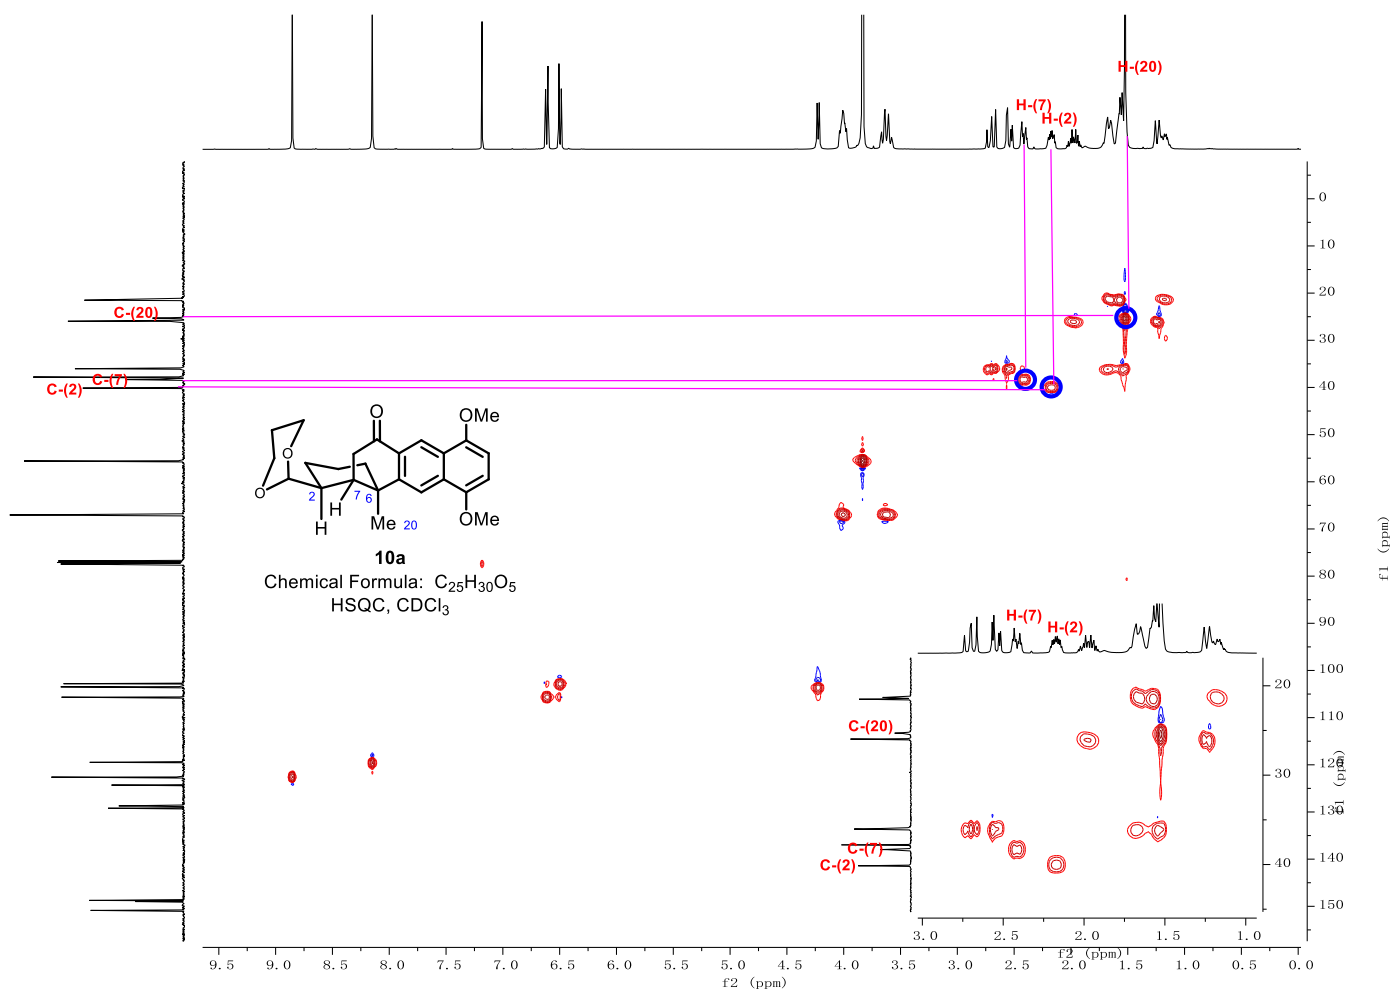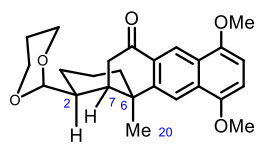

**10a**

Chemical Formula:  $C_{25}H_{30}O_5$   
HSQC,  $CDCl_3$

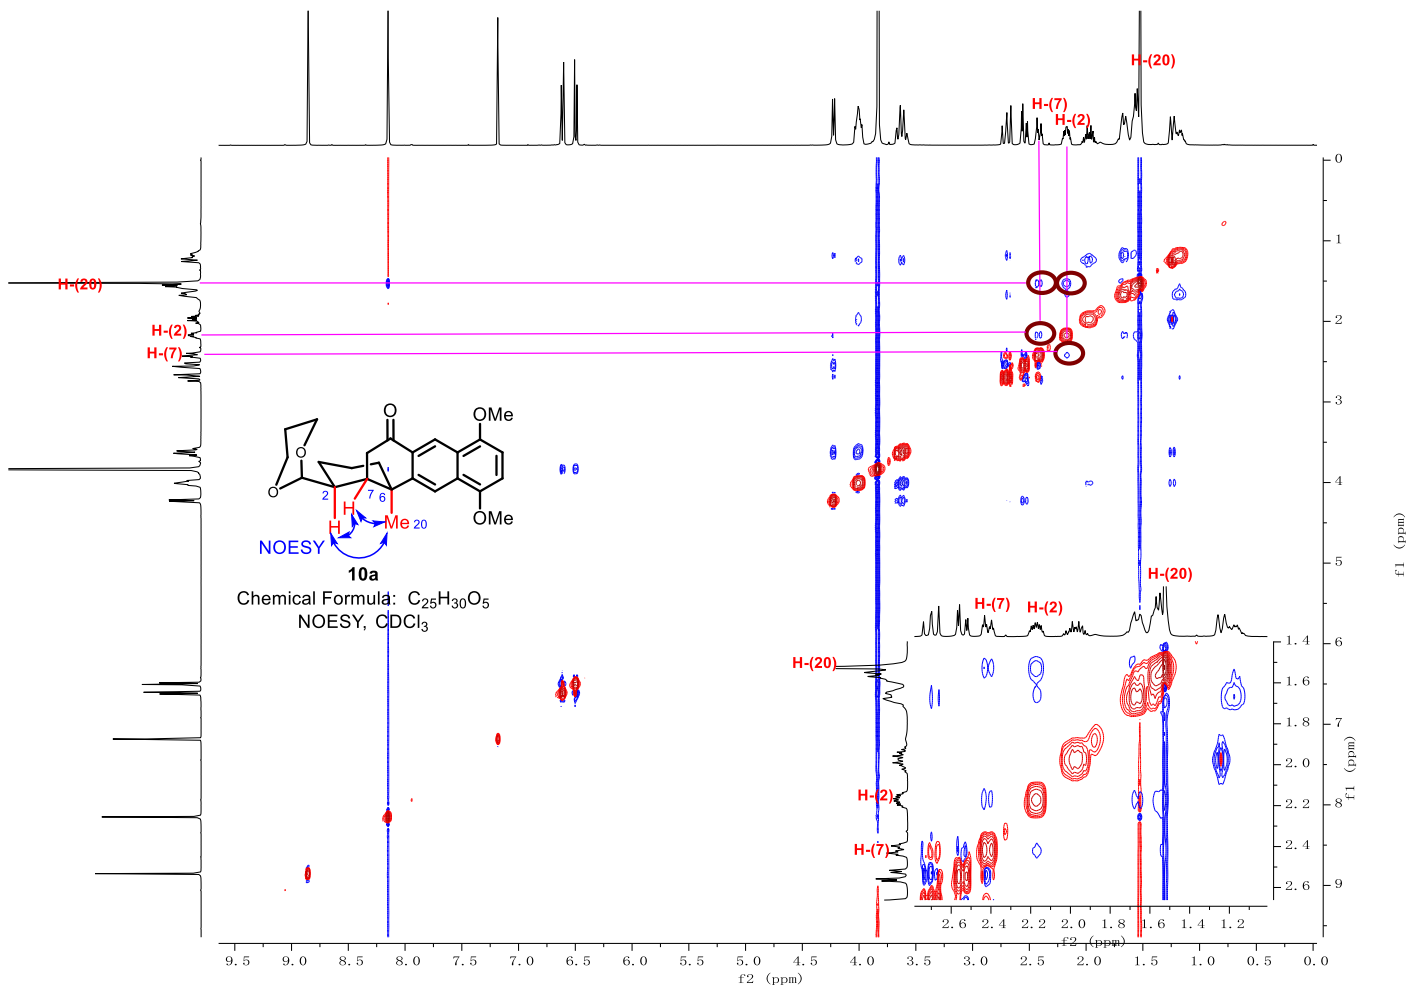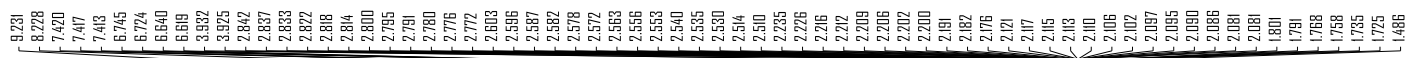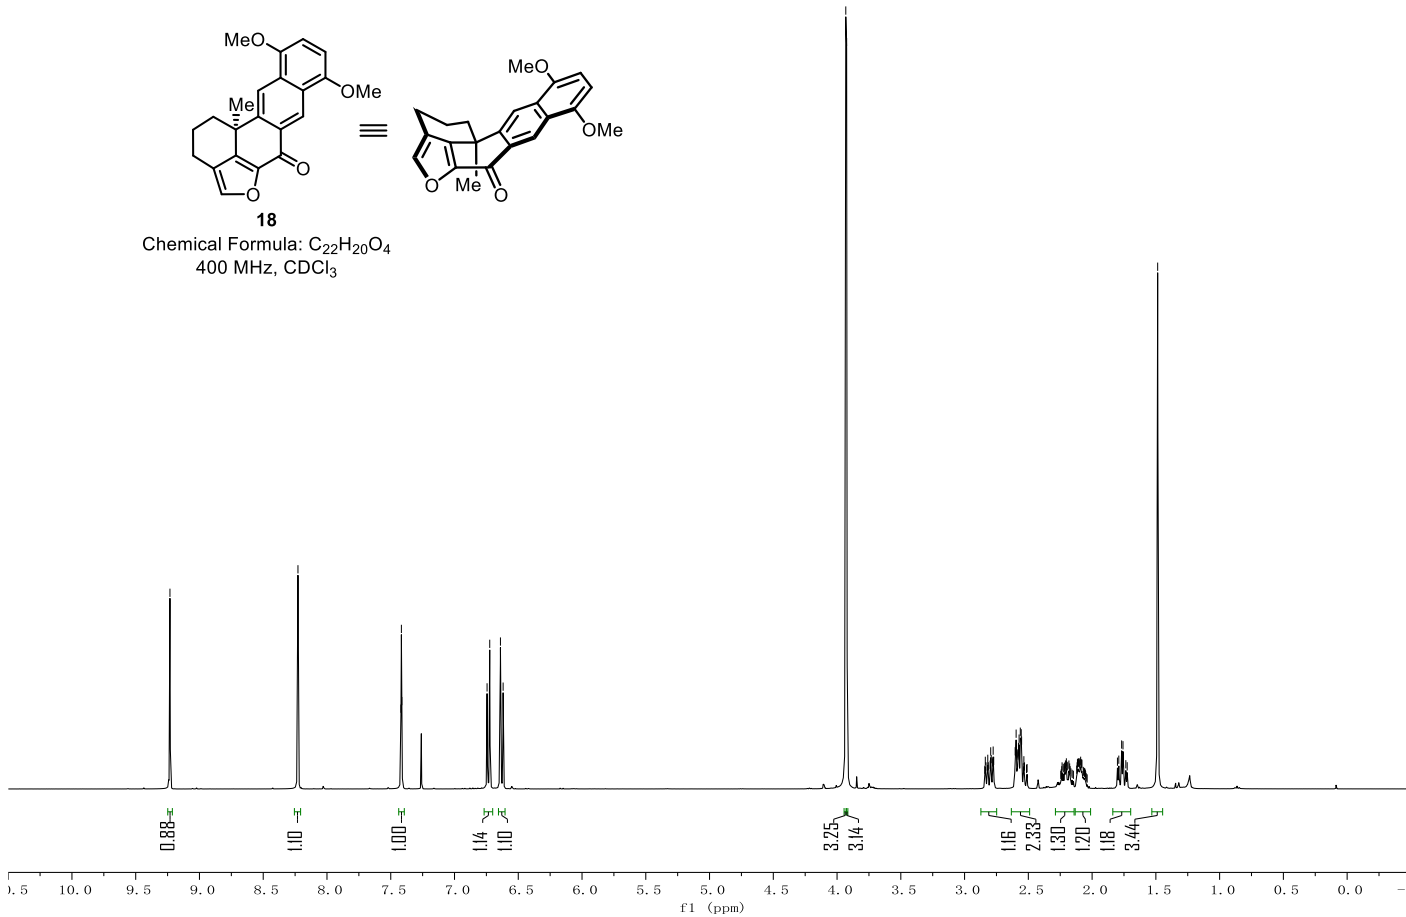



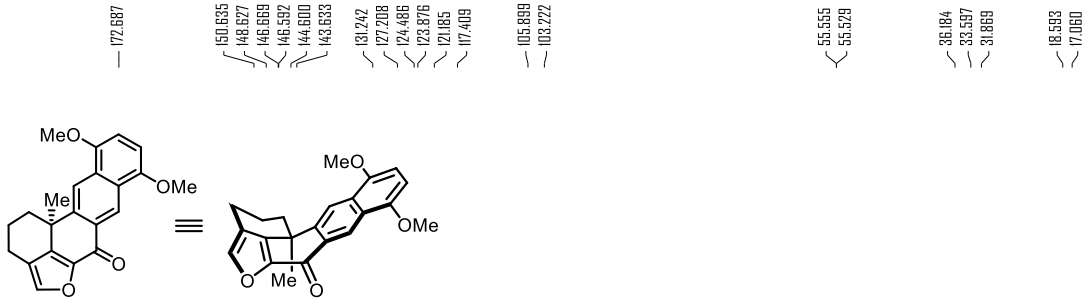

Chemical Formula:  $C_{22}H_{20}O_4$   
100 MHz,  $CDCl_3$

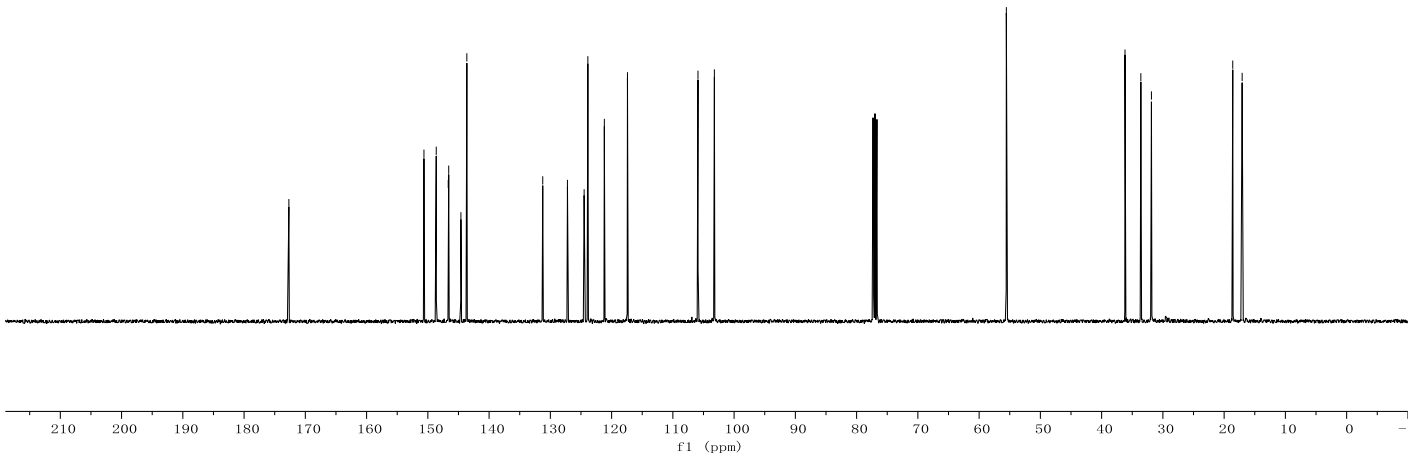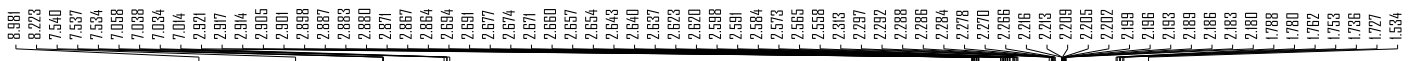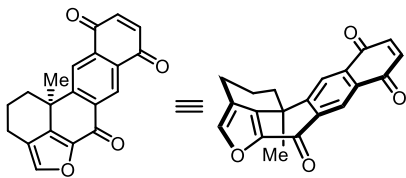

**(+)-xestoquinone (2)**  
Chemical Formula:  $C_{20}H_{14}O_4$   
500 MHz,  $CDCl_3$

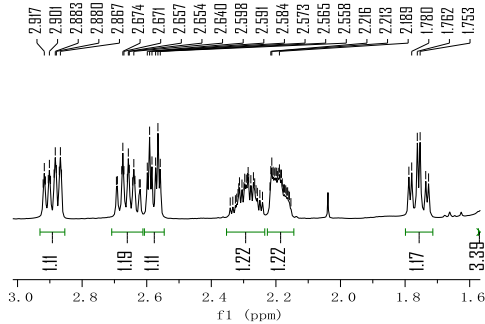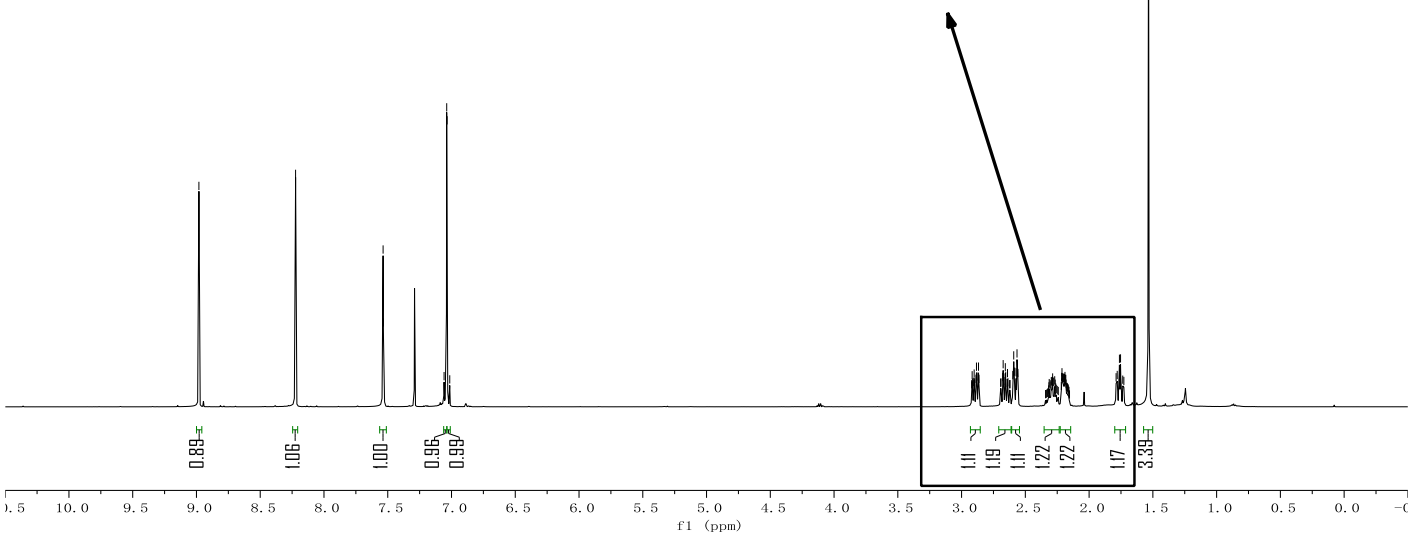

184.636  
183.790  
170.127  
156.215  
147.323  
144.999  
143.556  
139.319  
138.658  
137.889  
133.195  
130.281  
126.886  
123.683  
121.588

37.360  
32.592  
31.556  
18.431  
16.923

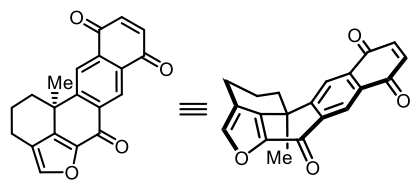

(+)-xestoquinone (2)  
Chemical Formula: C<sub>20</sub>H<sub>14</sub>O<sub>4</sub>  
125 MHz, CDCl<sub>3</sub>

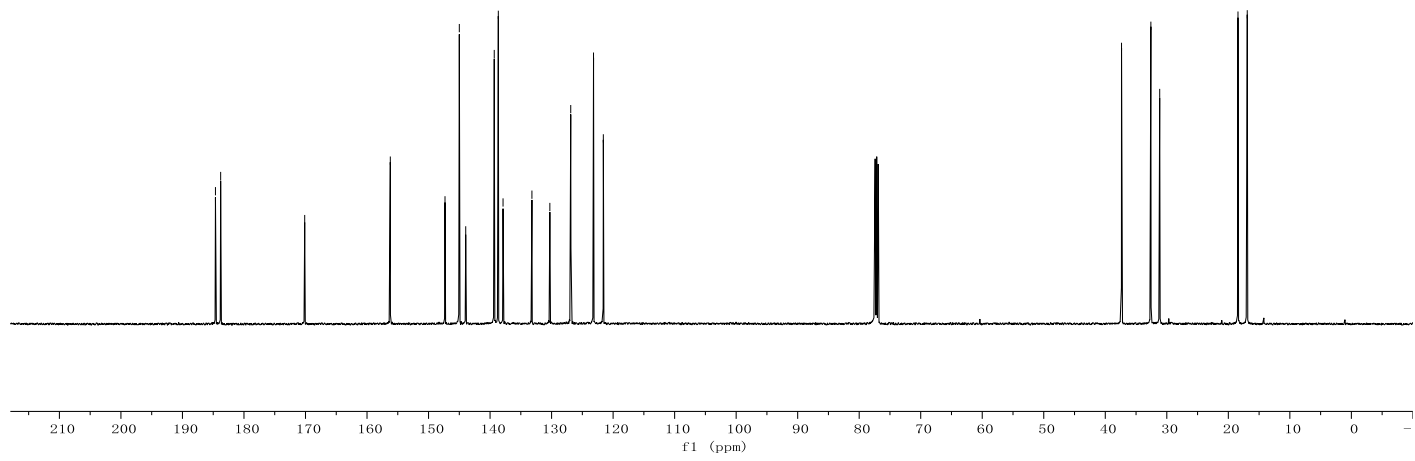

9.350  
8.680  
8.260  
7.998

3.888  
3.887  
3.874  
3.418  
3.406  
3.394  
2.866  
2.850  
2.832  
2.816  
2.626  
2.634  
2.618  
2.609  
2.600  
2.594  
2.576  
2.557  
2.281  
2.279  
2.263  
2.253  
2.245  
2.235  
2.226  
2.218  
2.208  
2.198  
2.189  
2.181  
2.098  
2.077  
2.054  
2.025  
1.676  
1.667  
1.651  
1.644  
1.624  
1.615  
1.495

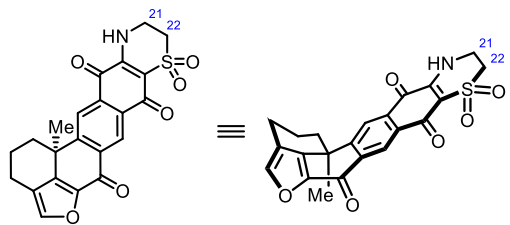

(+)-adociaquinone A (3)  
Chemical Formula: C<sub>22</sub>H<sub>17</sub>NO<sub>6</sub>S  
500 MHz, DMSO-*d*<sub>6</sub>

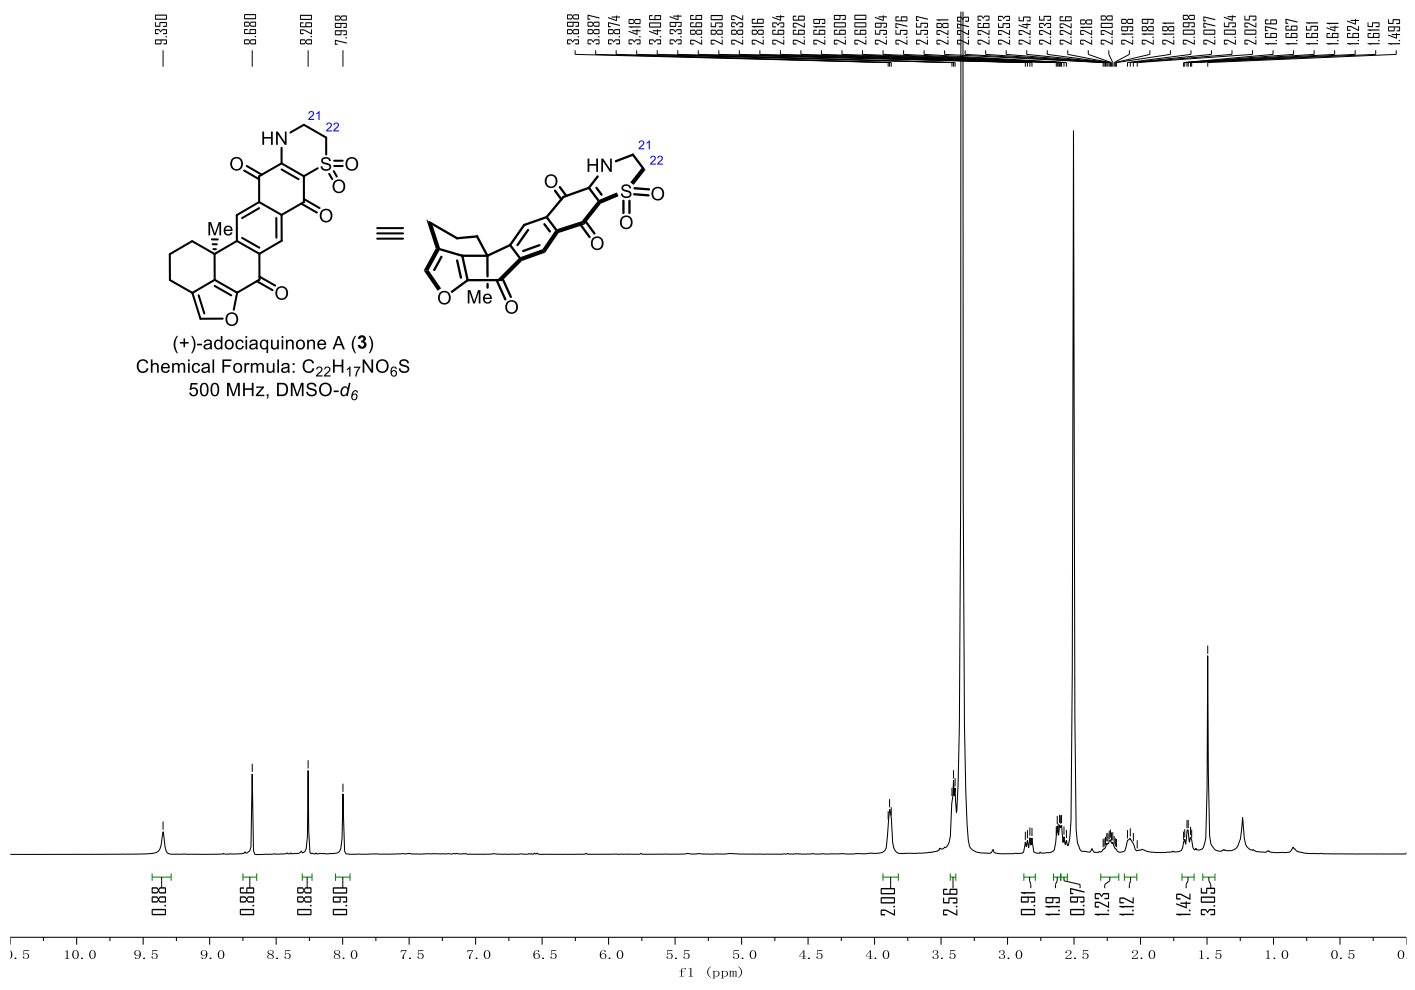

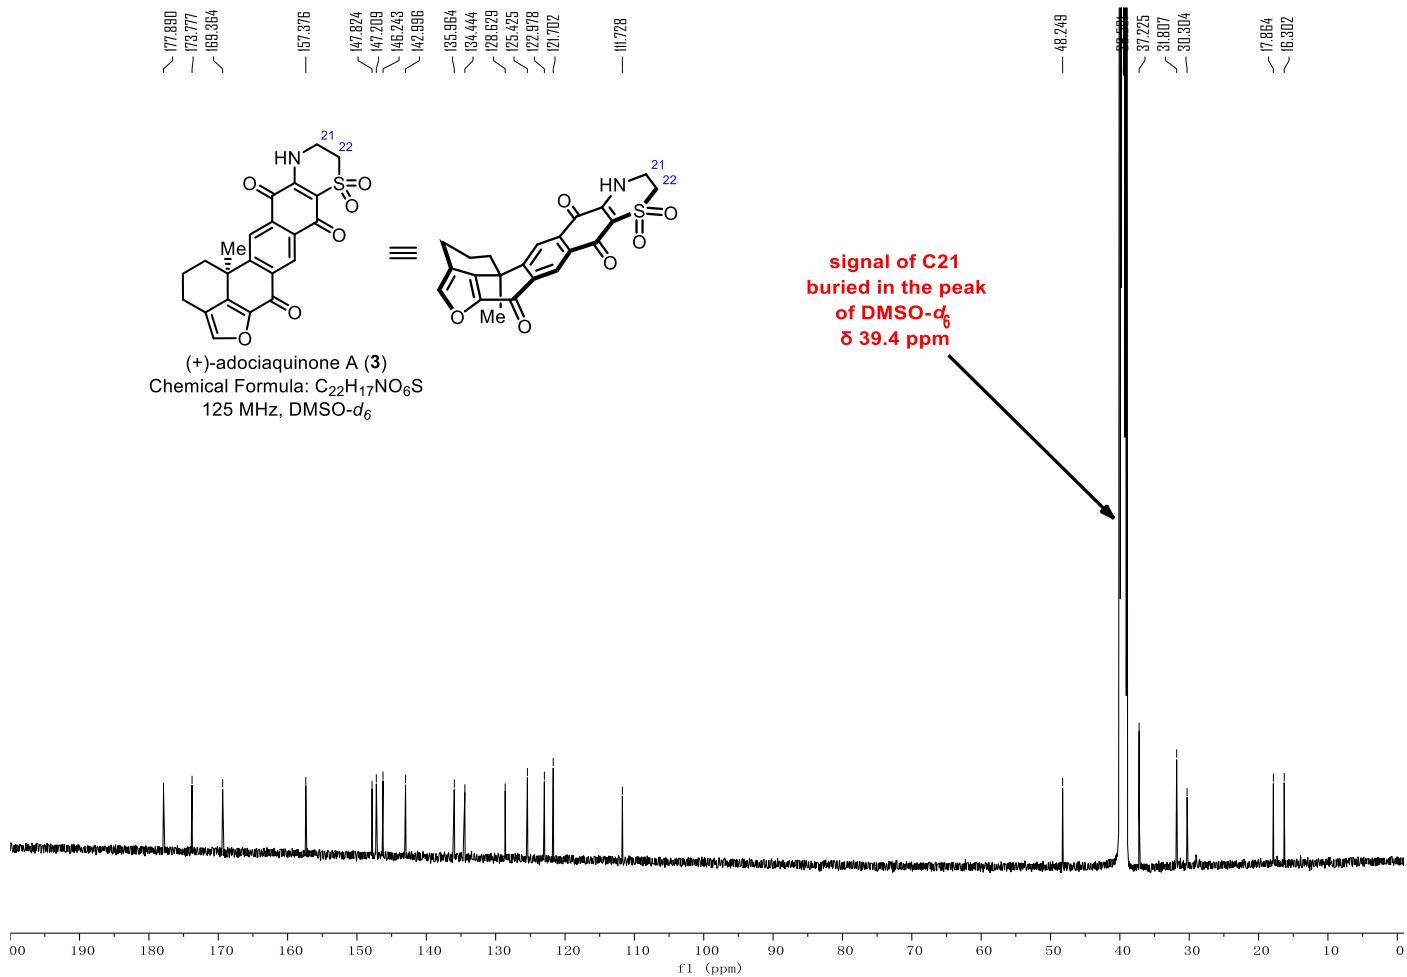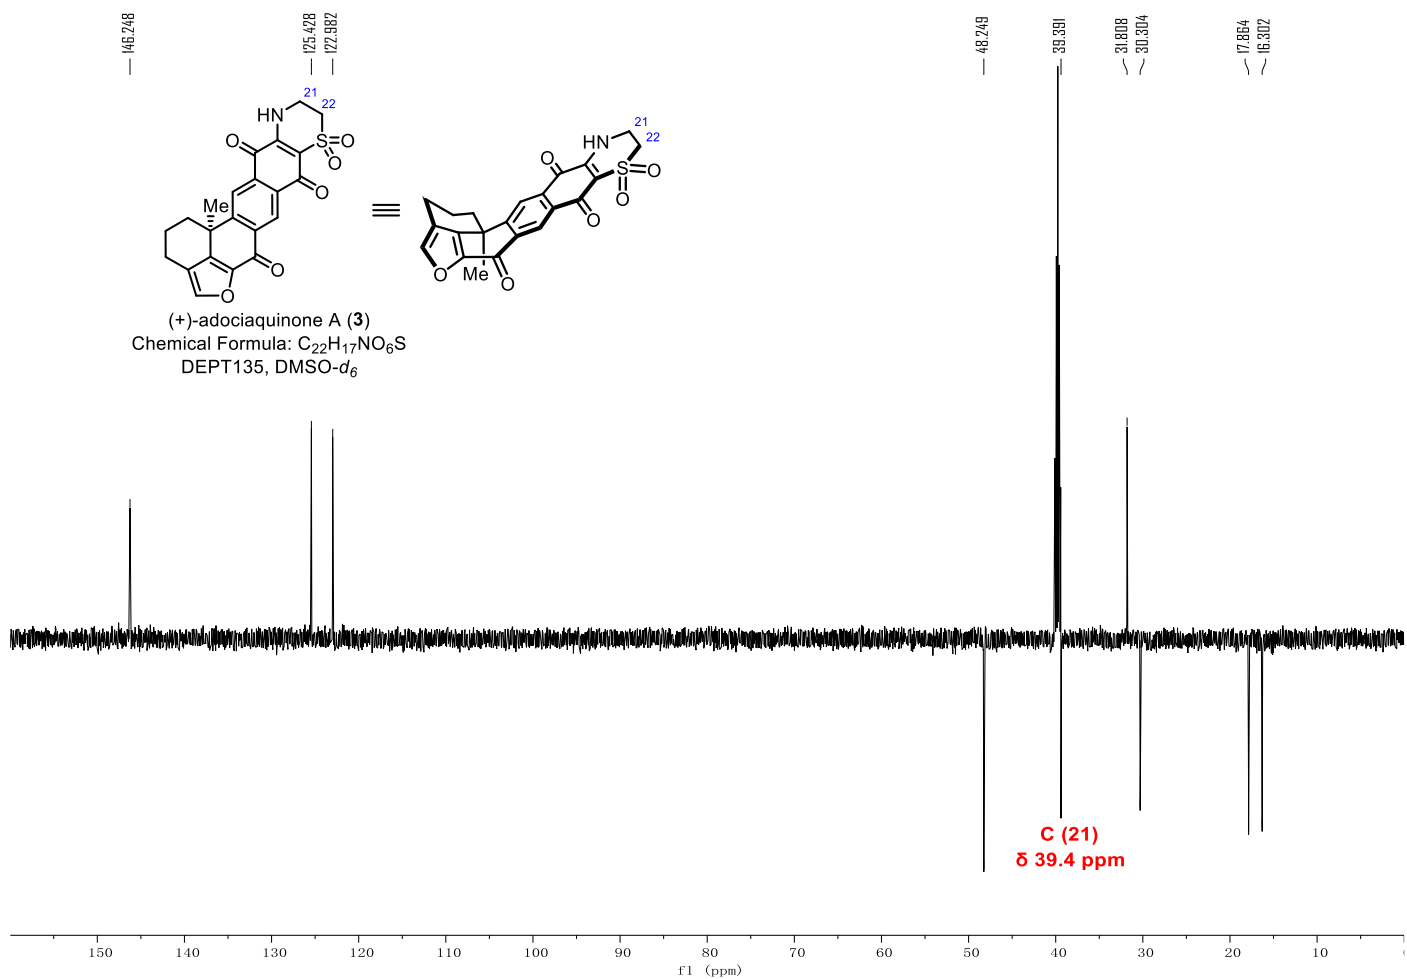

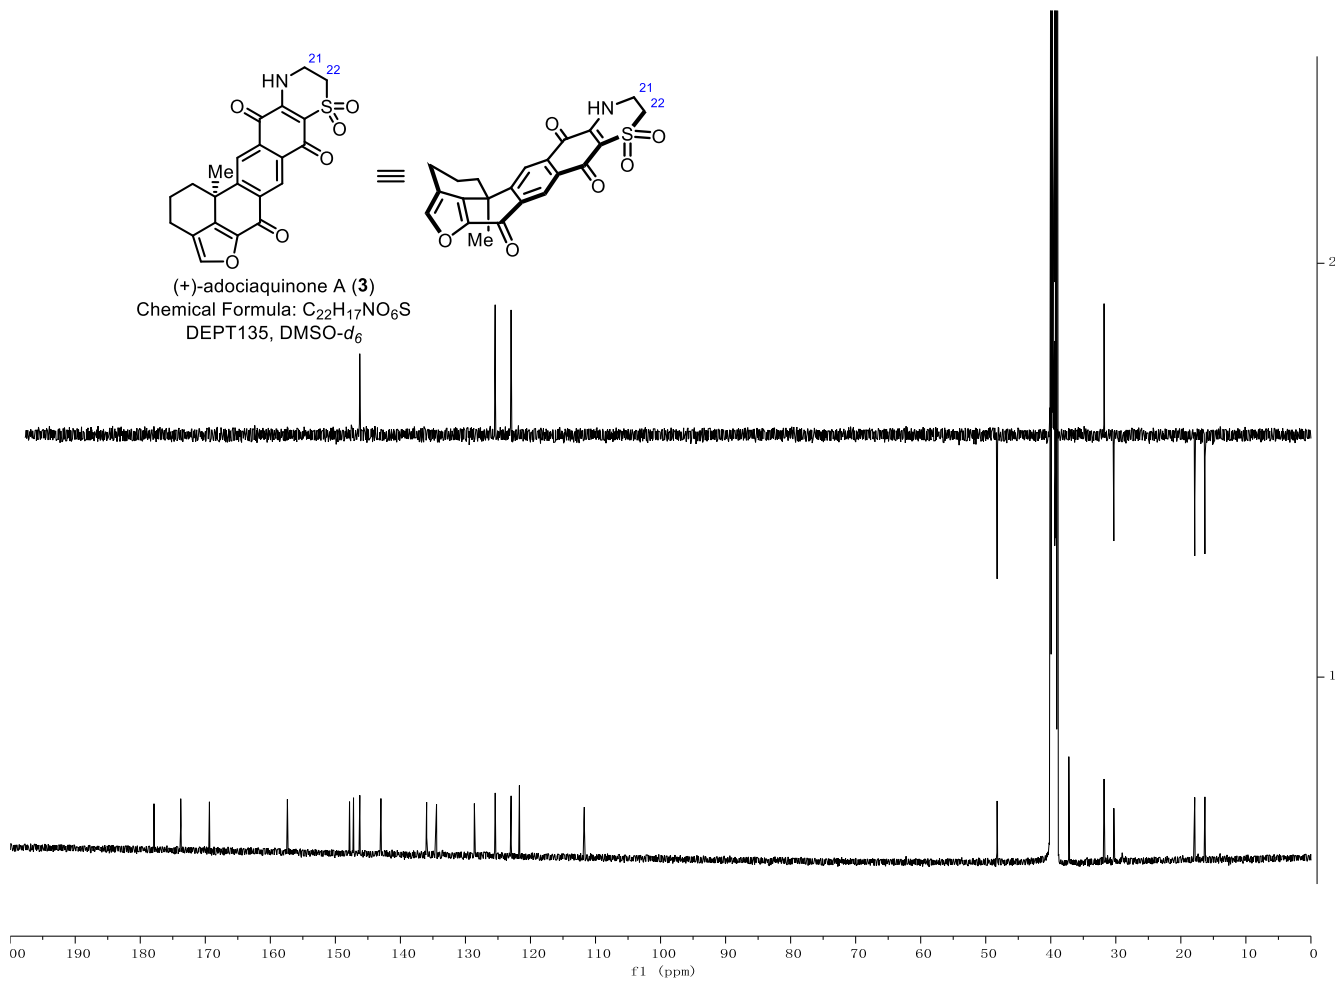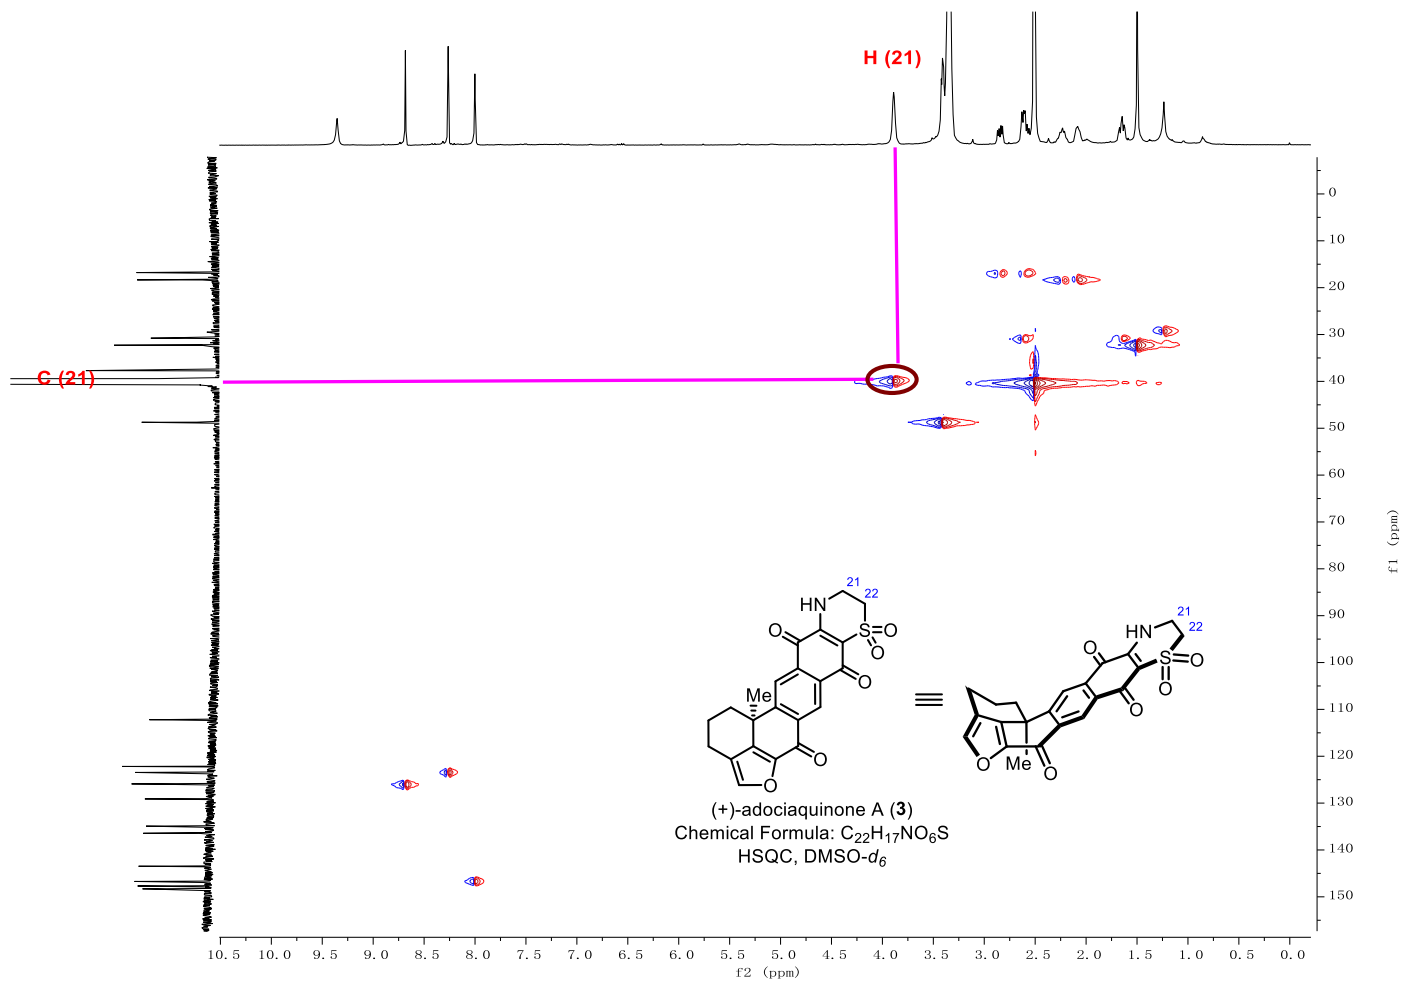

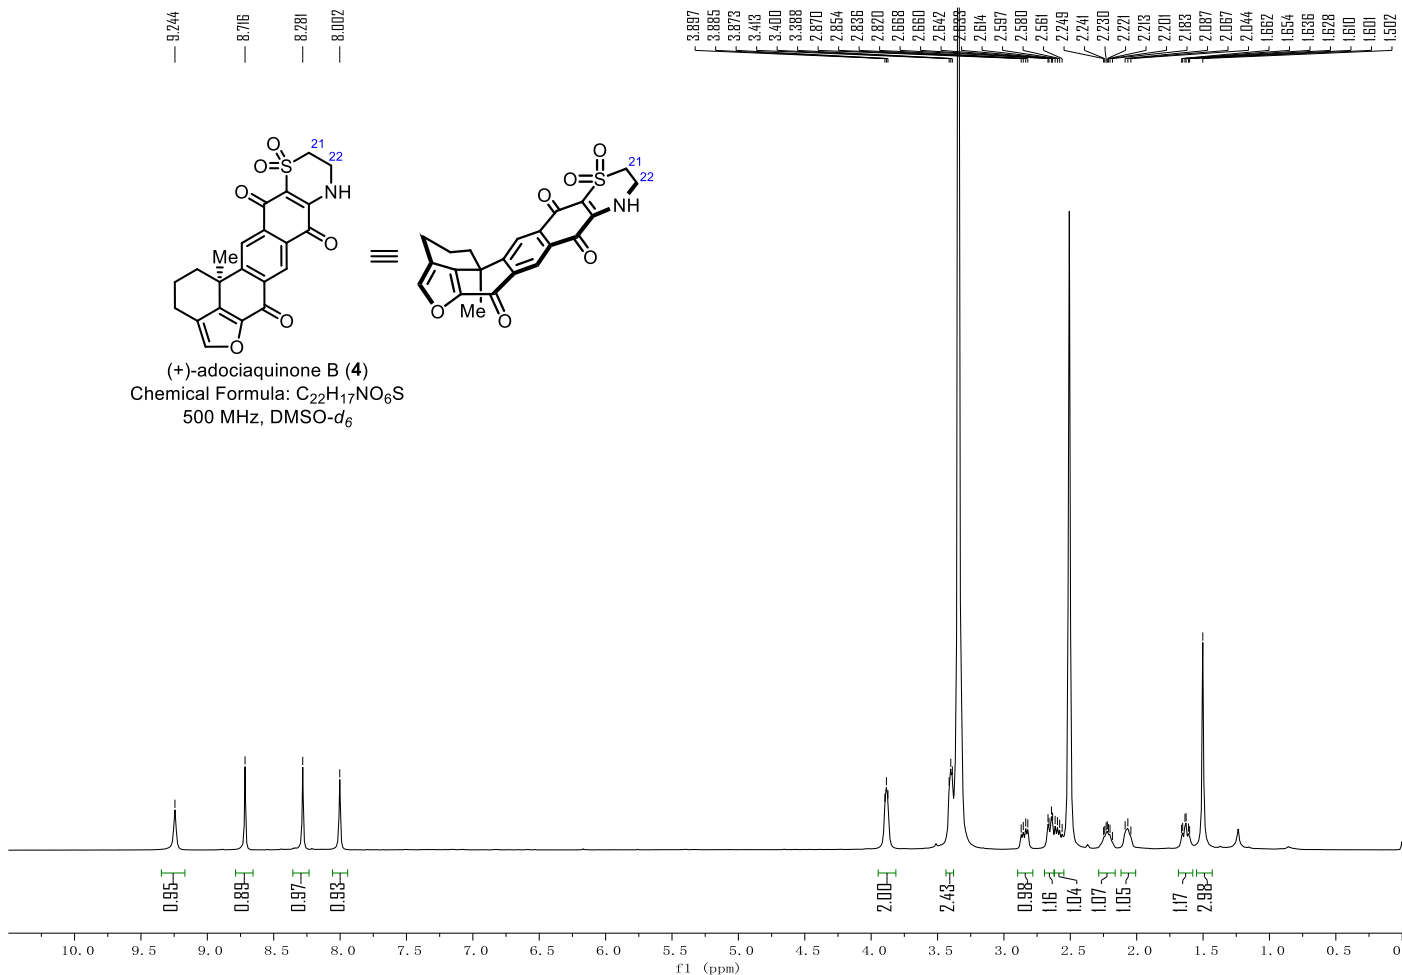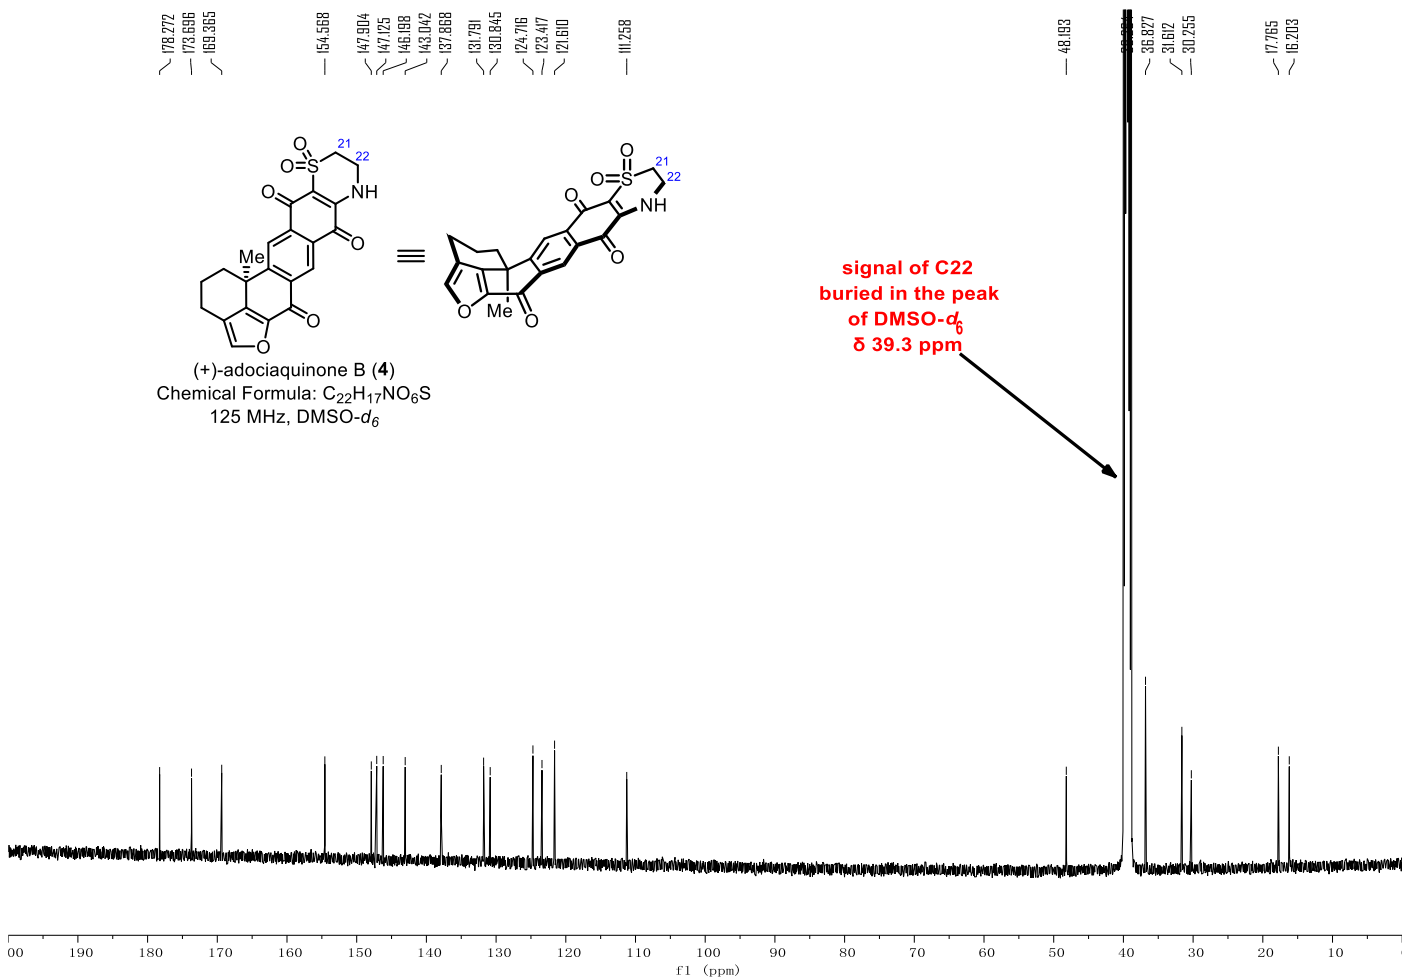

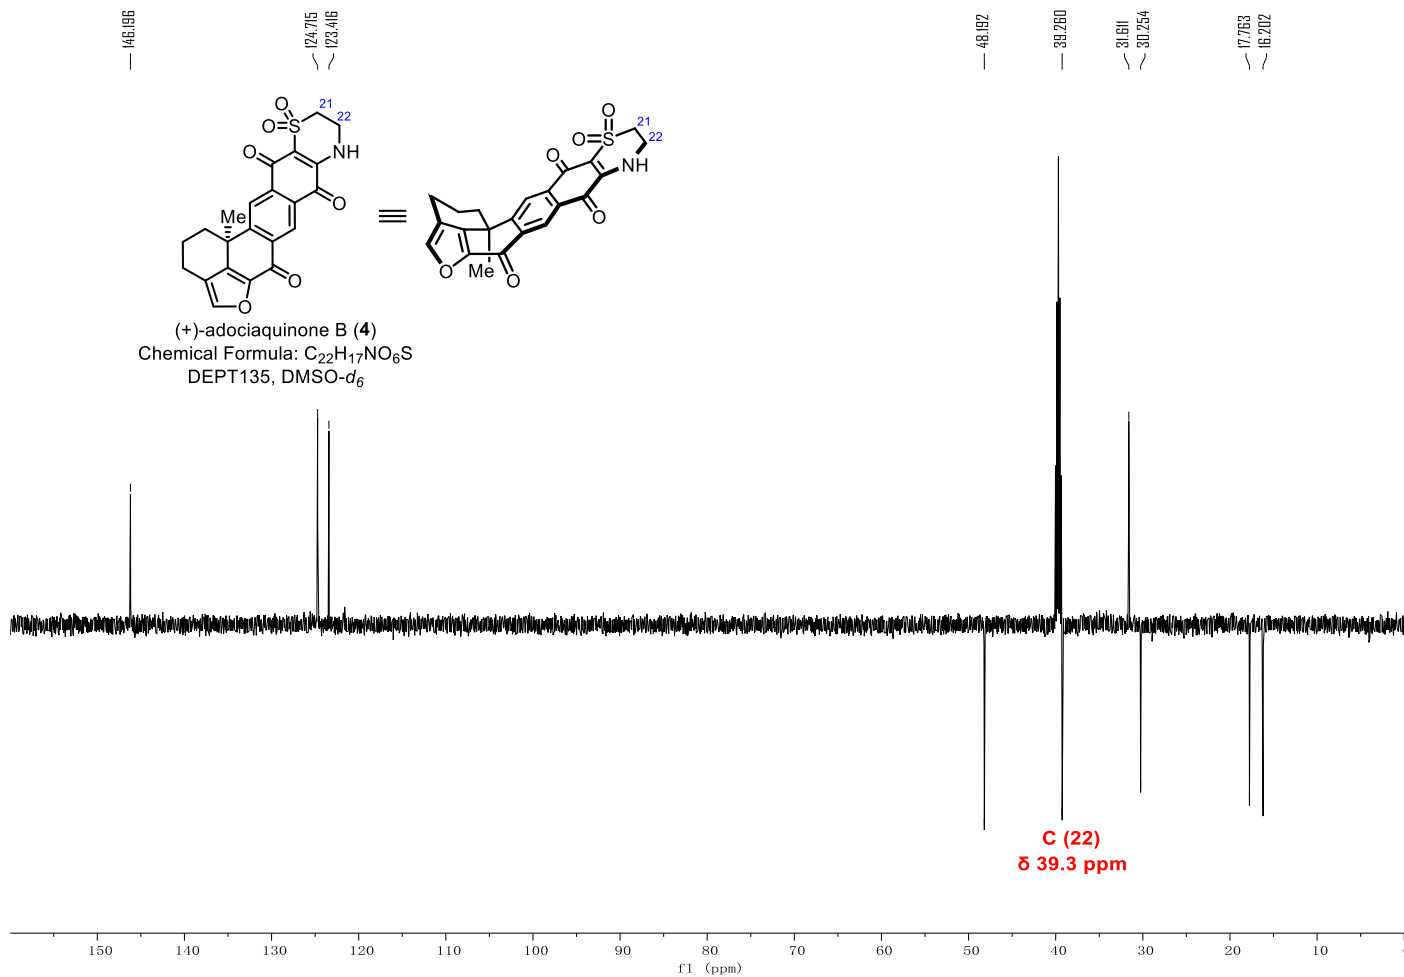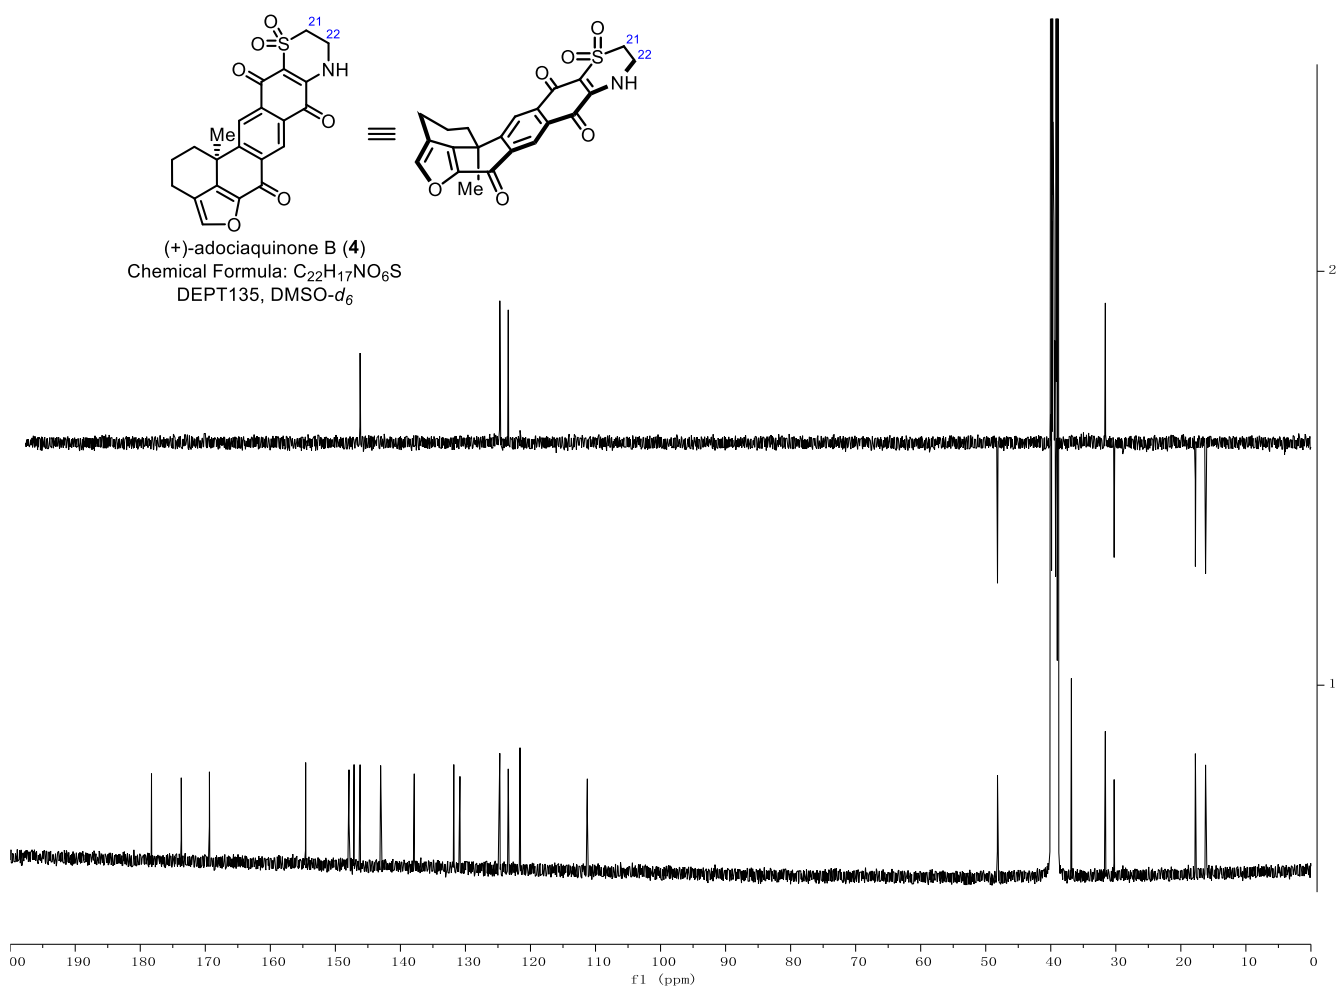

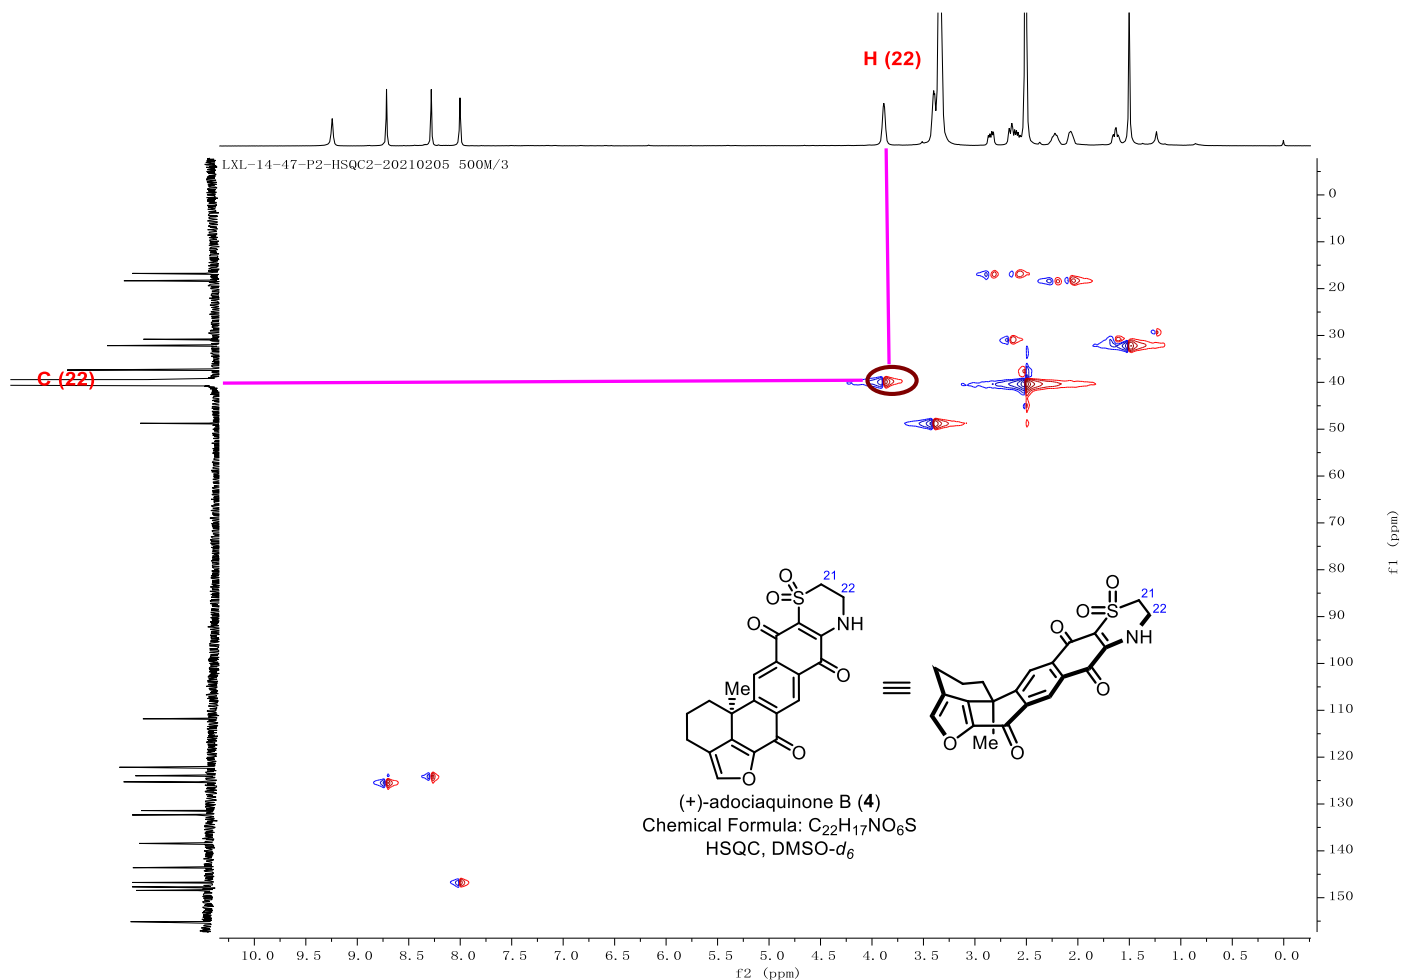

## HPLC spectra of product 14.

1. Table S1, entry 1, racemate of product 14a/14a': HPLC analysis, Chiralpak IG-H, *i*-PrOH/hexane = 20/80, 0.8 mL/min, 234 nm;  $t_{r1}$  = 23.774 min,  $t_{r2}$  = 27.376 min.

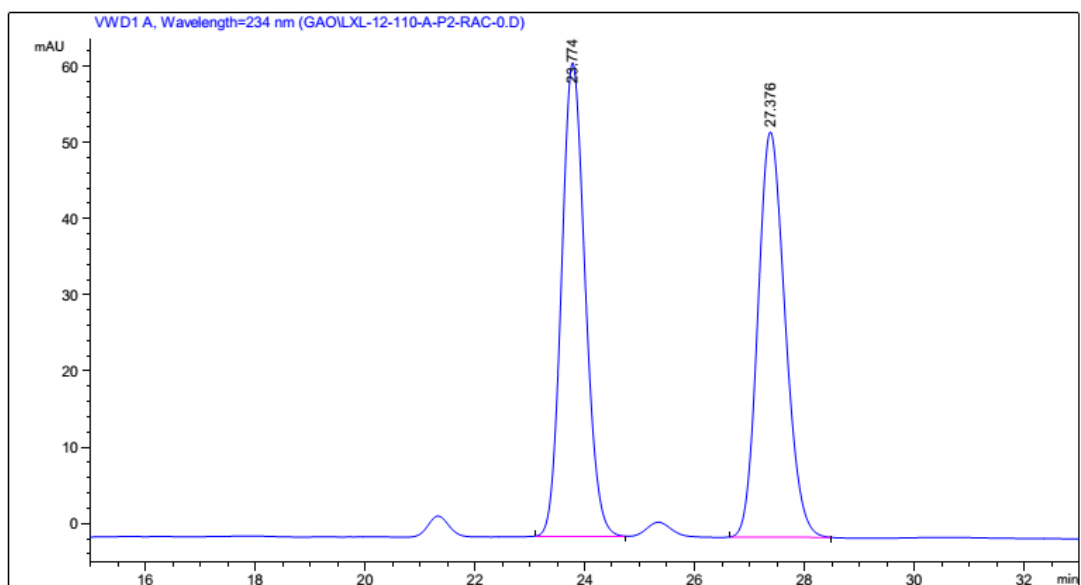

Signal 1: VWD1 A, Wavelength=234 nm

| Peak # | RetTime [min] | Type | Width [min] | Area mAU *s | Height [mAU] | Area %  |
|--------|---------------|------|-------------|-------------|--------------|---------|
| 1      | 23.774        | BB   | 0.4633      | 1856.48975  | 62.19220     | 50.2387 |
| 2      | 27.376        | BB   | 0.5358      | 1838.84778  | 53.19823     | 49.7613 |

Totals : 3695.33752 115.39043





4. **Table S1**, entry 1, racemate of product **14b/14b'**: HPLC analysis, Chiralpak IG-H, *i*-PrOH/hexane = 15/85, 0.8 mL/min, 234 nm;  $t_{r1}$  = 26.635 min,  $t_{r2}$  = 32.160 min.

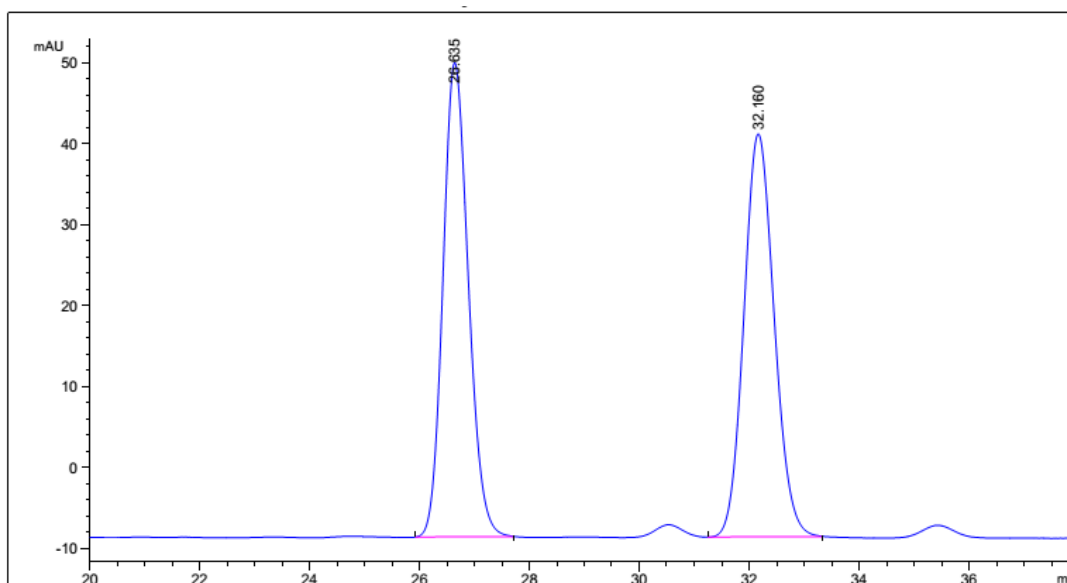

Signal 1: VWD1 A, Wavelength=234 nm

| Peak # | RetTime [min] | Type | Width [min] | Area mAU   | Area *s | Height [mAU] | Area %  |
|--------|---------------|------|-------------|------------|---------|--------------|---------|
| 1      | 26.635        | BB   | 0.4890      | 1879.38318 |         | 58.63712     | 49.6089 |
| 2      | 32.160        | VB   | 0.5913      | 1909.01538 |         | 49.80637     | 50.3911 |

Totals : 3788.39856 108.44349

5. **Table 1**, entry 12, 1.31g scale, 97% e.e. for product **14a**: HPLC analysis, Chiralpak IG-H, *i*-PrOH/hexane = 15/85, 0.8 mL/min, 234 nm;  $t_{r1}$  (minor) = 30.103 min,  $t_{r2}$  (major) = 34.725 min.

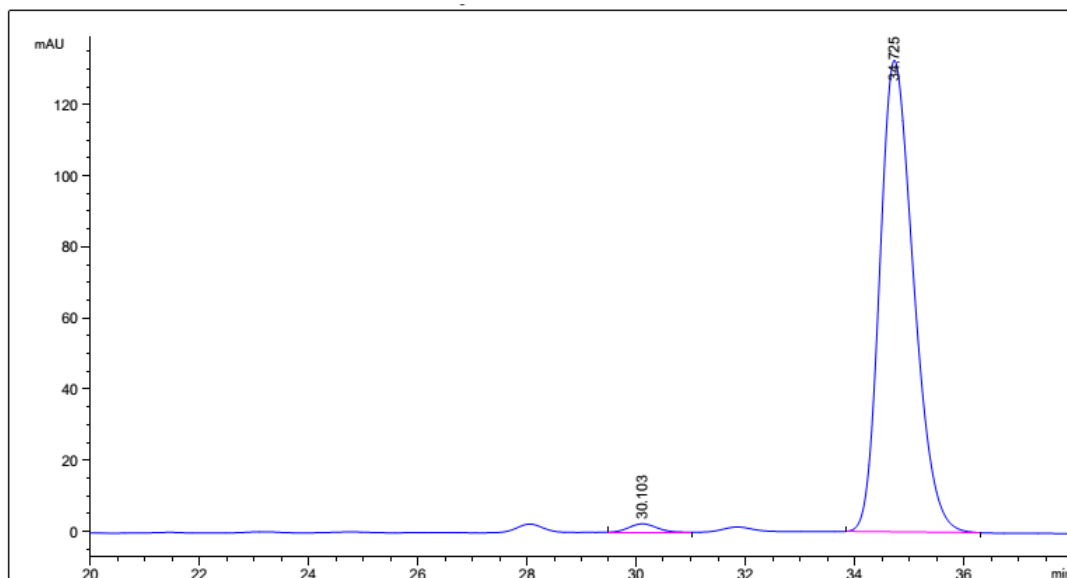

Signal 1: VWD1 A, Wavelength=234 nm

| Peak # | RetTime [min] | Type | Width [min] | Area mAU   | Area *s | Height [mAU] | Area %  |
|--------|---------------|------|-------------|------------|---------|--------------|---------|
| 1      | 30.103        | BB   | 0.4274      | 83.47428   |         | 2.36739      | 1.4422  |
| 2      | 34.725        | BB   | 0.6506      | 5704.58008 |         | 132.56462    | 98.5578 |

Totals : 5788.05436 134.93202

6. **Table 1**, entry 12, 1.31g scale, 91% e.e. for product **14b**: HPLC analysis, Chiralpak IG-H, *i*-PrOH/hexane = 15/85, 0.8 mL/min, 234 nm;  $t_{r1}$  (minor) = 26.406 min,  $t_{r2}$  (major) = 31.770 min.

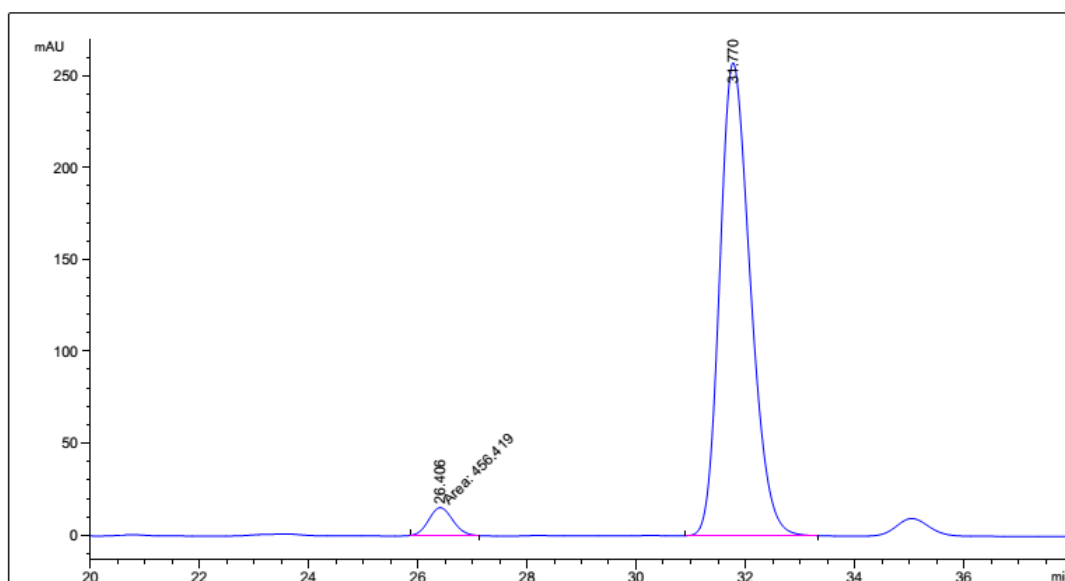

Signal 1: VWD1 A, Wavelength=234 nm

| Peak # | RetTime [min] | Type | Width [min] | Area mAU *s | Height [mAU] | Area %  |
|--------|---------------|------|-------------|-------------|--------------|---------|
| 1      | 26.406        | MM   | 0.5051      | 456.41907   | 15.06138     | 4.3573  |
| 2      | 31.770        | BB   | 0.5988      | 1.00185e4   | 257.10541    | 95.6427 |

Totals : 1.04749e4 272.16679

7. **Table S1**, entry 11, -97% e.e. for product **14a'**: HPLC analysis, Chiralpak IG-H, *i*-PrOH/hexane = 20/80, 0.8 mL/min, 234 nm;  $t_{r1}$  (major) = 24.030 min,  $t_{r2}$  (minor) = 27.856 min.

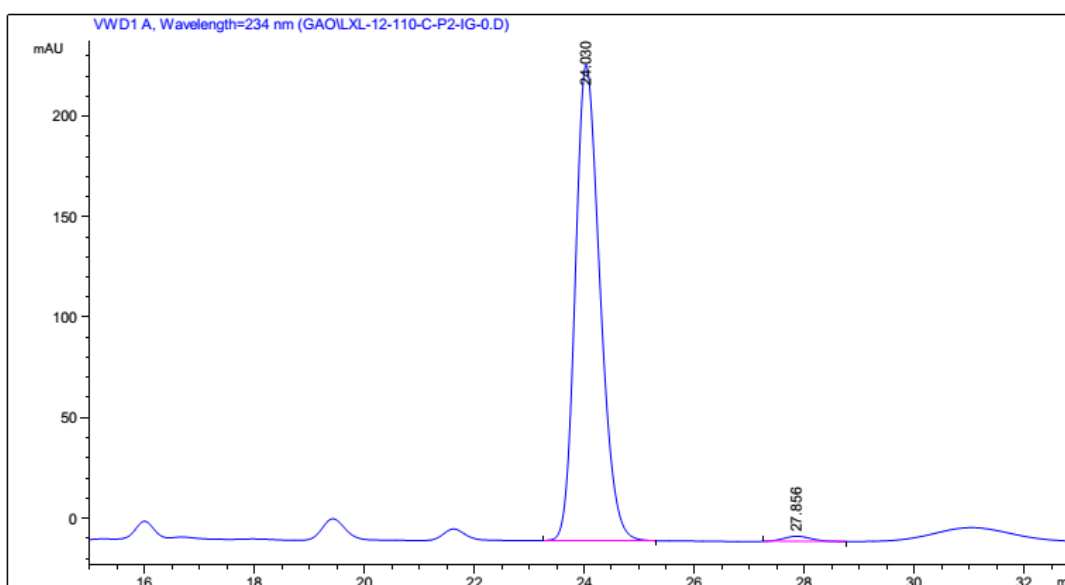

Signal 1: VWD1 A, Wavelength=234 nm

| Peak # | RetTime [min] | Type | Width [min] | Area mAU *s | Height [mAU] | Area %  |
|--------|---------------|------|-------------|-------------|--------------|---------|
| 1      | 24.030        | BB   | 0.4795      | 7378.74805  | 236.65709    | 98.7760 |
| 2      | 27.856        | BB   | 0.4136      | 91.43444    | 2.60232      | 1.2240  |

Totals : 7470.18249 239.25941

8. **Table S1**, entry 11, -89% e.e. for product **14b'**: HPLC analysis, Chiralpak IG-H, *i*-PrOH/hexane = 20/80, 0.8 mL/min, 234 nm;  $t_{r1}$  (major) = 21.637 min,  $t_{r2}$  (minor) = 25.830 min.

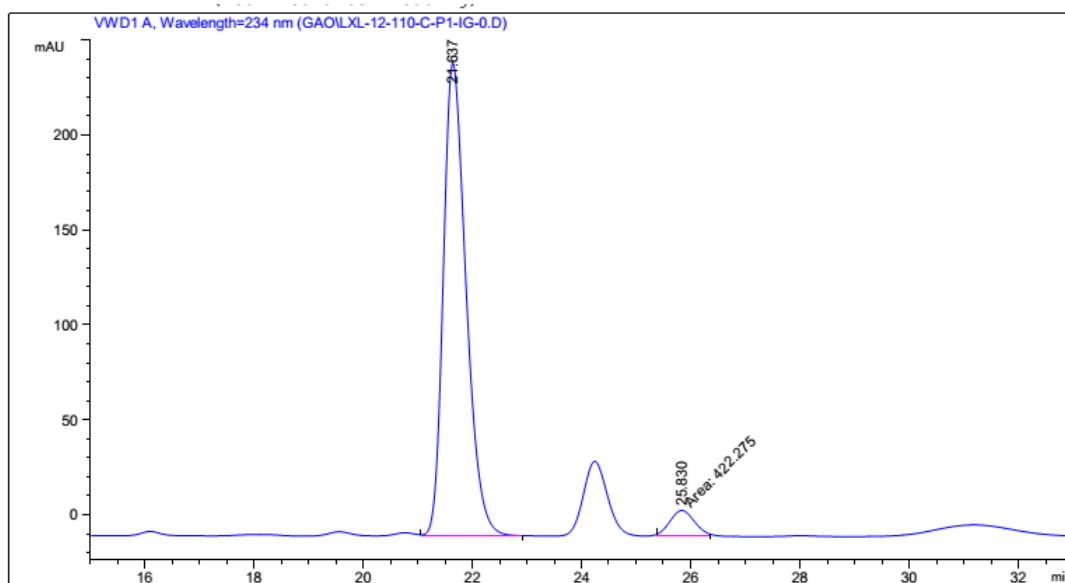

Signal 1: VWD1 A, Wavelength=234 nm

| Peak # | RetTime [min] | Type | Width [min] | Area mAU *s | Height [mAU] | Area %  |
|--------|---------------|------|-------------|-------------|--------------|---------|
| 1      | 21.637        | VB   | 0.4438      | 7187.94141  | 248.97035    | 94.4512 |
| 2      | 25.830        | MM   | 0.5234      | 422.27490   | 13.44546     | 5.5488  |

Totals : 7610.21631 262.41581
